1                   **Prominent members of the human gut microbiota express endo-acting O-**  
2                   **glycanases to initiate mucin breakdown**

3  
4       Lucy I. Crouch<sup>1\*</sup>, Marcelo V. Liberato<sup>2</sup>, Paulina A. Urbanowicz<sup>3</sup>, Arnaud Baslé<sup>1</sup>, Christopher  
5       A. Lamb<sup>6</sup>, Christopher J. Stewart<sup>4</sup>, Katie Cooke<sup>4</sup>, Mary Doona<sup>6</sup>, Stephanie Needham<sup>7</sup>,  
6       Richard R. Brady<sup>5</sup>, Janet E. Berrington<sup>8</sup>, Katarina Madunic<sup>9</sup>, Manfred Wuhrer<sup>9</sup>, Peter  
7       Chater<sup>1</sup>, Jeffery P. Pearson<sup>1</sup>, Robert Glowacki<sup>10</sup>, Eric C. Martens<sup>10</sup>, Fuming Zhang<sup>11</sup>, Robert  
8       J. Linhardt<sup>11</sup>, Daniel I. R. Spencer<sup>3</sup> and David N. Bolam<sup>1\*</sup>

9  
10   <sup>1</sup> Institute of Cell and Molecular Biosciences, Newcastle University, Newcastle upon Tyne,  
11   UK.

12   <sup>2</sup> Universidade de Sorocaba, Programa de Processos Tecnológicos e Ambientais,  
13   Sorocaba, SP, Brasil.

14   <sup>3</sup> Ludger Ltd, Culham Science Centre, Abingdon, UK.

15   <sup>4</sup> Institute of Cellular Medicine, Newcastle University, Newcastle upon Tyne, UK.

16   <sup>5</sup> Department of Colorectal Surgery, Newcastle upon Tyne Hospitals NHS Foundation Trust,  
17   Newcastle upon Tyne, UK.

18   <sup>6</sup> Department of Gastroenterology, Newcastle upon Tyne Hospitals NHS Foundation Trust,  
19   Newcastle upon Tyne, UK.

20   <sup>7</sup> Department of Histopathology, Newcastle upon Tyne Hospitals NHS Foundation Trust,  
21   Newcastle upon Tyne, UK.

22   <sup>8</sup> Newcastle Neonatal Service, Royal Victoria Infirmary, Newcastle upon Tyne, UK.

23   <sup>9</sup> Centre for Proteomics and Metabolomics, Leiden University Medical Centre, Leiden,  
24   Netherlands.

25   <sup>10</sup> Department of Microbiology and Immunology, University of Michigan Medical School, Ann  
26   Arbor, MI, USA.

27   <sup>11</sup> Department of Chemistry and Chemical Biology, Centre for Biotechnology and  
28   Interdisciplinary Studies, Rensselaer Polytechnic Institute, Troy, NY 12180, USA.

29  
30   \*To whom correspondence should, be addressed: [david.bolam@ncl.ac.uk](mailto:david.bolam@ncl.ac.uk) or  
31   [lucy.crouch@ncl.ac.uk](mailto:lucy.crouch@ncl.ac.uk).

32

33 **Abstract**

34 The human gut microbiota (HGM) are closely associated with health, development and  
35 disease. The thick intestinal mucus layer, especially in the colon, is the key barrier between  
36 the contents of the lumen and the epithelial cells, providing protection against infiltration by  
37 the microbiota as well potential pathogens. The upper layer of the colonic mucus is a niche for  
38 a subset of the microbiota which utilise the mucin glycoproteins as a nutrient source and mucin  
39 grazing by the microbiota appears to play a key role in maintaining barrier function as well as  
40 community stability. Despite the importance of mucin breakdown for gut health, the  
41 mechanisms by which gut bacteria access this complex glycoprotein are not well understood.  
42 The current model for mucin degradation involves exclusively exo-acting glycosidases that  
43 sequentially trim monosaccharides from the termini of the glycan chains to eventually allow  
44 access to the mucin peptide backbone by proteases. However, this model is in direct contrast  
45 to the Sus paradigm of glycan breakdown used by the Bacteroidetes which involves  
46 extracellular cleavage of glycans by surface located endo-acting enzymes prior to import of  
47 the oligosaccharide products. Here we describe the discovery and characterisation of endo-  
48 acting family 16 glycoside hydrolases (GH16s) from prominent mucin degrading gut bacteria  
49 that specifically target the oligosaccharide side chains of intestinal mucins from both animals  
50 and humans. These endo-acting O-glycanases display  $\beta$ 1,4-galactosidase activity and in  
51 several cases are surface located indicating they are involved in the initial step in mucin  
52 breakdown. The data suggest a new paradigm for mucin breakdown by the microbiota and  
53 the endo-mucinases provide a potential tool to explore changes that occur in mucin structure  
54 in intestinal disorders such as inflammatory bowel disease and colon cancer.

## 55 Introduction

56 The human gastrointestinal (GI) tract is home to a large and complex community of microbes  
57 known as the gut microbiota, which in the large intestine there is an estimated between 100-  
58 1000 trillion bacteria<sup>1</sup>. The mucous layer of the GI tract protects the underlying epithelia from  
59 the huge microbial load of mutualists, environmental insults and enteric pathogens.

60 The GI mucus layer is predominantly composed of gel-forming mucins, which are complex  
61 glycoproteins secreted by the epithelial cells<sup>2</sup>. Different mucins are expressed in different  
62 mucosal surfaces throughout the body and a complete mucin glycoprotein is at least 50 % O-  
63 glycan by mass<sup>3</sup>. In the colon, MUC2 is the most abundant gel-forming mucin and is composed  
64 of ~80 % glycan<sup>1</sup>. While the number of different monosaccharides making up mucin are  
65 relatively limited, the order in which they can be assembled is hugely variable. This huge  
66 heterogeneity between individual O-glycan chains and very complex macromolecules. It is this  
67 glycan complexity that provides mucin's resistance to microbial degradation and contributes  
68 to the mucus layers' protective role<sup>4</sup>. Notably, however, some prominent bacterial members  
69 of the microbiota, including certain Bacteroidetes spp. and *Akkermanisa muciniphila*<sup>5</sup>, have  
70 developed the capacity to graze on mucins<sup>6-9</sup>. This trait is thought to be critical to initial  
71 colonisation by the microbiota in a new-born and therefore to the development of a healthy  
72 adult microbiota<sup>10</sup>. Mucin grazing also enables survival during the absence of diet-derived  
73 glycans<sup>11</sup> and non-mucin degrading species have been shown to be cross-fed by mucin  
74 degraders, contributing to the long-term survival and stability of the microbiota<sup>12,13</sup>. By contrast,  
75 aberrant or excess degradation of the mucosal layer by the normal microbiota has recently  
76 been linked to enhanced pathogen susceptibility, inflammatory bowel disease and even  
77 colorectal cancer<sup>14,11</sup>. Despite the importance to gut health of mucin breakdown by the  
78 microbiota, little is known about the molecular details of this process. Current models of mucin  
79 degradation propose extracellular sequential trimming of terminal sugars from the O-glycan  
80 side chains by exo-acting glycosidases to eventually expose the peptide backbone for  
81 proteolysis<sup>15</sup>. However, this extracellular 'exo-trimming' model is based only on the activity of  
82 currently characterised mucin active enzymes and notably is in direct contrast with the Gram-  
83 negative Bacteroidetes Sus-like paradigm for glycan breakdown, which requires a surface  
84 endo-acting glycanase to cleave the substrate (polysaccharide or glycoconjugate) into smaller  
85 oligosaccharides for uptake by the SusC/D OM complex<sup>16-18</sup>. Here we describe the discovery  
86 and biochemical and structural characterisation of enzymes expressed by mucin degrading  
87 members of the gut microbiota that are able to specifically cleave the O-glycan chains of a  
88 range of different animal and human mucins in an endo-like manner. Many of these endo-O-  
89 glycanases are surface located and thus support a model where the initial step of mucin  
90 degradation by gut bacteria is the extracellular removal of oligosaccharide chains from the  
91 glycoprotein, prior to import of these oligosaccharides for intracellular processing. This model

92 fits the Sus paradigm and significantly enhances our understating of the mechanism of mucin  
93 breakdown by the microbiota. Furthermore, the activity displayed by these enzymes suggest  
94 they could be exploited as tools to explore changes that occur in mucin glycosylation in  
95 intestinal disorders such as IBD and colon cancer.

## 96 **Results**

### 97 ***Identification of GH16 enzymes expressed during growth on mucin***

98 Inspection of previously published transcriptomic and proteomic data from four Gram-  
99 negative prominent mucin degrading HGM species (*B. thetaiotaomicron*, *B. fragilis*, *B.*  
100 *caccae* and *A. mucinphila*) identified genes and proteins which are likely involved in mucin  
101 breakdown<sup>8,11,19-22</sup>. These included many exo-acting enzymes from CAZy families  
102 (carbohydrate active enzymes; CAZymes) previously identified as involved degradation of O-  
103 glycans, and in the case of *Bacteroides* spp., SusCD glycan import apparatus and putative  
104 surface glycan binding proteins (pSGBPs; Supplementary Fig. 1-3). Surprisingly, some of  
105 the most upregulated CAZymes in all species analysed were from glycoside hydrolase family  
106 16 (GH16). This is unexpected as GH16 enzymes are to date almost exclusively endo-acting  
107 and have been predominantly characterised as targeting a variety of marine or terrestrial  
108 plant polysaccharides, specifically  $\beta$ 1,3 or 1,4 glycosidic bonds of glucans and galactans  
109 (Supplementary Fig 4). More specifically, these enzymes are a part of subfamily 3 of this  
110 family, which is a large and sequence-diverse subfamily characterised solely as  $\beta$ 1,3/4-  
111 glucosidases found in Metazoa, Fungi, Archaea and Bacteria<sup>23</sup>. In total nine GH16 enzymes  
112 were identified from the four species analysed (Supplementary Fig. 1-3 and Supplementary  
113 Table 1). Sequence comparison of these enzymes with GH16 family members from other  
114 *Bacteroides* spp. indicates that there may be similar enzymes present in species other than  
115 the ones characterised in this report (Supplementary Fig. 5). Furthermore, five of them are  
116 predicted lipoproteins and therefore likely cell surface associated (Supplementary Table 2).  
117 For details on the genomic context of these genes and phylogenetic analysis see  
118 Supplementary Discussion and Supplementary Figs. 5-7.

119

### 120 ***The GH16 enzymes are endo-acting mucinases***

121 To explore the activity of the O-glycan-upregulated GH16 enzymes, the recombinant forms  
122 of the enzymes were screened against mucin from porcine small intestinal (SI) mucin and  
123 porcine stomach mucins (PGM type II and III; Supplementary Fig. 8). Initial analysis by TLC  
124 suggested that all nine enzymes were active against both SI and gastric mucins and  
125 released a range of products that are larger than monosaccharides from these glycoproteins,  
126 suggesting endo-like cleavage of the O-glycan chains. To investigate the identity of these  
127 products in more detail, the products were labelled with the fluorophore procainamide and  
128 analysed by liquid chromatography-fluorescence-detection-electrospray-mass spectrometry  
129 (LC-FLD-ESI-MS) and the glycan structures determined by MS/MS (Fig. 2a). The data show  
130 that oligosaccharides are produced by the GH16 enzymes with between 2 and 6 alternating  
131 hexose and HexNAc sugars that are likely to be sections of the polyLacNAc repeats that  
132 form the repeating unit of O-glycan chains (Fig. 1b). The reducing ends were all hexoses,

133 indicating hydrolysis occurred at  $\beta$ -galactose ( $\alpha$ -galactose only occurs in mucins as a  
134 terminal sugar in blood group B structures) and the products also had a range of fucose and  
135 sulfate decoration, revealing these can be accommodated by the GH16 enzymes. Overall  
136 these data suggest the nine GH16 enzymes are all endo-acting  $\beta$ -galactosidases that are  
137 active on the O-glycan side chains of mucin. Notably, sialic acid (SA) was never observed as  
138 a decoration on any products released by the enzymes, even though SA is present on mucin  
139 glycans. These data suggest this terminal sugar decoration cannot be accommodated by the  
140 GH16 enzymes and, as a result, the broad acting sialidase BT0455<sup>GH33</sup> was included in all  
141 assays to maximise access of the GH16 enzymes to the mucin chains.

142 The O-glycan products from the nine GH16 family members from SI mucin varied somewhat,  
143 but could be split into two main groups (Fig. 2a). The first group comprised six of the  
144 enzymes (BT2824<sup>GH16</sup>, BF4058<sup>GH16</sup>, BF4060<sup>GH16</sup>, Baccac\_02680<sup>GH16</sup>, Baccac\_03717<sup>GH16</sup>,  
145 and Amuc\_2108<sup>GH16</sup>) whose products were mainly made up of glycans no more than four  
146 sugars in length, although very small amounts of longer oligosaccharides could be detected.  
147 The second group composed of Baccac\_02679<sup>GH16</sup>, Amuc\_0724<sup>GH16</sup> and Amuc\_0875<sup>GH16</sup>  
148 produced a mix of short and longer chain glycans (up to 6 sugars long). Amuc\_0875<sup>GH16</sup>  
149 consistently had lowest relative activity against all mucins.

150 To investigate the structures of the oligosaccharide released by the GH16 enzymes in more  
151 detail, the products of BF4058<sup>GH16</sup> degradation of SI mucin were treated with a series of exo-  
152 acting glycosidases of known specificity (Fig. 2b and Supplementary Figs. 9 and 10). With  
153 the inclusion of a broad acting  $\alpha$ -1,2 fucosidase<sup>24</sup>, there is a different proportion of  
154 oligosaccharides, notably, *glycans* 7 and 10 disappear and an increase in a relative  
155 abundance of *glycans* 5 and 6 complements this. A bigger array of larger oligosaccharides  
156 are now also observed suggesting that the fucosidase is allowing the GH16 enzyme access  
157 to more complex structures. *Glycan* 6 shifts in position and these two different resolving  
158 times indicate different isomers - for instance this could simply mean a different linkage  
159 between two sugars or could be a completely different re-ordering of the monosaccharides  
160 within a glycan. The fucosylations that are still present on the glycans produced in the  
161 presence of fucosidase are likely to either be inaccessible to this particular enzyme or have  
162 either  $\alpha$ -1,3 or 4 linkages which are also present in mucins.

163 Inclusion of further exo-glycosidases with the BF4058<sup>GH16</sup>, sialidase and fucosidase digests  
164 reveal further insight into the oligosaccharide structures released by the GH16. The addition  
165 of a  $\beta$ 1,4-galactosidase (BT0461<sup>GH2</sup>)<sup>25</sup> removes one of the *glycan* 5 peaks, indicating this  
166 saccharide is capped with a  $\beta$ 1,4-galactose, while both *glycan* 5 peaks disappear with the  
167 addition of a  $\beta$ 1,3/4-galactosidase (BF4061<sup>GH35</sup>; see Supplementary discussion and  
168 supplementary Fig. 10), indicating the other *glycan* 5 peak is capped with a  $\beta$ 1,3-galactose.  
169 Interestingly, the  $\beta$ -GlcNAc'ase (BT0459<sup>GH20</sup>)<sup>25</sup> could degrade the sulfated GlcNAc-Gal

170 disaccharide, although the position of the sulfation is not known so it is unclear at which  
171 position the enzyme can accommodate this modification (Fig. 2b, *glycan 3*).

172 Exo-acting enzymes specific to either the  $\alpha$ -GalNAc and  $\alpha$ -galactose found on blood group A  
173 or B structures, respectively, were also included (Supplementary Fig. 9). No difference in  
174 glycans was observed when an  $\alpha$ -galactosidase was added, but inclusion of an  $\alpha$ -  
175 GalNAc'ase revealed several of the larger oligosaccharides could be further degraded,  
176 indicating these glycans have a capping  $\alpha$ -GalNAc (Fig. 2b, *glycans 9, 11, 13 and 16*).

177 Keratan sulfate is structurally similar to mucin O-glycans in having a repeating polyLacNAc  
178 structure with 6S sulfation possible on both the galactose and GlcNAc, but less fucosylation  
179 and sialylation than most mucins. The nine GH16 family members were active against egg  
180 and bovine corneal keratan sulfate (Supplementary Fig. 11) and the released products  
181 indicate that a number of sulfate groups can be tolerated by the enzymes (Supplementary  
182 discussion).

183 A range of defined oligosaccharides were used to further probe the specificity of the O-  
184 glycan active GH16 enzymes. TriLacNAc is hydrolysed by nine GH16 enzymes initially  
185 produce two trisaccharides, one of which is hydrolysed further to produce GlcNAc and  
186 GlcNAc $\beta$ 1,3Gal. The identity of the products was confirmed using specific exo-acting  
187 enzymes (Supplementary Fig. 12). The data revealed that all nine are endo  $\beta$ 1,4-  
188 galactosidases with a requirement for a  $\beta$ 1,3-linked sugar at the -2 position (Supplementary  
189 Fig. 12-15). Furthermore, the GH16 enzymes all displayed a preference for GlcNAc over Glc  
190 at the +1 site, revealing a discrimination for O-glycans over milk oligosaccharides which are  
191 built on a lactose core. Activity on these defined oligosaccharides showed that sulfation and  
192 fucosylation are not required for activity. Blood group sugars in the -3' (fucose) and -4  
193 (GalNAc or Gal) sub-sites are tolerated in most cases but reduce the rate of activity (See  
194 Supplementary discussion and Supplementary Table 4).

195 The activity of the nine recombinant GH16 enzymes was also tested against  
196 polysaccharides previously shown to be GH16 substrates (Supplementary Fig. 16). No  
197 activity could be detected for agarose,  $\kappa$ -carrageenan, porphyran, pectic galactan,  
198 xyloglucan or chitin. However, Amuc\_0724<sup>GH16</sup> displayed significant endo activity against  
199 laminarin and weak activity against barley  $\beta$ -glucan and lichenan. BF4060<sup>GH16</sup>,  
200 Baccac\_02680<sup>GH16</sup> and Baccac\_03717<sup>GH16</sup> also displayed some very weak activity against  
201 laminarin. The possible structural rationale for the activity of Amuc\_0724<sup>GH16</sup> against Glc  
202 configured substrates is discussed in the light of structural information and in the  
203 Supplementary Discussion. Other non-mucin host polysaccharides are also present in  
204 significant amounts in mucosal surfaces, including chondroitin sulfate (CS), heparan sulfate  
205 (HS) and hyaluronic acid (HA). The O-glycan active GH16 enzymes were also tested against



206 these and no significant activity could be found, except for small amounts of product  
207 released from HS and this is explored in the Supplementary Discussion.

208

### 209 **Crystal structures of O-glycan active GH16 family members**

210 to investigate the basis for O-glycan specificity, structures were obtained for four out of the  
211 nine O-glycan active GH16 family members. The apo structures of Baccac\_\_02680<sup>GH16</sup>,  
212 Baccac\_\_02680<sup>GH16E143Q</sup>, BACCAC\_03717<sup>GH16</sup> and Amuc0724<sup>GH16</sup> were obtained to 2.0, 2.1,  
213 2.1 and 2.7 Å, respectively. Structures of BF4060<sup>GH16</sup> and Baccac\_02680<sup>GH16E143Q</sup> were also  
214 obtained with the Gal $\beta$ 1,4GlcNAc $\beta$ 1,3Gal product present in the negative subsites (despite  
215 the latter enzyme being a catalytic mutant) to 3.3 and 2.0 Å (Fig. 3, Supplementary Tables 5  
216 and 6 and Supplementary Figs. 15-17). The electron density of the product allowed us to  
217 model the trisaccharide with confidence, even though the occupancies are less than 100 %.  
218 All of the GH16 enzymes comprise a  $\beta$ -jellyroll fold, characteristic of the family, consisting of  
219 two  $\beta$ -sheets composed of  $\beta$ -strands that form the core fold, which were superimposable  
220 with other GH16 structures previously published. A cleft running along the concave surface  
221 of the enzymes contains the active site and where the trisaccharide product was bound in  
222 the cases of BF4060<sup>GH16</sup> and Baccac\_02680<sup>GH16E143Q</sup> (Fig. 3a). While the location of the  
223 substrate binding site is conserved in the GH16 family, the structures of these clefts vary  
224 depending on substrate specificity (Supplementary Fig. 18a). Some form a tight tunnel for  
225 linear undecorated glycans (e.g. the agarase from *Zobellia galactanivorans*<sup>26</sup>), others are  
226 much more open to accommodate decorations (e.g. the xyloglucanase from *Tropaeolum*  
227 *majus*<sup>27</sup>), while some GH16 enzymes have substrate binding clefts that are curved to  
228 optimise binding to highly curved glycans such as laminarin<sup>28</sup>. There is also a single example  
229 of a GH16 family member that has evolved a pocket-like active site to recognise a specific  
230 disaccharide<sup>29</sup> (Supplementary Fig. 18b). Substrate specificity in the GH16 family appears to  
231 be dictated by the relative size and position of the loops and short  $\alpha$ -helices extending from  
232 the  $\beta$ -strands surrounding the substrate binding cleft. These extensions have been likened to  
233 fingers that interact with substrate, therefore modulating specificity, and that nomenclature is  
234 used herein<sup>30</sup>. For the O-glycanase GH16 enzymes, BF4060<sup>GH16</sup> and Baccac\_02680<sup>GH16E143Q</sup>  
235 have four fingers and BACCAC\_03717<sup>GH16</sup> and Amuc0724<sup>GH16</sup> have five out of six possible  
236 fingers that have been observed previously in other GH16 structures.  
237 Inspection of the Baccac\_02680<sup>GH16E143Q</sup> and BF4060<sup>GH16</sup> structures with product reveal most  
238 of the interactions between enzyme and ligand are with the Gal at -1 and GlcNAc at -2. The -  
239 1 subsite in Baccac\_02680<sup>GH16E143Q</sup> is composed of a number of aromatics, which are also a  
240 common feature of the GH16 structures available (Fig. 3b). This enzyme possesses four  
241 fingers (numbers 1, 3, 5 and 6) that extend towards the cleft, with fingers 1 and 3  
242 sandwiching the negative subsites and fingers 5 and 6 sandwiching the positive subsites.



243 Finger 3 contains the sequence motif for GH16 subfamily 3, which consists of three  
244 tryptophans interspaced by other residues<sup>23</sup>. BF4060<sup>GH16</sup> and Baccac\_02680<sup>GH16</sup> are 79 %  
245 identical and the structures of these two enzymes are almost identical. In contrast,  
246 BACCAC\_03717<sup>GH16</sup> and Amuc0724<sup>GH16</sup> both have a finger 2 (in addition to 1, 3, 5 and 6)  
247 and this has more variable topology of the other fingers (Fig. 3a). For Amuc\_0724<sup>GH16</sup>, finger  
248 2 sits over the top of finger 1, but in the BACCAC\_03717<sup>GH16</sup> structure it points away from  
249 the cleft. This could reflect the flexibility of finger 2 in this enzyme and could potentially come  
250 down over loop 1 in solution like in the Amuc\_0724<sup>GH16</sup> structure or have another role in  
251 BACCAC\_03717<sup>GH16</sup>. The B-factor putty projections of these structures show finger 2 is  
252 dynamic in the BACCAC\_03717<sup>GH16</sup> structure (Supplementary Fig. 17) and alternative  
253 conformations of fingers from the crystal structures of other GH16 family members has been  
254 observed previously, a finding which is indicative of flexibility<sup>31</sup>.

255 GH16 family enzymes target a variety of  $\beta$ -glucan and galactan substrates (Supplementary  
256 Fig. 4). Glucose and galactose differ only in the hydroxyl group at C4 being equatorial or  
257 axial, respectively. For those galactan substrates hydrolysed by the GH16 family, there is  
258 also an anhydrogalactose to accommodate in agarose and carrageenan and sulfation for  
259 porphyran and carrageenan. Porphyran and carrageenan are 6S and 4S sulfated,  
260 respectively, and these decorations would therefore point into the GH16 binding cleft at  
261 subsite -2 and -1, respectively. Structural features characteristic to O-glycans include  
262 alternating Glc and Gal configured sugars and additionally the presence of GlcNAc, which is  
263 not found in other GH16 substrates. In addition, 6S is found on both Gal and GlcNAc and 3S  
264 is possible on the galactose at the non-reducing ends of O-glycan chains

265 There are a number of structural features of the mucin active GH16 family members that  
266 indicate a tailoring towards O-glycans as substrates, which include the polyLacNAc chains  
267 and also fucose and sulfate decoration. Firstly, in the -1 subsites of the structures from  
268 *Bacteroides* spp., the closed space around the O4 hydroxyl explains why only Gal  
269 configured sugars can be recognised as the equatorial O4 of glucose would not be  
270 accommodated (Fig. 3c). The structure of Amuc\_0724<sup>GH16</sup> in this area is much more open  
271 and is a likely explanation for this enzymes additional activity against laminarin  
272 (Supplementary Fig. 18). Furthermore, the open space at the O4 in Amuc\_0724<sup>GH16</sup> is a  
273 potential pocket for sulfation that the *Bacteroides* spp. enzymes would not be able to  
274 accommodate (Supplementary Discussion). Phylogenetic analysis reveals the mucin active  
275 GH16 enzymes are likely to have derived from  $\beta$ -glucanases rather than  $\beta$ -galactanases  
276 (Supplementary Fig. 6), but in the -1 subsite the selection is for galactose rather than  
277 glucose, which shows specificity for O-glycan structures. For the GH16 family there is no  
278 conserved way of selecting between glucose and galactose and specificity for galactans  
279 arises in distinct branches of  $\beta$ -glucanases the phylogenetic tree (Supplementary Fig. 6, for

280 example the endo- $\beta$ 1,3-galactanases), so this is an example of convergent evolution and the  
281 side activity seen in Amuc\_0724<sup>GH16</sup> is linked to its evolutionary origin.

282 Secondly specificity for polyLacNAcs in O-glycans requires a  $\beta$ 1,3 linkage between the -1  
283 and -2 sugars and the structural features driving this specificity in the O-glycan active GH16  
284 enzymes are identical to those in the GH16 enzymes specific for mixed linkage  $\beta$ -  
285 glucanases. An aromatic residue in the -2 subsite (also a part of the sequence motif from the  
286 subfamily) acts as a hydrophobic platform for the GlcNAc at this position and is at 90°  
287 relative to an aromatic residue carrying out the same function in the -1. This feature is  
288 conserved amongst  $\beta$ -glucanases (not in GH16 enzymes with other activities, see  
289 Supplementary Discussion) and is also required also for the degradation of O-glycans.  
290 Thirdly, at the -2 subsite where the GlcNAc is accommodated, the N-acetyl group of the  
291 sugar faces the solvent. Other non-mucinase GH16 enzymes with tighter clefts would not be  
292 able to accommodate this structure. Also in terms of the -2 subsite, overlay of a porphyran  
293 product (originally from a porphyranase GH16 structure<sup>32</sup>) into the clefts of the mucinase  
294 GH16 enzymes indicates that sulfation on the GlcNAc at C3 could be accommodated within  
295 the cleft at the -2 subsite (Supplementary Fig. 19f).

296 Fourthly, substrate depletion assays support a preference for polyLacNAc chains in the  
297 positive subsites (compared to milk oligosaccharides, Supplementary Fig. 13). Although the  
298 product complexes reported here do not have sugars in the positive subsites, comparison  
299 with previously published GH16-substrates complexes could be used to propose a structural  
300 rationale for the preference of GlcNAc at the +1 in the mucin active enzymes (Fig. 3d and  
301 Supplementary Discussion). BF4060<sup>GH16</sup> has a significant preference for triLacNAc over milk  
302 oligosaccharides and analysis of the +1 subsite shows a narrow slot where a GlcNAc would  
303 insert with the N-acetyl pointing away from the cleft and S174 from Finger 5 would pincer the  
304 N-acetyl against finger 6, thus generating specificity for GlcNAc over glucose. The other  
305 structures for O-glycan active GH16 enzymes presented here are more accommodating of  
306 milk oligosaccharides and have more open +1 subsites (Fig. 3d and Supplementary  
307 Discussion).

308

### 309 **The O-glycan active GH16 enzymes target human mucins from health and diseased** 310 **samples**

311 We examined the activity of these GH16 family members on human-derived O-glycans from  
312 three different disease states (Fig. 4). Tissues from two adults suffering from ulcerative  
313 colitis (UC) were obtained and preterm tissue samples from infants with NEC were from 4  
314 infants of gestations 26, 27, 28 and 35 weeks. The three most preterm had terminal ileal  
315 NEC and the 35-week infant had colonic NEC. We also tested a number of cultured  
316 colorectal cancer (CRC) cell lines.

317 Ulcerative colitis (UC) is one form of IDB characterised by an erosion of the mucosal layer<sup>14</sup>.  
318 This allows the bacteria to contact the epithelial layer and induce an inflammatory response.  
319 Necrotising enterocolitis (NEC) is a condition developed by premature infants where a  
320 section of bowel dies, likely linked to an underdeveloped mucosal surface and parts of the  
321 innate immune system being not yet active<sup>33</sup>. A complete understanding of all the factors  
322 driving these diseases has yet to be full determined. Finally, CRC is the second and fourth  
323 deadliest type of cancer in western countries and globally, respectively, and is exacerbated  
324 by a 'Western' lifestyle, so is likely to become an increasing problem<sup>34,35</sup>. Alterations in the  
325 synthesis, secretion and composition of O-glycans in the mucosal surface of the colon have  
326 been linked to causation and exasperation of UC and CRC<sup>1,36-41</sup>.  
327 Human O-glycan samples were incubated with Amuc\_0724<sup>GH16</sup> and sialidase BT0455<sup>GH33</sup>,  
328 labelled with procainamide and analysed using the same methods as described above.  
329 Profiles of GH16 O-glycan products could be produced from all the samples. This work  
330 demonstrates that the O-glycan active GH16 family members provide another avenue for  
331 researchers to analyse O-glycans in different disease states.

## 332 Discussion

333 Mucin turnover by the microbiota appears to play a key role in maintaining the normal barrier  
334 function of the intestinal mucus layer<sup>11</sup>. Despite the importance of this process, our  
335 understanding of the mechanism of mucin breakdown by the microbiota is fragmentary at best.  
336 The current model, which is based mainly on the biochemical characterisation of individual  
337 enzymes, proposes exo-acting glycosidases trim terminal sugars from the oligosaccharides  
338 until the peptide backbone is exposed and can be cleaved by peptidases<sup>15,42</sup>. While this exo-  
339 trimming undoubtedly does occur, based on the large size of the intact mucin molecule, this  
340 would have to be exclusively outside the cell, thus risking loss of valuable resources to  
341 competitors. Furthermore, this extracellular exo-trimming does not fit with the Sus-paradigm  
342 for glycan use by Bacteroidetes, which usually involves endo-cleavage of large substrates on  
343 the cell surface oligosaccharides that are small enough for import across the outer membrane  
344 and further deconstruction in the periplasm<sup>18</sup>. Sus-like systems in Bacteroidetes are encoded  
345 within clusters of co-regulated genes known as PULs, with the products of each PUL all being  
346 involved in breakdown of a specific glycan. Several mucin-using *Bacteroides* spp. are known  
347 to upregulate discrete PULs during growth on mucins, indicating these complex glycoproteins  
348 are degraded using Sus-like systems. Here we provide evidence that prominent mucin-using  
349 members of the gut microbiota express PUL encoded endo-acting glycanases which target  
350 the decorated polyLacNAc structures. Significantly, in all of the *Bacteroides* species studied  
351 here, at least one of the GH16 endo-mucinases was a lipoprotein and therefore most likely  
352 localised to the cell surface (see Supplementary Table 2). These data support a model in  
353 which the endo-mucinases are cleaving oligosaccharide chains from intact mucin at the cell  
354 surface and are therefore likely one of the initial steps in mucin breakdown by these bacteria.  
355 The oligosaccharide products are then imported via the outer membrane SusC/D apparatus  
356 and further degraded in the periplasm by a range of exo-acting enzymes, some of which we  
357 also characterise here (e.g.  $\alpha$ -fucosidases,  $\beta$ -galactosidases,  $\beta$ -hexosaminidases), but also in  
358 some cases by periplasmic GH16 endo-mucinases (e.g. BF4060<sup>GH16</sup>, BACCAC\_02680<sup>GH16</sup>).  
359 The presence of endo-acting enzymes in the periplasm has been described previously for  
360 other glycan breakdown pathways<sup>16</sup> and may increase the efficiency of exo-cleavage by  
361 rapidly generating substrates (i.e. chain ends) for the exo-acting enzymes.  
362 While this model applies to *Bacteroides* spp, it is currently unknown how *Akkermansia* cells  
363 access complex glycans, as while they are also Gram negative, there is no evidence of  
364 SusC/D genes in the Verrucomicrobium phyla<sup>6</sup>. However, there is direct experimental  
365 evidence that at least one of the GH16 mucinases expressed by *A. muciniphila* (Amuc\_2108)  
366 is localised to the outer membrane during growth on mucin, supporting a similar role to the  
367 *Bacteroides* enzymes for the *Akkermansia* GH16 in initiating mucin breakdown. Furthermore,  
368 sequence analysis of most of the exo-acting CAZymes expressed by *A. muciniphila* reveal

369 that these enzymes are likely periplasmic, similar to those observed in *Bacteroides* spp. and  
370 supporting exo-degradation of the surface GH16 released oligosaccharides in the periplasm  
371 of *Akkermasia*.

372 Although targeting of polyLacNAc structures by the GH16 enzymes is likely an initial step in  
373 mucin breakdown, further processing of the remaining mucin would be required. The  
374 polyLacNAc side chains are attached directly to different core glycan structures, which are in  
375 turn linked to the peptide backbone. One possibility for processing the remaining glycopeptide  
376 is that extracellular or surface exo-acting glycosidases remove these core structures, prior to  
377 peptidase action on the naked backbone, or that proteases are able to act on the core  
378 glycosylated backbone to remove glycopeptides for uptake and further processing. This latter  
379 model is supported by recent the recent discovery of a class of glyco-peptidases expressed  
380 by gut microbes, including *B. thetaiotaomicron*, that specifically target O-glycosylated  
381 mucins<sup>43,44</sup>.

382 While much of the O-glycan that colonic microbiota will be exposed to will be from MUC2<sup>45</sup>,  
383 as the major mucin expressed in the distal intestine, it is worth noting that these bacteria will  
384 also come into contact with significant amounts of MUC5AC, MUC5B and MUC6 mucins that  
385 have moved down the digestive tract from the saliva, oesophagus and stomach where they  
386 originated. In addition to gel-forming mucins, gut microbes will be exposed to membrane-  
387 associated mucins that are a part of the apical surface glycocalyx of epithelial cells, especially  
388 when dead cells are sloughed off the epithelium throughout the GI tract and these include  
389 MUC3, MUC12 and MUC17<sup>46,47</sup>. Furthermore, greater than 80 % of secreted proteins are O-  
390 glycosylated and the gut microbiota will come into contact with these from both host and  
391 dietary sources<sup>48</sup>. The PGM and SI used in this study indicate theses microbes can access  
392 the different types of O-glycans moving through the GI tract.

393 Overall, the findings reported here contribute significantly towards the understanding about  
394 the associations between the host and prominent members of the human gut microbiota.  
395 Significantly, we were also able to use these enzymes to produce glycan fragments from  
396 mucins derived from patients and cell lines with different disease states. These findings open  
397 up the exciting possibility of exploiting this activity for characterisation and detection of  
398 biomarkers to allow more effective and earlier diagnosis of diseases such as IBD and CRC,  
399 with the possibility of extending the applications to other mucosal surfaces.

## 400 **Materials and Methods**

401 **Sources of glycans and glycoproteins** TriLacNAc was purchased from Elicityl and the rest  
402 of the defined oligosaccharides were from Carbosynth. PGM II and III (Sigma) was produced  
403 by dissolving in DI water at 50 mg/ml and the precipitate removed by centrifugation before  
404 assays were carried out (leaving 35-40 mg/ml). Porcine small intestinal mucin was prepared  
405 as previously described with the only modification being a double CsCl gradient without  
406 Sepharose separation or SDS Page in between<sup>49</sup>. Keratan was prepared as described  
407 previously<sup>50</sup>.

408

## 409 **Bacterial strains**

410 The *Bacteroides* strains used were: *B. thetaiotaomicron* VPI-5482, *B. fragilis* NCTC9342, *B.*  
411 *caccae* ATCC43185, *B. cellulosilyticus* DSM14838, *B. finegoldii* DSM17565, *B. vulgatus*  
412 ATCC8483, *B. ovatus* ATCC8482, *B. xylanisolvens* XBA1, *B. intestinalis* DSM17393, and  
413 *Akkermansia muciniphila* ATCC BAA835/DSM22959.

414

## 415 **Cloning, expression and purification of recombinant proteins**

416 This was carried out as described in<sup>25</sup>.

417

## 418 **Crystallization**

419 The GH16 enzymes were initially screened using commercial kits (Molecular Dimensions  
420 and Qiagen). Protein concentrations, crystallisation conditions and cryo-protectant used are  
421 given in supplementary table 6. The drops, composed of 0.1 ul of protein solution plus 0.1 or  
422 0.2 ul of reservoir solution, were set up in sitting drop vapour diffusion plates by a Mosquito  
423 crystallization robot and incubated at 20 °C. BACCAC\_02680<sup>GH16E143Q</sup> was incubated with 5  
424 mM of ligand for one hour and co-crystallised. BF4060 crystals were soaked in solution  
425 containing cryo-protectant and 3.5 mM TriLacNAc for 5 minutes prior to flash cooling in liquid  
426 nitrogen.

427

## 428 **Data collection, structure solution, model building, refinement and validation**

429 Data sets were integrated with XDS<sup>51</sup> or DIALS<sup>52</sup> or XIA2<sup>53</sup> and scaled with Aimless<sup>54</sup>. Initial  
430 phases were obtained for Amuc\_0724<sup>GH16</sup> by molecular replacement with Molrep<sup>55</sup> (REF)  
431 using 3WUT and Phaser<sup>56</sup> using a GH16 laminarinase from *Rhodothermus marinus* as  
432 search model (PDB 3ILN) for all the other proteins. Models were refined with refmac<sup>57</sup> and  
433 manual model building with Coot<sup>58</sup>. Final models were validated with MolProbity<sup>59</sup>. The  
434 statistics from data processing and refinement can be found in Supplementary Table X.  
435 Other software used were from CCP4 suite<sup>60</sup> of Phenix suite<sup>61</sup>. Figures were made with  
436 pymol<sup>62</sup>.



437

### 438 **Growth of bacterial species**

439 All growths were carried out in an anaerobic cabinet (Whitley A35 Workstation; Don Whitley).  
440 Glycerol stocks of bacterial were revived overnight in tryptone-yeast-extract-glycerol medium  
441 plus haematin<sup>63</sup>. *A. muciniphila* and *B. xylanisolvens* required chopped meat broth (CMB) at  
442 this stage instead<sup>11,64</sup>. Monitoring growth against different substrates was done in minimal  
443 media for all *Bacteroides* spp.<sup>8</sup>, however for *A. muciniphila* CMB was used without the  
444 addition of monosaccharides. For plate growths, a 96-well plate was monitored at 600 nm for  
445 48 h by a Biotek Epoch plate reader. Growth against monosaccharides and PGM II and III  
446 (precipitate removed) was carried out at 35 and 40 mg/ml, respectively. Growth against  
447 heparan sulfate and chondroitin sulfate was carried out at 20 mg/ml and hyaluronic acid at  
448 10 mg/ml for viscosity reasons.

449

### 450 **Recombinant enzyme assays**

451 For overnight assays, defined oligosaccharides were incubated at a final concentration of 1  
452 mM in the presence of 3  $\mu$ M of enzyme. For substrate depletion assays, 1 mM  
453 oligosaccharides were incubated with 0.1  $\mu$ M enzyme and samples removed at various  
454 times. Some enzymes required increasing to 1  $\mu$ M to assess the activity against substrates.  
455 The concentrations of different substrates are indicated to throughout the figures.

456

### 457 **Thin-layer chromatography**

458 For defined oligosaccharides and other polysaccharides, 3  $\mu$ l of an assay containing 1 mM  
459 substrate was spotted on to silica plates. For assays against mucin, this was increased to 9  
460  $\mu$ l. The plates were resolved in running buffer containing butanol/acetic acid/water (2:1:1)  
461 and stained using a diphenylamine-aniline-phosphoric acid stain<sup>65</sup>.

462

### 463 **Colorectal cancer cell line growth**

464 Human CRC cell lines were obtained from the Department of Surgery of the Leiden  
465 University Medical Center (LUMC), Leiden, The Netherlands. The cell lines cultured at the  
466 LUMC were kept in Hepes-buffered RPMI 1640 culture medium containing L-glutamine and  
467 supplemented with penicillin (5000 IU per mL), streptomycin (5 mg ml<sup>-1</sup>), and 10% (v/v) fetal  
468 calf serum (FCS). Cells were incubated at 37°C with 5% CO<sub>2</sub> in humidified air. The cells  
469 were harvested after reaching approximately 80% of confluence. To detach the cells from  
470 the culture flask a trypsin/EDTA solution in 1X PBS was used. Enzyme activity was stopped  
471 using the medium in a ratio 2:5 (trypsin:medium v/v). The cells were counted using TC20  
472 automated cell counter from Bio-Rad technologies (California, USA) based on trypan blue  
473 staining. The cells were washed twice with 5 mL of 1x PBS, aliquoted to 2.0 x 10<sup>6</sup> cells per

474 mL of 1x PBS and pelleted by centrifuging 3 min at 1500 x g. Finally, the supernatant was  
475 removed, and the cell pellets were stored at -20°C. 2 million cells were used per reaction.  
476

#### 477 **Human sample collection**

478 IBD tissue samples from two subjects were collected as part of the Newcastle Biobank  
479 following written consent according to approval from Newcastle and North Tyneside  
480 Research Ethics Committee 1 (REC:17/NE/0361). Matched ileal and colonic samples were  
481 obtained from one panproctocolectomy for ulcerative colitis and one ileocaecal resection of  
482 Crohn's disease. Samples were transferred on wet ice directly to the laboratory for  
483 mechanical isolation of the mucous layer by gently scraping using a pipette tip. Necrotising  
484 enterocolitis samples were collected as part of the ethically approved SERVIS study and  
485 Great North Neonatal Biobank (approvals 10/H0908/39 and 15-NE-0334). Fresh tissue was  
486 collected from surgically resected specimens when a clinically necessary procedure was  
487 taking part, stored briefly in sterile phosphate buffered saline and transported to the  
488 laboratory on ice.

489

#### 490 **High-performance liquid chromatography with pulsed amphoteric detection (HPAEC- 491 PAD)**

492 To analyse the substrate depletion assays, they were separated using a CARBOPAC PA-  
493 100 anion exchange column with a CARBOPAC PA-100 guard. Flow was 1 ml min<sup>-1</sup> and  
494 elution conditions were 0-10 min, 100 mM NaOH; 10-35 min 100 mM NaOH with a 0-166  
495 mM sodium acetate gradient.

496

#### 497 **Procainamide labelling**

498 Reducing ends of GH16 products were labelled by reductive amination using a procainamide  
499 labelling kit containing sodium cyanoborohydride as reductant (Ludger). Before and after  
500 labelling the O-glycan samples were cleaned up using PBM plates and S-cartridges,  
501 respectively (Ludger).

502

#### 503 **Liquid chromatography-fluorescence detection-electrospray-mass spectrometry 504 analysis of procainamide labelled glycans**

505 Procainamide-labelled samples were analysed by LC-FLD-ESI-MS. 25 µl of sample was  
506 injected to a Waters ACQUITY UPLC Glycan BEH Amide column (2.1 X 150 mm, 1.7 µm  
507 particle size, 130 Å pore size) at 40 °C on a Dionex Ultimate 3000 UHPLC instrument with a  
508 fluorescent detector ( $\lambda_{\text{ex}}$  = 310 nm,  $\lambda_{\text{em}}$  = 370 nm) attached to a Bruker Amazon Speed ETD.  
509 Mobile phase A was a 50 mM ammonium formate solution (pH 4.4) and mobile phase B was  
510 neat acetonitrile. Analyte separation was accomplished by gradients running at a flow rate of

511 0.4 ml.min<sup>-1</sup> from 85 to 57 % mobile phase B over 115 min and from 85 to 62 % over 95 min  
512 for mucin and keratan samples, respectively. The Amazon speed was operated in the  
513 positive sensitivity mode using the following settings: source temperature, 180 °C; gas flow.  
514 41 min<sup>-1</sup>; capillary voltage, 4,500 V; ICC target, 200,000; maximum accumulation time, 50.00  
515 ms; rolling average, 2; number of precursor ions selected, 3; scan mode, enhanced  
516 resolution; mass range scanned, 400 to 1,700.

517

#### 518 **Analysis of mass spectrometry data**

519 Mass spectrometry of procainamide-labelled glycans was analysed using Bruker Compass  
520 Data Analysis Software and GlycoWorkbench<sup>66</sup>. Glycan compositions were elucidated on the  
521 basis of MS<sup>2</sup> fragmentation and previously published data.

522

#### 523 **Bioinformatics**

524 Putative signal sequences were identified using SignalP 5.0<sup>67</sup>. Sequence identities were  
525 determined using Clustal Omega using full sequences<sup>68</sup>. The IMG database was used to  
526 analyse synteny between different species<sup>69</sup>. The CAZy database ([www.cazy.org](http://www.cazy.org)) was used  
527 as the main reference for CAZymes<sup>70</sup>. Alignments and phylogenetic trees were completed in  
528 SeaView<sup>71</sup>. To determine the boundaries between different modules in a protein Pfam<sup>72</sup> and  
529 SMART<sup>73,74</sup> were used.

## 530 **Acknowledgements**

531 We thank Carl Morland (Newcastle University, UK) for his expert technical assistance. We  
532 thank Dr Mirjam Czjzek for her advice on our structural data and interpretation of it and Prof  
533 Robert Hirt for his insightful conversations about phylogenetics. We would like to thank  
534 Diamond Light Source (Oxfordshire, UK) for beamtime (proposal mx18598) and staff of  
535 beamline I03, I04-1 and I24. We are grateful to Newcastle Biobank and NIHR Newcastle  
536 Biomedical Research Centre. Dr Jose Muñoz-Muñoz kindly gifted the arabinogalactan  
537 substrates used. The NEC samples were collected as part of the ethically approved SERVIS  
538 study (REC 10/H0908/39). The colorectal cancer cell lines were from the Department of  
539 Surgery, Leiden University Medical Centre (LUMC), Leiden. The work was funded by  
540 BBSRC/Innovate UK IB catalyst award 'Glycoenzymes for Bioindustries' (BB/M029018/1).

541

## 542 **Contributions**

543 L.I.C. sorted through previously published gene upregulation and protein expression data.  
544 L.I.C. and M.V.L. carried out reactions on defined oligosaccharides and commercial  
545 polysaccharides available. M.V.L. produced catalytic mutants. L.I.C. and M.V.L. purified  
546 proteins for crystallography. M.V.L. and A.B. obtained and harvested crystals, collected data  
547 and solved crystal structures. L.I.C. and M.V.L. carried out comparisons of crystal structures  
548 with ones already present in the database. P.A.U. carried out the LC-MS. L.I.C. analysed the  
549 LC-MS data. P.C. and J.P.P. collected and purified porcine small intestinal mucin. F.Z. and  
550 R.J.L. purified keratan sulfate. R.G and E.C.M supplied the *Bt* PUL knockout strains. L.I.C.  
551 carried out substrate depletion assays, carried out growth experiments with different  
552 bacterial species, completed the phylogenetic analysis, carried out assays against human  
553 samples and assays of with other enzymes used in the report against defined  
554 oligosaccharides. C.A.L., R.R.B., M.D., and S.N. were responsible for ethical approval,  
555 governance, patient identification and sample collection for IBD tissues. R.R.B. performed  
556 surgery where adult intestinal samples were collected. K.C. and C.A.L. were responsible for  
557 lab preparation of IBD tissue. C.J.S. and J.E.B were responsible for ethical approval and  
558 provision of samples for the preterm neonate NEC samples. J.E.B performed the neonate  
559 surgery. K.M. prepared the colorectal cancer cells. L.I.C. and D.N.B designed the  
560 experiments, analysed the data and wrote the manuscript.

561

## 562 **Data availability**

563 The crystal structures are deposited in the Protein Data Bank under the accession numbers  
564 6T2N, 6T2O, 6T2P, 6T2Q, 6T2R and 6T2S. The other data that supports the findings in this  
565 paper are available upon request from the corresponding authors.

566

- 567 1 Johansson, M. E., Sjovall, H. & Hansson, G. C. The gastrointestinal mucus system in health  
568 and disease. *Nature reviews. Gastroenterology & hepatology* **10**, 352-361,  
569 doi:10.1038/nrgastro.2013.35 (2013).
- 570 2 Lang, T., Hansson, G. C. & Samuelsson, T. Gel-forming mucins appeared early in metazoan  
571 evolution. *Proceedings of the National Academy of Sciences of the United States of America*  
572 **104**, 16209-16214, doi:10.1073/pnas.0705984104 (2007).
- 573 3 Johansson, M. E. & Hansson, G. C. Immunological aspects of intestinal mucus and mucins.  
574 *Nature reviews. Immunology* **16**, 639-649, doi:10.1038/nri.2016.88 (2016).
- 575 4 Larsson, J. M., Karlsson, H., Sjovall, H. & Hansson, G. C. A complex, but uniform O-  
576 glycosylation of the human MUC2 mucin from colonic biopsies analyzed by nanoLC/MSn.  
577 *Glycobiology* **19**, 756-766, doi:10.1093/glycob/cwp048 (2009).
- 578 5 Forster, S. C. *et al.* A human gut bacterial genome and culture collection for improved  
579 metagenomic analyses. *Nature biotechnology* **37**, 186-192, doi:10.1038/s41587-018-0009-7  
580 (2019).
- 581 6 Derrien, M., Vaughan, E. E., Plugge, C. M. & de Vos, W. M. *Akkermansia muciniphila* gen.  
582 nov., sp. nov., a human intestinal mucin-degrading bacterium. *Int J Syst Evol Microbiol* **54**,  
583 1469-1476, doi:10.1099/ij.s.0.02873-0 (2004).
- 584 7 Martens, E. C., Roth, R., Heuser, J. E. & Gordon, J. I. Coordinate regulation of glycan  
585 degradation and polysaccharide capsule biosynthesis by a prominent human gut symbiont.  
586 *The Journal of biological chemistry* **284**, 18445-18457, doi:10.1074/jbc.M109.008094 (2009).
- 587 8 Martens, E. C., Chiang, H. C. & Gordon, J. I. Mucosal glycan foraging enhances fitness and  
588 transmission of a saccharolytic human gut bacterial symbiont. *Cell host & microbe* **4**, 447-  
589 457, doi:10.1016/j.chom.2008.09.007 (2008).
- 590 9 Martens, E. C. *et al.* Recognition and degradation of plant cell wall polysaccharides by two  
591 human gut symbionts. *PLoS Biol* **9**, e1001221, doi:10.1371/journal.pbio.1001221 (2011).
- 592 10 Marcobal, A. *et al.* Bacteroides in the infant gut consume milk oligosaccharides via mucus-  
593 utilization pathways. *Cell host & microbe* **10**, 507-514, doi:10.1016/j.chom.2011.10.007  
594 (2011).
- 595 11 Desai, M. S. *et al.* A Dietary Fiber-Deprived Gut Microbiota Degrades the Colonic Mucus  
596 Barrier and Enhances Pathogen Susceptibility. *Cell* **167**, 1339-1353.e1321,  
597 doi:10.1016/j.cell.2016.10.043 (2016).
- 598 12 Egan, M. *et al.* Cross-feeding by *Bifidobacterium breve* UCC2003 during co-cultivation with  
599 *Bifidobacterium bifidum* PRL2010 in a mucin-based medium. *BMC microbiology* **14**, 282,  
600 doi:10.1186/s12866-014-0282-7 (2014).

- 601 13 Schroeder, B. O. *et al.* Bifidobacteria or Fiber Protects against Diet-Induced Microbiota-  
602 Mediated Colonic Mucus Deterioration. *Cell host & microbe* **23**, 27-40.e27,  
603 doi:10.1016/j.chom.2017.11.004 (2018).
- 604 14 Corfield, A. P. The Interaction of the Gut Microbiota with the Mucus Barrier in Health and  
605 Disease in Human. *Microorganisms* **6**, doi:10.3390/microorganisms6030078 (2018).
- 606 15 Marcobal, A., Southwick, A. M., Earle, K. A. & Sonnenburg, J. L. A refined palate: bacterial  
607 consumption of host glycans in the gut. *Glycobiology* **23**, 1038-1046,  
608 doi:10.1093/glycob/cwt040 (2013).
- 609 16 Cuskin, F. *et al.* Human gut Bacteroidetes can utilize yeast mannan through a selfish  
610 mechanism. *Nature* **517**, 165-169, doi:10.1038/nature13995 (2015).
- 611 17 Koropatkin, N. M., Martens, E. C., Gordon, J. I. & Smith, T. J. Starch catabolism by a  
612 prominent human gut symbiont is directed by the recognition of amylose helices. *Structure*  
613 (*London, England : 1993*) **16**, 1105-1115, doi:10.1016/j.str.2008.03.017 (2008).
- 614 18 Rogowski, A. *et al.* Glycan complexity dictates microbial resource allocation in the large  
615 intestine. *Nature communications* **6**, 7481, doi:10.1038/ncomms8481 (2015).
- 616 19 Pudlo, N. A. *et al.* Symbiotic Human Gut Bacteria with Variable Metabolic Priorities for Host  
617 Mucosal Glycans. *MBio* **6**, e01282-01215, doi:10.1128/mBio.01282-15 (2015).
- 618 20 Ottman, N. *et al.* Genome-Scale Model and Omics Analysis of Metabolic Capacities of  
619 *Akkermansia muciniphila* Reveal a Preferential Mucin-Degrading Lifestyle. *Applied and*  
620 *environmental microbiology* **83**, doi:10.1128/aem.01014-17 (2017).
- 621 21 Ottman, N. *et al.* Characterization of Outer Membrane Proteome of *Akkermansia*  
622 *muciniphila* Reveals Sets of Novel Proteins Exposed to the Human Intestine. *Frontiers in*  
623 *microbiology* **7**, 1157, doi:10.3389/fmicb.2016.01157 (2016).
- 624 22 Shin, J. *et al.* Elucidation of *Akkermansia muciniphila* Probiotic Traits Driven by Mucin  
625 Depletion. *Frontiers in microbiology* **10**, 1137, doi:10.3389/fmicb.2019.01137 (2019).
- 626 23 Viborg, A. H. *et al.* A subfamily roadmap for functional glycogenomics of the evolutionarily  
627 diverse Glycoside Hydrolase Family 16 (GH16). *The Journal of biological chemistry*,  
628 doi:10.1074/jbc.RA119.010619 (2019).
- 629 24 Katayama, T. *et al.* Molecular cloning and characterization of *Bifidobacterium bifidum* 1,2-  
630 alpha-L-fucosidase (AfcA), a novel inverting glycosidase (glycoside hydrolase family 95).  
631 *Journal of bacteriology* **186**, 4885-4893, doi:10.1128/jb.186.15.4885-4893.2004 (2004).
- 632 25 Briliute, J. *et al.* Complex N-glycan breakdown by gut *Bacteroides* involves an extensive  
633 enzymatic apparatus encoded by multiple co-regulated genetic loci. *Nature microbiology* **4**,  
634 1571-1581, doi:10.1038/s41564-019-0466-x (2019).



- 635 26 Hehemann, J. H. *et al.* Biochemical and structural characterization of the complex agarolytic  
636 enzyme system from the marine bacterium *Zobellia galactanivorans*. *The Journal of*  
637 *biological chemistry* **287**, 30571-30584, doi:10.1074/jbc.M112.377184 (2012).
- 638 27 Mark, P. *et al.* Analysis of nasturtium TmNXG1 complexes by crystallography and molecular  
639 dynamics provides detailed insight into substrate recognition by family GH16 xyloglucan  
640 endo-transglycosylases and endo-hydrolases. *Proteins* **75**, 820-836, doi:10.1002/prot.22291  
641 (2009).
- 642 28 Labourel, A. *et al.* The beta-glucanase ZgLamA from *Zobellia galactanivorans* evolved a bent  
643 active site adapted for efficient degradation of algal laminarin. *The Journal of biological*  
644 *chemistry* **289**, 2027-2042, doi:10.1074/jbc.M113.538843 (2014).
- 645 29 Tempel, W. *et al.* Three-dimensional structure of GlcNAc $\alpha$ 1-4Gal releasing endo-beta-  
646 galactosidase from *Clostridium perfringens*. *Proteins* **59**, 141-144, doi:10.1002/prot.20363  
647 (2005).
- 648 30 Matard-Mann, M. *et al.* Structural insights into marine carbohydrate degradation by family  
649 GH16 kappa-carrageenases. *The Journal of biological chemistry* **292**, 19919-19934,  
650 doi:10.1074/jbc.M117.808279 (2017).
- 651 31 Jeng, W. Y., Wang, N. C., Lin, C. T., Shyur, L. F. & Wang, A. H. Crystal structures of the  
652 laminarinase catalytic domain from *Thermotoga maritima* MSB8 in complex with inhibitors:  
653 essential residues for beta-1,3- and beta-1,4-glucan selection. *The Journal of biological*  
654 *chemistry* **286**, 45030-45040, doi:10.1074/jbc.M111.271213 (2011).
- 655 32 Hehemann, J. H. *et al.* Transfer of carbohydrate-active enzymes from marine bacteria to  
656 Japanese gut microbiota. *Nature* **464**, 908-912, doi:10.1038/nature08937 (2010).
- 657 33 Hsueh, W. *et al.* Neonatal necrotizing enterocolitis: clinical considerations and pathogenetic  
658 concepts. *Pediatric and developmental pathology : the official journal of the Society for*  
659 *Pediatric Pathology and the Paediatric Pathology Society* **6**, 6-23, doi:10.1007/s10024-002-  
660 0602-z (2003).
- 661 34 Brody, H. Colorectal cancer. *Nature* **521**, S1, doi:10.1038/521S1a (2015).
- 662 35 Zamani, M., Hosseini, S. V. & Mokarram, P. Epigenetic biomarkers in colorectal cancer:  
663 premises and prospects. *Biomarkers : biochemical indicators of exposure, response, and*  
664 *susceptibility to chemicals* **23**, 105-114, doi:10.1080/1354750x.2016.1252961 (2018).
- 665 36 Gao, N. *et al.* Loss of intestinal O-glycans promotes spontaneous duodenal tumors. *American*  
666 *journal of physiology. Gastrointestinal and liver physiology* **311**, G74-83,  
667 doi:10.1152/ajpgi.00060.2016 (2016).

- 668 37 Bergstrom, K. S. & Xia, L. Mucin-type O-glycans and their roles in intestinal homeostasis.  
669 *Glycobiology* **23**, 1026-1037, doi:10.1093/glycob/cwt045 (2013).
- 670 38 Velcich, A. *et al.* Colorectal cancer in mice genetically deficient in the mucin Muc2. *Science*  
671 *(New York, N.Y.)* **295**, 1726-1729, doi:10.1126/science.1069094 (2002).
- 672 39 Van der Sluis, M. *et al.* Muc2-deficient mice spontaneously develop colitis, indicating that  
673 MUC2 is critical for colonic protection. *Gastroenterology* **131**, 117-129,  
674 doi:10.1053/j.gastro.2006.04.020 (2006).
- 675 40 Fu, J. *et al.* Loss of intestinal core 1-derived O-glycans causes spontaneous colitis in mice. *The*  
676 *Journal of clinical investigation* **121**, 1657-1666, doi:10.1172/jci45538 (2011).
- 677 41 An, G. *et al.* Increased susceptibility to colitis and colorectal tumors in mice lacking core 3-  
678 derived O-glycans. *The Journal of experimental medicine* **204**, 1417-1429,  
679 doi:10.1084/jem.20061929 (2007).
- 680 42 Tailford, L. E., Crost, E. H., Kavanaugh, D. & Juge, N. Mucin glycan foraging in the human gut  
681 microbiome. *Frontiers in genetics* **6**, 81, doi:10.3389/fgene.2015.00081 (2015).
- 682 43 Noach, I. *et al.* Recognition of protein-linked glycans as a determinant of peptidase activity.  
683 *Proceedings of the National Academy of Sciences of the United States of America* **114**, E679-  
684 e688, doi:10.1073/pnas.1615141114 (2017).
- 685 44 Nakjang, S., Ndeh, D. A., Wipat, A., Bolam, D. N. & Hirt, R. P. A novel extracellular  
686 metallopeptidase domain shared by animal host-associated mutualistic and pathogenic  
687 microbes. *PloS one* **7**, e30287, doi:10.1371/journal.pone.0030287 (2012).
- 688 45 Gum, J. R., Jr., Hicks, J. W., Toribara, N. W., Siddiki, B. & Kim, Y. S. Molecular cloning of  
689 human intestinal mucin (MUC2) cDNA. Identification of the amino terminus and overall  
690 sequence similarity to prepro-von Willebrand factor. *The Journal of biological chemistry* **269**,  
691 2440-2446 (1994).
- 692 46 Schneider, H. *et al.* The human transmembrane mucin MUC17 responds to TNFalpha by  
693 increased presentation at the plasma membrane. *The Biochemical journal*,  
694 doi:10.1042/bcj20190180 (2019).
- 695 47 Hansson, G. C. Mucus and mucins in diseases of the intestinal and respiratory tracts. *J Intern*  
696 *Med*, doi:10.1111/joim.12910 (2019).
- 697 48 Steentoft, C. *et al.* Precision mapping of the human O-GalNAc glycoproteome through  
698 SimpleCell technology. *The EMBO journal* **32**, 1478-1488, doi:10.1038/emboj.2013.79  
699 (2013).
- 700 49 Fogg, F. J. *et al.* Characterization of pig colonic mucins. *The Biochemical journal* **316 ( Pt 3)**,  
701 937-942, doi:10.1042/bj3160937 (1996).

- 702 50 Fu, L. *et al.* Keratan sulfate glycosaminoglycan from chicken egg white. *Glycobiology* **26**, 693-  
703 700, doi:10.1093/glycob/cww017 (2016).
- 704 51 Kabsch, W. XDS. *Acta crystallographica. Section D, Biological crystallography* **66**, 125-132,  
705 doi:10.1107/s0907444909047337 (2010).
- 706 52 Winter, G. *et al.* DIALS: implementation and evaluation of a new integration package. *Acta*  
707 *crystallographica. Section D, Structural biology* **74**, 85-97, doi:10.1107/s2059798317017235  
708 (2018).
- 709 53 Winter, G., Lobley, C. M. & Prince, S. M. Decision making in xia2. *Acta crystallographica.*  
710 *Section D, Biological crystallography* **69**, 1260-1273, doi:10.1107/s0907444913015308  
711 (2013).
- 712 54 Evans, P. Scaling and assessment of data quality. *Acta crystallographica. Section D, Biological*  
713 *crystallography* **62**, 72-82, doi:10.1107/s0907444905036693 (2006).
- 714 55 Vagin, A. & Teplyakov, A. Molecular replacement with MOLREP. *Acta crystallographica.*  
715 *Section D, Biological crystallography* **66**, 22-25, doi:10.1107/s0907444909042589 (2010).
- 716 56 McCoy, A. J. *et al.* Phaser crystallographic software. *J Appl Crystallogr* **40**, 658-674,  
717 doi:10.1107/s0021889807021206 (2007).
- 718 57 Murshudov, G. N. *et al.* REFMAC5 for the refinement of macromolecular crystal structures.  
719 *Acta crystallographica. Section D, Biological crystallography* **67**, 355-367,  
720 doi:10.1107/s0907444911001314 (2011).
- 721 58 Emsley, P., Lohkamp, B., Scott, W. G. & Cowtan, K. Features and development of Coot. *Acta*  
722 *crystallographica. Section D, Biological crystallography* **66**, 486-501,  
723 doi:10.1107/s0907444910007493 (2010).
- 724 59 Chen, V. B. *et al.* MolProbity: all-atom structure validation for macromolecular  
725 crystallography. *Acta crystallographica. Section D, Biological crystallography* **66**, 12-21,  
726 doi:10.1107/s0907444909042073 (2010).
- 727 60 The CCP4 suite: programs for protein crystallography. *Acta crystallographica. Section D,*  
728 *Biological crystallography* **50**, 760-763, doi:10.1107/s0907444994003112 (1994).
- 729 61 Adams, P. D. *et al.* PHENIX: a comprehensive Python-based system for macromolecular  
730 structure solution. *Acta crystallographica. Section D, Biological crystallography* **66**, 213-221,  
731 doi:10.1107/s0907444909052925 (2010).
- 732 62 The PyMOL Molecular Graphics System, Version 2.0 Schrödinger, LLC. .
- 733 63 Larsbrink, J. *et al.* A discrete genetic locus confers xyloglucan metabolism in select human  
734 gut Bacteroidetes. *Nature* **506**, 498-502, doi:10.1038/nature12907 (2014).

- 735 64 Hehemann, J. H., Kelly, A. G., Pudlo, N. A., Martens, E. C. & Boraston, A. B. Bacteria of the  
736 human gut microbiome catabolize red seaweed glycans with carbohydrate-active enzyme  
737 updates from extrinsic microbes. *Proceedings of the National Academy of Sciences of the*  
738 *United States of America* **109**, 19786-19791, doi:10.1073/pnas.1211002109 (2012).
- 739 65 Zhang, Z., Xie, J., Zhang, F. & Linhardt, R. J. Thin-layer chromatography for the analysis of  
740 glycosaminoglycan oligosaccharides. *Anal Biochem* **371**, 118-120,  
741 doi:10.1016/j.ab.2007.07.003 (2007).
- 742 66 Ceroni, A. *et al.* GlycoWorkbench: a tool for the computer-assisted annotation of mass  
743 spectra of glycans. *J Proteome Res* **7**, 1650-1659, doi:10.1021/pr7008252 (2008).
- 744 67 Almagro Armenteros, J. J. *et al.* SignalP 5.0 improves signal peptide predictions using deep  
745 neural networks. *Nature biotechnology* **37**, 420-423, doi:10.1038/s41587-019-0036-z (2019).
- 746 68 Sievers, F. *et al.* Fast, scalable generation of high-quality protein multiple sequence  
747 alignments using Clustal Omega. *Mol Syst Biol* **7**, 539, doi:10.1038/msb.2011.75 (2011).
- 748 69 Markowitz, V. M. *et al.* IMG: the Integrated Microbial Genomes database and comparative  
749 analysis system. *Nucleic acids research* **40**, D115-122, doi:10.1093/nar/gkr1044 (2012).
- 750 70 Lombard, V., Golaconda Ramulu, H., Drula, E., Coutinho, P. M. & Henrissat, B. The  
751 carbohydrate-active enzymes database (CAZy) in 2013. *Nucleic acids research* **42**, D490-495,  
752 doi:10.1093/nar/gkt1178 (2014).
- 753 71 Gouy, M., Guindon, S. & Gascuel, O. SeaView version 4: A multiplatform graphical user  
754 interface for sequence alignment and phylogenetic tree building. *Molecular biology and*  
755 *evolution* **27**, 221-224, doi:10.1093/molbev/msp259 (2010).
- 756 72 El-Gebali, S. *et al.* The Pfam protein families database in 2019. *Nucleic acids research*,  
757 doi:10.1093/nar/gky995 (2018).
- 758 73 Letunic, I. & Bork, P. 20 years of the SMART protein domain annotation resource. *Nucleic*  
759 *acids research* **46**, D493-d496, doi:10.1093/nar/gkx922 (2018).
- 760 74 Letunic, I., Doerks, T. & Bork, P. SMART: recent updates, new developments and status in  
761 2015. *Nucleic acids research* **43**, D257-260, doi:10.1093/nar/gku949 (2015).

762

763

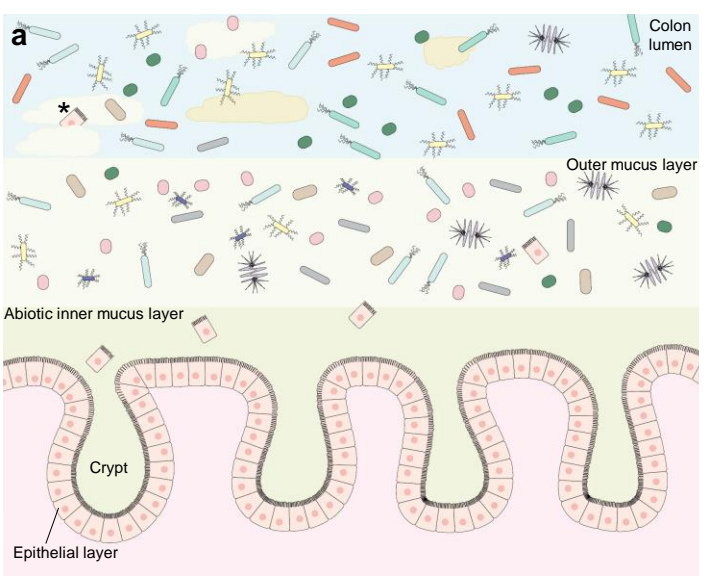

\*Mucins and sloughed off host cells from further up GI tract

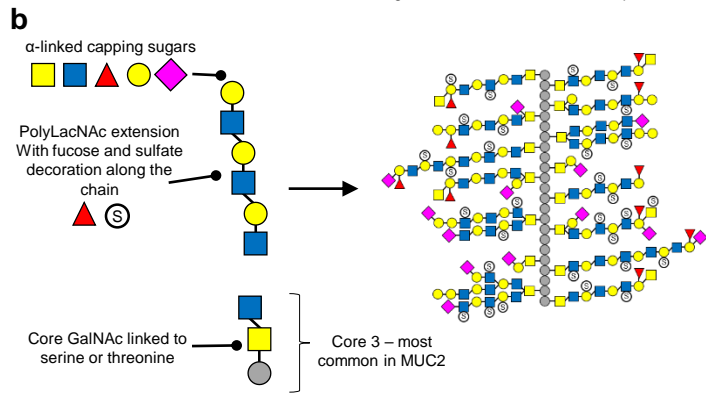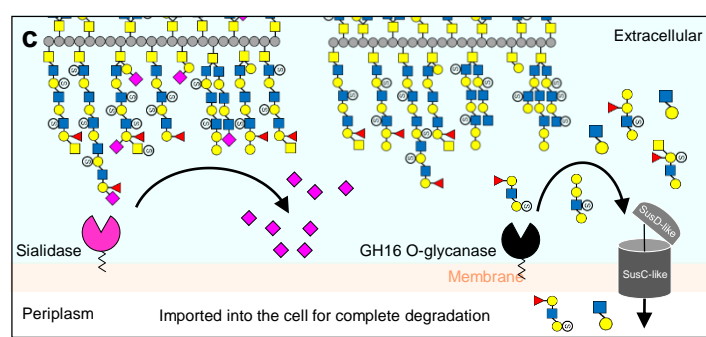

◆ Neu5Ac 
 ■ GlcNAc 
 ▲ Fucose 
 ● Galactose 
 ■ GalNAc 
 (S) Sulfation 
 ● Amino acid

**Figure 1 | Overview of the mucosal layer in the human colon and the glycan structures in mucins from the GI tract**  
**a.** A cross section through the colon showing the two layers of the major mucin MUC2. The lower layer is highly viscous and impenetrable to bacteria and protects the epithelial cells. The upper layer thicker, but less viscous, facilitating lubrication of the colon contents and colonisation by a subset of the normal microbiota.  
**b.** The left hand side shows the core structures that compose a model mucin O-glycan chain. All mucin oligosaccharides are linked via an  $\alpha$ -GalNAc to serine and threonine residues in the peptide backbone. The cores are then often extended with polyLacNAc repeats of varying lengths which are decorated along their length by sulfation and fucosylation and capped at the non-reducing end by a variety of  $\alpha$ -linked monosaccharides. On the right is a model of an intestinal mucin showing complexity and variability of glycan chains attached to peptide backbone.  
**c.** A model of the initial steps of O-glycan degradation on the surface of *Bacteroides* spp. Sialic acid is removed by surface-localised sialidase and the GH16 enzyme removes sections of O-glycan for import into the cell for further degradation.

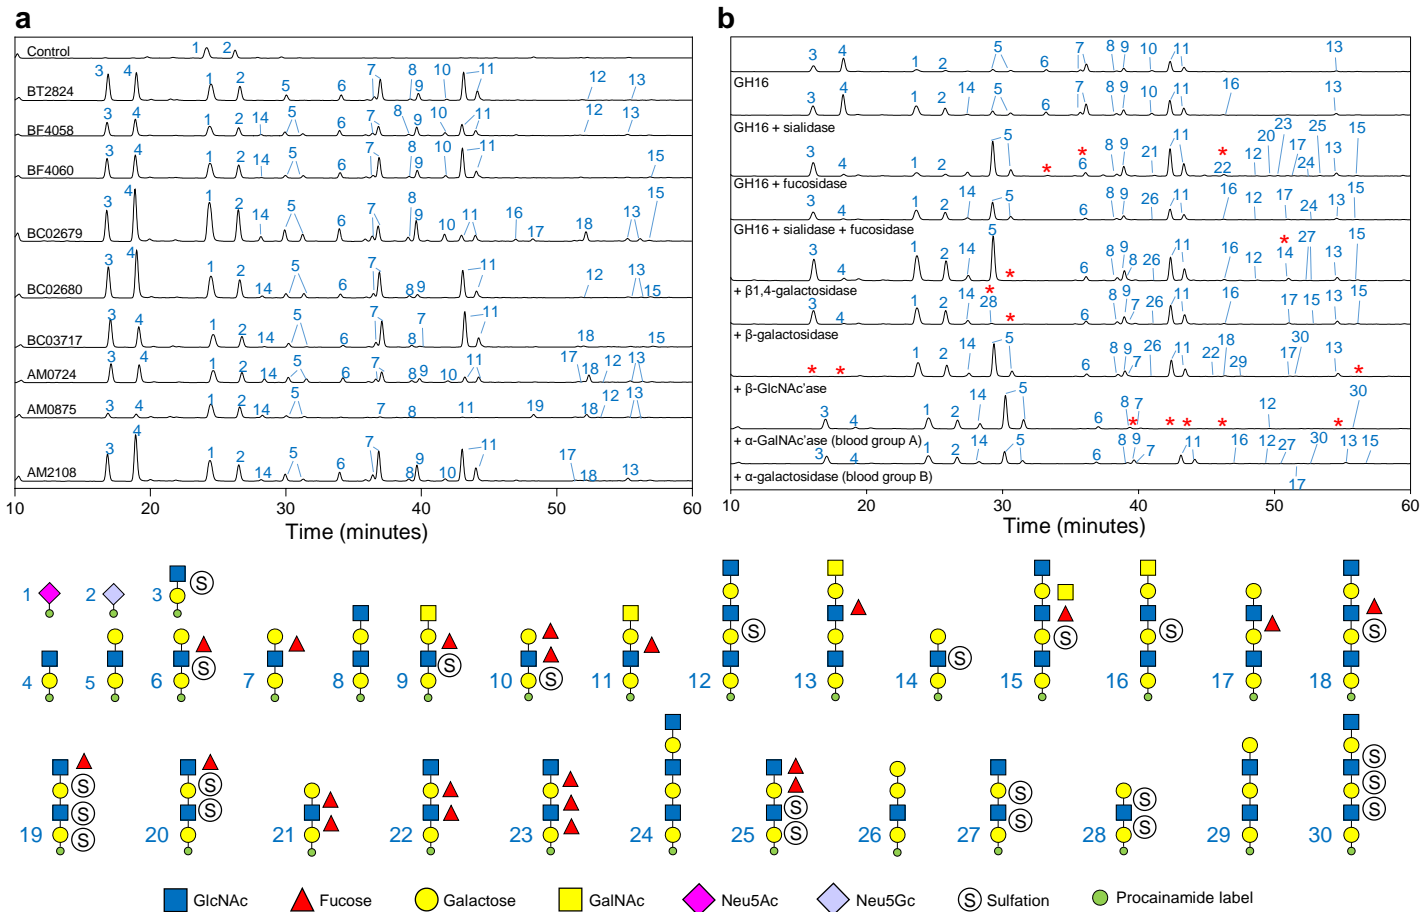



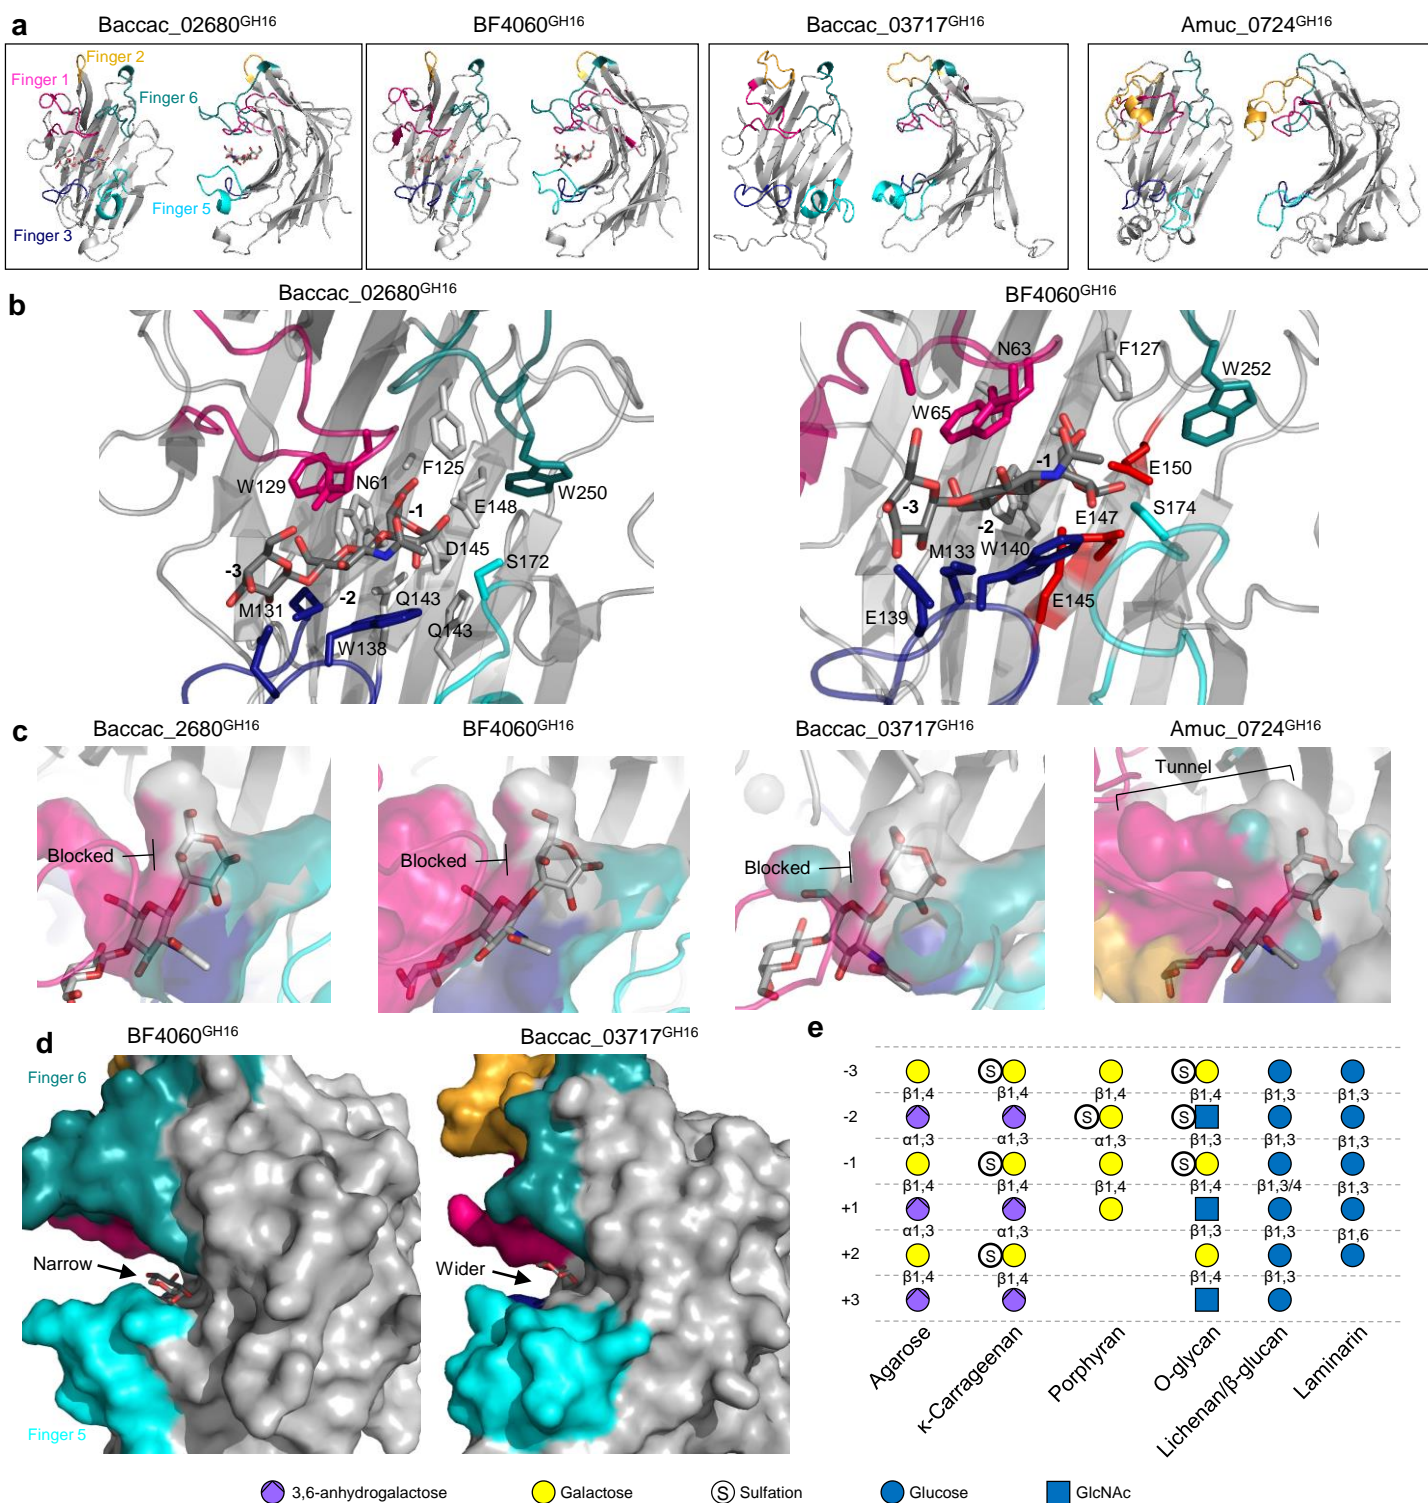

**Figure 3 | Structures of four of the O-glycan active GH16 family members characterised in this study** **a**, Crystal structures of Baccac\_02680<sup>GH16E143Q</sup>, BF4060<sup>GH16</sup>, Baccac\_03717<sup>GH16</sup>, and Amuc\_0724<sup>GH16</sup>. The loops extending from the active site that are proposed to be involved in substrate specificity in GH16 enzymes are termed 'fingers' and are colour coded. **b**, Subsites -1 to -3 of Baccac\_02680<sup>GH16E143Q</sup> and BF4060<sup>GH16</sup> have the product of TriLacNAc cleavage bound (Galβ1,4GlcNAcβ1,3Gal). The residues interacting directly with sugar are shown as sticks. The aromatic residues shared with β-glucanase GH16 family members that drive specificity for a β1,3 between the -1 and -2 sugars are shown (insert numbers here; See Supplementary Fig. 17 for active sites of Baccac\_03717<sup>GH16</sup>, and Amuc\_0724<sup>GH16</sup>). **c**, A surface representation of the regions surrounding the -1 subsite showing the selection for the axial O4 of Gal in the three *Bacteroides* enzymes, while Amuc\_0724 has a more open 'tunnel' like space that appears to also allow accommodation of the equatorial O4 of Glc. The product from Baccac\_02680<sup>GH16E143Q</sup> was overlaid in the Baccac\_03717<sup>GH16</sup>, and Amuc\_0724<sup>GH16</sup> structures. Colours represent the different 'fingers'. **d**, A view of the predicted positive subsites of BF4060<sup>GH16</sup> and Baccac\_03717<sup>GH16</sup> overlaid with the glucose from the +1 subsite of a laminarinase from *Phanerochaete chrysosporium*. The positive subsites are much more closed for BF4060<sup>GH16</sup> and Baccac\_02680<sup>GH16E143Q</sup> compared to Baccac\_03717<sup>GH16</sup>, and Amuc\_0724<sup>GH16</sup> (Supplementary Fig. 17). **e**, An overview of the monosaccharides occupying the different subsites in GH16 family members with different activities. Linkages also shown.

## a Ulcerative colitis samples

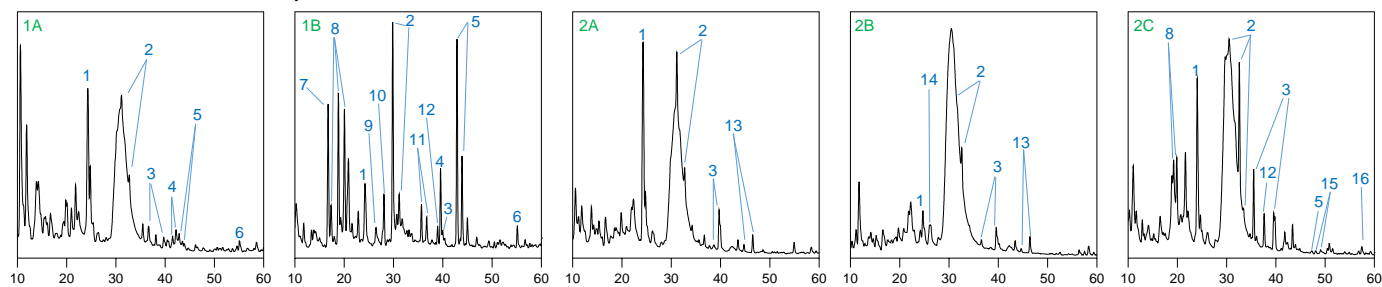

## b Necrotising enterocolitis samples

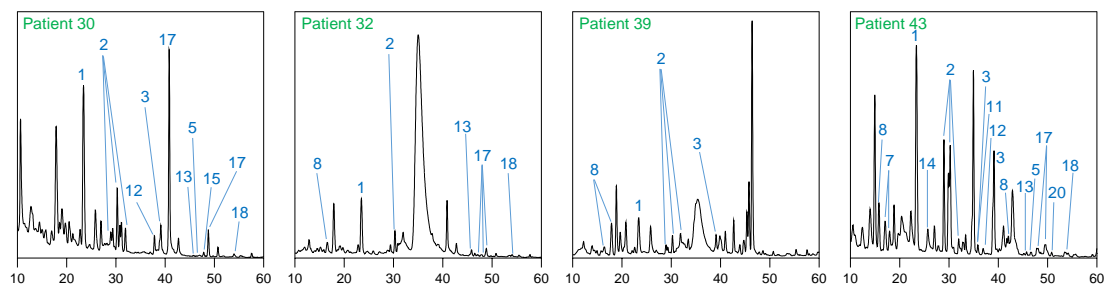

## c Colorectal cancer cell lines

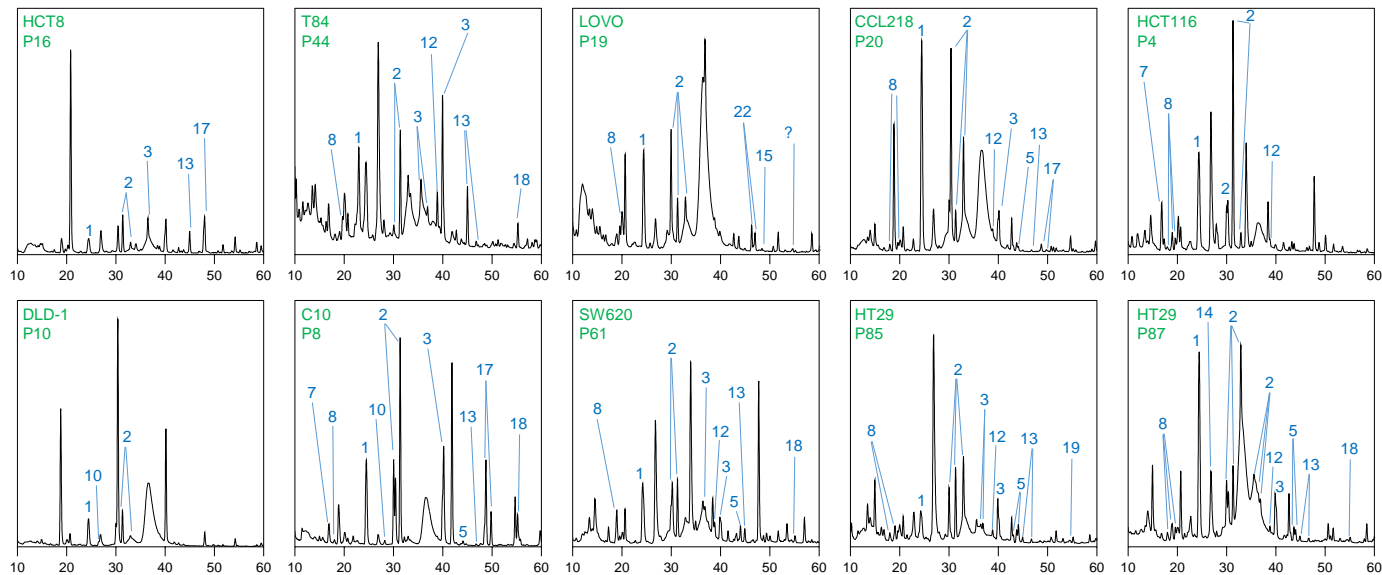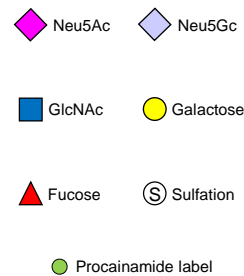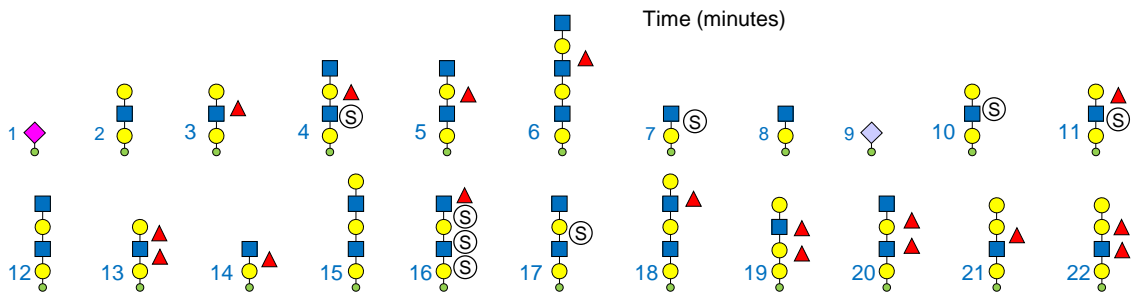

**Figure 4 | Products released from human mucins by Amuc\_0724<sup>GH16</sup> O-glycanase.** Products of mucin digestion were labelled with procainamide at the reducing end and analysed by LC-FLD-ESI-MS. All samples were pre-treated with the broad acting sialidase BT0455<sup>GH33</sup> **a**, Products of GH16 digestion of mucin samples from two patients with ulcerative colitis. Patient 1 had a laproscopic panproctocolectomy and all removed colon was inflamed. Sample 1A is uninflamed ileum and 1B from inflamed colon. Patient 2 had a laprascopic ileocaecal resection. Sample 2A inflamed ileum (bowel terminal ileum), 2B from uninflamed ileum (near small bowel staple line) and 2C from uninflamed colon (ascending). **b**, Mucin from neonates with necrotising enterocolitis. Each sample is a different patient **c**, Mucin from colorectal cancer cell lines. Small amounts of Neu5Gc are seen in some of the ulcerative colitis samples (e.g. 1A) suggesting either the presence of contaminating dietary animal O-glycans remaining in the mucus layer or that this xenobiotic sugar has been incorporated into human mucins from dietary sources.
