# Supplementary material for: Prominent members of the human gut microbiota express endo-acting O-glycanases to initiate mucin breakdown
Source: bioRxiv or medRxiv preprint supplement (doi:10.1101/835843), 2019-11-09
Supplement: Supplementary file [file media-1.pdf]

1 **Prominent members of the human gut microbiota express endo-acting O-**  
2 **glycanases to initiate mucin breakdown**

3  
4 Lucy I. Crouch<sup>1\*</sup>, Marcelo V. Liberato<sup>2</sup>, Paulina A. Urbanowicz<sup>3</sup>, Arnaud Baslé<sup>1</sup>, Christopher  
5 A. Lamb<sup>6</sup>, Christopher J. Stewart<sup>4</sup>, Katie Cooke<sup>4</sup>, Mary Doona<sup>6</sup>, Stephanie Needham<sup>7</sup>,  
6 Richard R. Brady<sup>6</sup>, Janet E. Berrington<sup>8</sup>, Katarina Madunic<sup>9</sup>, Manfred Wuhrer<sup>9</sup>, Peter  
7 Chater<sup>1</sup>, Jeffery P. Pearson<sup>1</sup>, Robert Glowacki<sup>10</sup>, Eric C. Martens<sup>10</sup>, Fuming Zhang<sup>11</sup>, Robert  
8 J. Linhardt<sup>11</sup>, Daniel I. R. Spencer<sup>3</sup> and David N. Bolam<sup>1\*</sup>  
9

10 <sup>1</sup> Institute of Cell and Molecular Biosciences, Newcastle University, Newcastle upon Tyne,  
11 UK.

12 <sup>2</sup> Universidade de Sorocaba, Programa de Processos Tecnológicos e Ambientais,  
13 Sorocaba, SP, Brasil.

14 <sup>3</sup> Ludger Ltd, Culham Science Centre, Abingdon, UK.

15 <sup>4</sup> Institute of Cellular Medicine, Newcastle University, Newcastle upon Tyne, UK.

16 <sup>5</sup> Department of Colorectal Surgery, Newcastle upon Tyne Hospitals NHS Foundation Trust,  
17 Newcastle upon Tyne, UK.

18 <sup>6</sup> Department of Gastroenterology, Newcastle upon Tyne Hospitals NHS Foundation Trust,  
19 Newcastle upon Tyne, UK.

20 <sup>7</sup> Department of Histopathology, Newcastle upon Tyne Hospitals NHS Foundation Trust,  
21 Newcastle upon Tyne, UK.

22 <sup>8</sup> Newcastle Neonatal Service, Royal Victoria Infirmary, Newcastle upon Tyne, UK.

23 <sup>9</sup> Centre for Proteomics and Metabolomics, Leiden University Medical Centre, Leiden,  
24 Netherlands.

25 <sup>10</sup> Department of Microbiology and Immunology, University of Michigan Medical School, Ann  
26 Arbor, MI, USA.

27 <sup>11</sup> Department of Chemistry and Chemical Biology, Centre for Biotechnology and  
28 Interdisciplinary Studies, Rensselaer Polytechnic Institute, Troy, NY 12180, USA.

29  
30 \*To whom correspondence should, be addressed: [david.bolam@ncl.ac.uk](mailto:david.bolam@ncl.ac.uk) or  
31 [lucy.crouch@ncl.ac.uk](mailto:lucy.crouch@ncl.ac.uk).

## 32 **Supplementary Information**

33

### 34 **Mucin substrates and structures**

35 Commercially available PGM substrates dissolved in pure water were too opaque to monitor  
36 growth through optical density. However, centrifugation to remove precipitate produced a  
37 substrate that could be used in for growth experiments. 70 and 80 % of the original dry mass  
38 remained in the soluble portion of PGM type II and III, respectively. Incubations of an O-  
39 glycan active enzyme against the precipitate and soluble fractions showed that the majority  
40 of accessible substrate was in the soluble fractions (Supplementary Fig. 20). The soluble  
41 fraction and precipitate were also incubated with polysaccharide lyases previously  
42 characterised or predicted to have activity against HS, CS and HA<sup>1-3</sup>. The results indicate  
43 that these polysaccharides also remain in the soluble fraction (Supplementary Fig. 20)

44

45 The mucous surface of the colon is composed of two layers. The dense inner mucus layer of  
46 the colon is an abiotic environment formed by MUC2 still attached to the luminal epithelial  
47 cells to protect them from any contact with the HGM. The upper layer is formed from MUC2  
48 released from the inner layer and is niche to some species of the HGM that can access host  
49 glycans as a food source<sup>4</sup>. The upper layer is renewed from the inner layer every 1-2  
50 hours<sup>5,6</sup> and there is a close association between this process and commensal microbes,  
51 which has been demonstrated in germ-free mice where the mucin was observed to remain  
52 attached to the goblet cell rather than being released<sup>7</sup>. This indicates that the HGM  
53 promotes the production of healthy mucus barrier and highlights the mutualistic relationship  
54 between host and HGM<sup>8</sup>.

55

56 Previous characterisation of the O-glycans of MUC2 from human sigmoid colon samples  
57 showed over 100 different structures, but general trends included mono- to tri-sialylation,  
58 predominantly core 3 structures, sulfation predominantly on galactose, fucose predominantly  
59 on GlcNAc (both Lewis a and x structures, decorating the chains and not capping), low  
60 occurrence of blood group sugars and elongation of up to three LacNAcs<sup>9</sup>. Blood group  
61 epitopes have been found to be more common in other mucins, such as salivary, respiratory  
62 and cervical<sup>10-12</sup>. This means that the variability would be relatively low between individuals  
63 and allow for selection of particular mutualists. The stomach mucin is predominantly  
64 Muc5AC and Muc6 and both are characterised as having a capping  $\alpha$ 1,4-GlcNAc<sup>13</sup>, but only  
65 Muc5AC has Lewis b structures<sup>14</sup>. A large diversity in chain length and composition of  
66 gastric O-glycans has also been noted, with many structures seemingly specific to an  
67 individual<sup>15</sup>.

68

## 69 **Gene upregulation and protein expression data sets used in the literature**

70 Two gene upregulation data sets were used for *B. thetaiotamicron* from two different points  
71 of growth (early and late phase) on mucin O-glycans from PGM type III relative to glucose  
72 (Supplementary Fig. 1)<sup>3</sup>. Single gene upregulation data sets were included for *B. fragilis* and  
73 *B. caccae* also grown on mucin O-glycans from PGM III relative to glucose<sup>16,17</sup>  
74 (Supplementary Fig. 2). Five different datasets were used to look at upregulated genes from  
75 *A. muciniphila* (Supplementary Fig. 3). The different reports containing the datasets state  
76 that either strain ATCC BAA835 or DSM22959 were used but these are the same strains  
77 from different banks. There were two data sets originated from the same report, one  
78 recorded gene fold upregulation between *A. muciniphila* growth on GlcNAc and purified  
79 mucin O-glycans from PGM III and also the gene fold upregulation in *A. muciniphila* between  
80 a fibre-rich diet and a fibre-free diet in mice<sup>17</sup>. Two data sets used purified PGM III, but with  
81 the O-glycans still attached to the protein (one against glucose and one GlcNAc)<sup>18,19</sup>. The  
82 final two data sets were proteomics of cells grown on PGM III versus glucose grown cells  
83 and the proteomics of the outer-membrane of these cells<sup>20</sup>.

84

## 85 **Genomic context of mucin upregulated GH16 family members**

86 The upregulated GH16 family member from *Bt* is in a PUL with two SusCD pairs, two  
87 predicted SGBPs and a GH from family 18 (Supplementary Fig. 5). The two mucin  
88 upregulated GH16 family members from *B. fragilis* (BF4058<sup>GH16</sup> and BF4060<sup>GH16</sup>) are in a  
89 PUL that included a SusCD pair and two more predicted CAZymes, BF4059 and BF4061,  
90 belonging to the GH20 and GH35 families, respectively. There are three GH16 family  
91 members upregulated on O-glycans from *B. caccae* and two of these (BACCAC\_02679<sup>GH16</sup>  
92 and Baccac\_02680<sup>GH16</sup>) are adjacent to each other and are close homologues to those  
93 found in *B. fragilis*. Baccac\_03717<sup>GH16</sup> is the third mucin upregulated GH16 from *B. caccac*.  
94 All *B. caccae* GH16 family members are in PULs that contain SusCD pairs. In the *A.*  
95 *muciniphila* genome the glycan degrading apparatus is not organised in to PULs and none of  
96 the three GH16 genes upregulated during growth on mucin (Amuc\_0724<sup>GH16</sup>,  
97 Amuc\_0875<sup>GH16</sup> and Amuc2108<sup>GH16</sup>) are near other predicted CAZyme genes<sup>17,18,20</sup>.

98

## 99 **Sequence identity and molecular architecture of the GH16 enzymes**

100 The sequence identity between the mucin upregulated GH16 family members was relatively  
101 low with values of between 24-34 % (Supplementary Table 1). The exceptions to this were  
102 two pairs of *B. fragilis* and *B. caccae* enzymes in homologous PULs: BF4058<sup>GH16</sup> and  
103 BC02679<sup>GH16</sup> and BF4060<sup>GH16</sup> and BC2680<sup>GH16</sup> with 87 and 79 % identity, respectively. All  
104 enzymes were predicted to be composed of a single catalytic module only, with the  
105 exception of BT2824<sup>GH16</sup>, which also possesses an N-terminal module of uncharacterised

106 function (DUF4971; Supplementary Fig. 5). Signal peptide predictions using SignalP 5.0  
107 revealed that most of the *Bacteroides* spp. GH16 family members were predicted to have a  
108 Type II signal peptide (SP), suggesting surface localisation, except for the closely related  
109 BF4060<sup>GH16</sup> and Baccac\_02680<sup>GH16</sup>, which had Type I SP predictions and are thus likely  
110 periplasmic. All three *A. muciniphila* GH16 enzymes are predicted to have a Type I SP,  
111 suggesting they are periplasmic, although intriguingly Amuc\_2108<sup>GH16</sup> also has a C-terminal  
112 hydrophobic region followed by a highly positively charged sequence after this, indicative of  
113 a potential TM anchor. Notably, a previous proteomics study has shown that Amuc\_2108<sup>GH16</sup>  
114 is present in the outer membrane in cells grown on mucin, supporting the TM anchor  
115 prediction<sup>20</sup>. It is possible that SignalP 5.0 is not a very accurate tool for *A. muciniphila*  
116 proteins yet (Supplementary Table 2).

117

### 118 **Growth of human gut bacteria on O-glycan substrates**

119 Human gut *Bacteroides* spp. and *A. muciniphila* were tested for their ability to grow on mucin  
120 as the sole carbon source (Supplementary Fig. 21). Of the 8 *Bacteroides* spp. tested, all  
121 could grow to some extent on PGM types II and III. *A. muciniphila* consistently grew to a  
122 higher OD than the *Bacteroides* spp. indicating that the former can access a greater  
123 proportion of the substrate. Growth of the *Bacteroides* spp. on PGM type III was commonly  
124 biphasic, indicating that the species utilises more than one substrate during a single growth  
125 curve in order of preference. Mucin preparations are likely contaminated with other host  
126 polysaccharides from glycocalyx sources that are difficult to completely remove, including  
127 chondroitin sulfate (CS), heparan sulfate (HS) and hyaluronic acid (HA). Incubation of the  
128 polysaccharide lyases from the *B. thetaiotaomicron* PULs known to degrade these host  
129 glycans<sup>1,2</sup> with both types of PGM show these polysaccharides are present (Supplementary  
130 Fig. 20). However, growth on PGM with a *B. thetaiotaomicron* strain where the PULs  
131 required for the degradation of these other host glycans have been knocked out shows little  
132 difference relative to the wild-type strain. There is slightly less initial growth, but the biphasic  
133 trend remains, suggesting the mucin is responsible for this. Furthermore, some species  
134 show very little growth on CS, HS or HA, but do grow on PGM (e.g. *B. fragilis* and *B.*  
135 *vulgatus*). Showing priority for utilisation of other host glycans over O-glycans has been  
136 observed previously in *B. thetaiotaomicron*<sup>3</sup>.

137

### 138 **Phylogenetic analysis**

139 Phylogenetic analysis was carried out to explore the relationship between these nine mucin  
140 upregulated GH16 family members and those previously characterised (Supplementary Fig.  
141 6). The data show that the newly identified mucin upregulated GH16 family members stem  
142 out of  $\beta$ -glucanase enzymes and not with any of the GH16 family members with activities on

143  $\beta$ -galactans, xyloglucan or chitin $\beta$ 1,6gluconatransferases. There was significant clustering of  
144 the GH16 family members active on O-glycans.

145

146 Further phylogenetic analysis was carried out with GH16 family sequences from a number of  
147 *Bacteroides* spp. alongside the O-glycanase GH16 enzymes described in this report  
148 (Supplementary Fig. 7). In this tree, the O-glycanase enzymes cluster away from GH16  
149 family characterised to have agarase, porphyranase, glucanase and glucosidase activities,  
150 however, they do not all cluster together. This likely represents an example of convergent  
151 evolution in the O-glycanase activity evolving multiple times from different sources. From the  
152 tree, however, the enzymes used by other species to degrade O-glycans can start to be  
153 predicted. Notably, Amuc\_0875<sup>GH16</sup> clusters closely with GH16 sequences characterised as  
154 endo- $\beta$ 1,3-galactosidases shown to degrade arabinogalactan<sup>21</sup> and also has comparable  
155 activity to one of these enzymes on  $\beta$ 1,3-galactan (Supplementary Fig. 16m). This raises the  
156 question of whether Amuc\_0875<sup>GH16</sup> is a true O-glycanase, as it has relatively poor activity,  
157 however, the gene is consistently upregulated in the numerous data sets available and *A.*  
158 *muciniphila* also cannot grow on arabinogalactan<sup>17</sup>. We consider this activity to be  
159 coincidental and it is much more likely that the true target for this enzyme may be a type of O-  
160 glycan structure not able to be tested in the set of assays reported here.

161

162 Interestingly, the genomic contexts of these genes are highly variable in terms of the PUL  
163 structures and adjacent genes. The GH16 family members that might be predicted to be O-  
164 glycanases are often just with a SusCD pair, with proteases or orphan genes  
165 (Supplementary Fig. 5). Furthermore, there are other GH16 enzymes in *B. thetaiotaomicron*,  
166 *B. fragilis* and *B. caccae* that have quite high sequence homology to the O-glycanases that  
167 are not upregulated with growth on O-glycans. This could be due to them being obsolete or  
168 alternatively they could have a different substrate. GH16 family members from pathogenic  
169 bacteria also from the Bacteroidetes phylum were included also in the analysis and they  
170 cluster quite well with the O-glycan active GH16 enzymes found in mutualists. A GH16 from  
171 *Tannerella forsythia* clusters well with BACCAC\_03717<sup>GH16</sup>, for example (Supplementary  
172 Fig. 7).

173

#### 174 **Assays against classic GH16 substrates**

175 Recombinant forms of these GH16 family members were tested for activity against a range  
176 of  $\beta$ -glucan and  $\beta$ -galactan polysaccharides that have previously been shown to be  
177 substrates for GH16 family members. The data revealed little activity for most of the  
178 enzymes, except Amuc\_0724<sup>GH16</sup>, which displayed endo-like activity against marine  
179 laminarin and weak activity against barley  $\beta$ -glucan and lichenan (Supplementary Fig. 16).

180 The reason for this is discussed in the Main and Supplementary Discussions on the  
181 structures of these enzymes. BF4060<sup>GH16</sup>, Baccac\_02680<sup>GH16</sup> and Baccac\_03717<sup>GH16</sup> also  
182 displayed some very weak activity against laminarin, but not any of the other plant  
183 polysaccharides tested. We also tested other host polysaccharides that are likely usually  
184 present in the gut in the mucus layer, including CS, HS and HA. No products were observed  
185 for CS and HA by TLC, but for HS there was a single product observed for BT2824<sup>GH16</sup>,  
186 BF4060<sup>GH16</sup>, Baccac\_03717<sup>GH16</sup>, Amuc\_0724<sup>GH16</sup> and Amuc\_2108<sup>GH16</sup>, and two different  
187 products for Amuc\_0875<sup>GH16</sup>. The linker between heparan sulfate polysaccharides and  
188 protein is GlcA $\beta$ 1,3Gal $\beta$ 1,3Gal $\beta$ 1,4Xyl, which has a potential GH16 cut site. We explored the  
189 potential for the O-glycan active enzymes to cleave this linker, but no activity was observed  
190 against human syndecan (Supplementary Fig. 16q).

191

### 192 **Substrate specificity of the GH16 family members**

193 A variety of defined O-glycan and human milk-derived oligosaccharides were used to assess  
194 the specificity of the GH16 substrates further (Supplementary Figs. 12-15 and  
195 Supplementary Table 4). These data indicate that the enzymes are endo  $\beta$ 1,4-  
196 galactosidases with a requirement for a  $\beta$ 1,3-linked sugar at the -2 position. Notably, none of  
197 the GH16 enzymes require sulfation or fucosylation decorations for activity. The  
198 Amuc\_0875<sup>GH16</sup> enzyme could not completely degrade TriLacNAc overnight. Most of the  
199 GH16 enzymes hydrolysed the TriLacNAc rapidly under the conditions tested  
200 (Supplementary Fig. 13), however, BF4058<sup>GH16</sup> and Baccac\_02679<sup>GH16</sup> displayed  
201 significantly lower activity against the hexasaccharide and degradation of triLacNAc by  
202 Amuc\_0875<sup>GH16</sup> was only detectable after overnight incubation.

203

204 All enzymes, bar Amuc\_0875<sup>GH16</sup>, could also degrade Lacto-N-neotetraose (LNnT) and  
205 Lacto-N-tetraose (LNT) overnight, suggesting plasticity in the positive subsites of these  
206 GH16 family members (Supplementary Fig. 14). However, substrate depletion assays  
207 indicate differences between the GH16 enzymes in terms of the importance of these  
208 subsites for activity (Supplementary Fig. 13). The activity against LNnT and LNT is  
209 comparable to TriLacNAc in the case of Baccac\_03717, for example, but is much lower for  
210 BF4060<sup>GH16</sup>. BT2824<sup>GH16</sup>, Baccac\_02680<sup>GH16</sup>, Amuc\_0724<sup>GH16</sup> and Amuc\_2108<sup>GH16</sup>, but not  
211 dramatic. Furthermore, three of the enzymes showed preferences between the two milk  
212 oligosaccharides. Baccac\_02680<sup>GH16</sup> degrades LNT preferentially, whereas BT2824 and  
213 Amuc0724 prefer LNnT. This may indicate a difference in preference for a  $\beta$ 1,3 and a  $\beta$ 1,4  
214 linkages between the -2 and -3 subsites. Interestingly, when these GH16 family members  
215 were tested against a form of LNT where the GlcNAc is replaced with a GalNAc no activity  
216 was detected apart from trace activity for Amuc\_0875<sup>GH16</sup>. The difference between these

217 sugars is the position of the hydroxyl at C4 being equatorial and axial in GlcNAc and  
218 GalNAc, respectively. An axial bond at this position means the  $\beta$ 1,4-linked Gal at this  
219 position would be at an angle relative to the rest of the oligosaccharide and no longer  
220 forming a linear chain. The lack of activity suggests that the axial hydroxyl in a GalNAc  
221 would generate a significant steric clash with the protein enough for it not to be  
222 accommodated. Sensitivity to the sugar in the -2 subsite has been documented  
223 previously<sup>22,23</sup>. There is also evidence to suggest that a sugar in the -2 subsite is required for  
224 activity for most of the GH16 enzymes tested here. For example, the Gal $\beta$ 1,4GlcNAc $\beta$ 1,4Gal  
225 product that remains after TriLacNAc and LNNt degradation is not further degraded,  
226 although BT2824<sup>GH16</sup> and Baccac\_03717<sup>GH16</sup> do appear to have trace activity against this  
227 (Supplementary Fig. 14).

228

229 Activity against blood group hexasaccharides type II was then used to probe the flexibility  
230 the enzymes have in the negative subsites (Supplementary Fig. 13 & 14). These glycans  
231 have a LNNt core with an  $\alpha$ 1,2-fucose and a  $\alpha$ 1,3-GalNAc or galactose (blood group A and  
232 B, respectively) on the galactose at the non-reducing end. Again different enzymes showed  
233 different preferences, but the activity of most of the enzymes were affected by these  
234 decorations relative to LNNt, with Amuc\_0724<sup>GH16</sup> being the exception. Only BT2824<sup>GH16</sup>  
235 seemed to show a preference for the hydrolysis of blood group B over A. Blood group H was  
236 also tested to look at the effect of the  $\alpha$ 1,3-GalNAc or galactose on activity. BF4060<sup>GH16</sup>,  
237 Baccac\_02680<sup>GH16</sup>, Baccac\_03717<sup>GH16</sup> and Amuc0725 showed an increase in activity with  
238 blood group H relative to A and B, suggesting the  $\alpha$ 1,3 decorations are not well  
239 accommodated by these enzymes. In contrast, BT2824<sup>GH16</sup>, BF4058<sup>GH16</sup> and  
240 Amuc\_2108<sup>GH16</sup> activities were unaffected with the removal of the  $\alpha$ 1,3-GalNAc or galactose,  
241 which suggests that the  $\alpha$ 1,2-fucose is predominantly causing the reduced activity relative to  
242 LNNt. During prolonged incubation most of the enzymes had some activity against the blood  
243 group milk oligosaccharides and, furthermore, the products from porcine small intestinal  
244 mucin included those where the  $\alpha$ 1,3-GalNAc would be in the -4 position plus a variety of  
245 fucose and sulfate decoration (Fig. 2b, *glycans 9, 11, 13 and 16*).

246

247 All nine GH16 family members were tested against a series of disaccharides, but no activity  
248 could be observed (Supplementary Fig. 15). This is to be expected with endo-acting  
249 enzymes, as more than two subsites to be occupied to provide the binding energy for  
250 catalysis. Activity was possible for most enzymes against Lacto-N-triose, reiterating the  
251 requirement for a sugar in the -2 position (Supplementary Fig. 15g). A number substrates  
252 were tested that had an  $\alpha$ -linked sugar at this position, but no activity was seen

253 (Supplementary Fig. 15). This is most likely due to the  $\alpha$ -linkage causing a more kinked  
254 chain that cannot be accommodated by the enzyme similar to when a GalNAc is in the -2.  
255

### 256 **Reports of O-glycan degradation by members of the GH16 family**

257 Although most of the GH16 family members have been characterised to have activity against  
258 terrestrial or marine plant polysaccharides, there have been two previous reports of GH16  
259 enzymes with activity against host glycans. One of these was the activity of a GH16 family  
260 member from *Sphingobacterium multivorum* against keratan sulfate<sup>24,25</sup>. This is usually an  
261 environmental bacterial species, but can cause human infections, usually in  
262 immunocompromised patients<sup>26</sup>. Phylogenetic analysis of this GH16 shows the *S.*  
263 *multivorum* sequence clusters with the *Bacteroides* spp. sequences investigated in this study  
264 (Supplemental Fig. 6). This enzyme was determined to hydrolyse the Gal $\beta$ 1,4GlcNAc bond  
265 to release predominantly 6-O-sulfo-GlcNAc $\beta$ 1,3Gal and GlcNAc $\beta$ 1,3Gal products from a  
266 variety of keratan sulfate sources. Interestingly, the *S. multivorum* enzyme was found to also  
267 cleave milk oligosaccharides capped with sialic acid, which is different from what we observe  
268 in the O-glycan GH16 enzymes characterised here.

269

270 The second example of a GH16 with activity against O-glycans is from *Clostridium*  
271 *perfringens* and capable of removing the GlcNAc $\alpha$ 1,4Gal disaccharide at the non-reducing  
272 end of the O-glycan<sup>27,28</sup>, which is an epitope associated only with stomach mucin<sup>29,30</sup>. The  
273 crystal structure revealed a unique binding site to other GH16 family members with a pocket  
274 in the negative subsite area tailored to fit the disaccharide substrate<sup>31</sup> (Supplementary Fig.  
275 18b).

276

### 277 **Keratanases**

278 Keratan sulfate chains are anchored to the protein through N-linkages, O-linkages and O-  
279 mannosylation are termed KS-I, KS-II and KS-III, respectively<sup>32</sup>(Supplementary Fig. 4).  
280 Examples of areas of the body enriched in KS-I, KS-II and KS-III include the cornea, skeletal  
281 and brain, respectively. There are three classes of enzymes that have endo-activity against  
282 keratan - the  $\beta$ -galactosidases described above and keratanases type I and II. Type I  
283 enzymes are also  $\beta$ -galactosidases, but require sulfation for activity and cannot hydrolyse  
284 unsulfated glycans<sup>25</sup>. Type II enzymes are endo- $\beta$ -N-acetylglucosaminidases, so hydrolyse a  
285 different linkage, and releases disaccharides and tetrasaccharides with varying amounts of  
286 sulfation and also tolerate fucose<sup>33,34</sup>. There have been other reports of endo- $\beta$ -  
287 galactosidases active on keratan sulfate and milk oligosaccharides from *Citrobacter freundii*,  
288 *Coccobacillus* spp. and *B. fragilis*, but insufficient information in the literature prevents us  
289 from confirming if these are from the GH16 family<sup>25,35-37</sup>.



290

291 The GH16 enzymes reported here produced products from egg and bovine corneal keratan  
292 sulfate visible by TLC and were analysed in the same way as O-glycan products with  
293 procainamide labelling and LC-FLD-ESI-MS (Supplementary Fig. 11). The results indicate  
294 some sulfate groups can be tolerated by the GH16 family members, but heavily sulfated O-  
295 glycan fragments could not be degraded further (for example, *glycans 13-15*). This activity is  
296 distinct from Keratanase type I and II activities.

297

## 298 **Further discussion on the crystal structures of the O-glycan active GH16 family** 299 **members**

300

### 301 *The characteristics of the ligand in complexed O-glycan active GH16 structures*

302 The non-reducing end Gal and GlcNAc modelled in the most stable <sup>4</sup>C<sub>1</sub> chair conformation,  
303 whereas the reducing end Gal, occupying the -1 subsite, presented a <sup>1</sup>S<sub>3</sub> skew boat  
304 conformation. The occurrence of a less stable conformation at this position has been  
305 described previously as a structural adaptation during hydrolysis in a GH16 1,3-1,4-β-  
306 glucanase<sup>38</sup>. The resolution of the ligand in the BF4060<sup>GH16</sup> structure was insufficient to  
307 define the conformation of the monosaccharides, so the ligand was modelled based on the  
308 trisaccharide from the Baccac\_02680<sup>GH16E143Q</sup> structure.

309

### 310 *Accommodation of a glucose or galactose at the -1 subsite*

311 At the -1 subsite, the selection of glucose or galactose is very significant as the C4 points in  
312 towards the binding cleft. Analysis of the different GH16 structures available, however,  
313 reveals no strict rule for how space is created for the equatorial glucose hydroxyl or  
314 tightened up for the axial galactose hydroxyl. However, the residues on finger 1 always play  
315 a key role in controlling this space. In the *Bacteroides* structures described in this study, a  
316 tryptophan from finger 1 blocks off the possibility of an equatorial positioning in this area to  
317 produce a galactose-tailored pocket (Fig. 3b and Supplementary Fig. 19a). In contrast, a  
318 surface representation of the Amuc\_0724<sup>GH16</sup> structure shows a relatively open space  
319 around the C4 and C6 formed by finger 1 being further away, with an arginine replacing the  
320 tryptophan and relatively small residues lining the β-strands in this area (Supplementary Fig.  
321 19a). This is a possible structural explanation for the activity of this enzyme towards glucose  
322 polymers.

323

324 A closer look at this region in Amuc\_0724<sup>GH16</sup> structure, shows that this open space is  
325 actually a short tunnel and possibly accommodates decoration of the galactose (Fig. 2c).  
326 Pockets and tunnels above the -1 subsite have previously been observed in a number of

327 GH16 structures, for example, the ZgLamC<sub>GH16-E142S</sub> structure from *Zobellia galactanivorans*  
328 (Supplementary Fig. 19b). This enzyme is active on laminarin (predominantly  $\beta$ 1,3-glucan  
329 with occasional  $\beta$ 1,6-branching), but also mixed-linked glucan. It was crystallised with a  
330 glycerol inside the -1 subsite pocket and it was suggested that it may be able to  
331 accommodate a branching  $\beta$ 1,6 monosaccharide<sup>39</sup>. To test this idea out for the O-glycan  
332 active GH16 family members, especially Amuc\_0724<sup>GH16</sup>, we took lacto-N-hexaose and  
333 enzymatically removed the capping galactose to leave a lactose with two GlcNAc linked to  
334 the galactose through  $\beta$ 1,3 and  $\beta$ 1,6 bonds. Most of the enzymes were active on the same  
335 structure with just the  $\beta$ 1,3-linked GlcNAc (Supplementary Fig. 15g), however, no significant  
336 activity could be seen against the branched substrate. This pocket, therefore, most likely  
337 cannot accommodate a  $\beta$ 1,6-GlcNAc branch.

338

339 GH16 family members that have to accommodate galactose at this position include the  
340 agarases, porphyranases and pectic galactanases. In the agarase structures currently  
341 available that are complexed with substrate or product, a glutamic acid from the  $\beta$ -sheet of  
342 the cleft coordinates with and fills the space around the C4 hydroxyl. A proline from finger 1  
343 sits adjacent to this (Supplementary Fig. 18c)<sup>40</sup>. In the porphyranase structures, there is a  
344 glutamic acid in approximately the same position, but an arginine from finger 1 also  
345 coordinates with C4 and fills this space (Supplementary Fig. 18c)<sup>22</sup>. From these observations  
346 about the -1 subsite in all GH16 structures, we can conclude that selection of glucose or  
347 galactose at the -1 position is achieved in multiple ways by GH16 family members. There are  
348 currently no pectic  $\beta$ 1,4-galactanase structures to allow comparison.

349

#### 350 *Specificity for a 1,3-linkage between the -1 and -2 sugars*

351 The linkage between the monosaccharides in the -1 and -2 subsites is a 1,3 for some GH16  
352 family members, but this is not the case for xyloglucan hydrolases, xyloglucan endo  
353 transferases, pectic galactosidases and chitin $\beta$ 1,6gluconatransferases. This specificity is  
354 commonly selected for in  $\beta$ -glucanases through the geometry of the two hydrophobic  
355 platforms that the monosaccharides at these positions sit on, which are at 90 ° relative to  
356 each other<sup>41</sup>. In the structures available for  $\beta$ -glucan-active enzymes, where a glucose would  
357 be in the -2 position, an aromatic residue from finger 3 or the local  $\beta$ -strand acts as a  
358 platform for the  $\alpha$ -face of this sugar to stack parallel to. The endo-mucinase GH16 structures  
359 presented in this study also have this aromatic platform, so are most comparable to  
360 glucanases in this respect (Fig. 3b). This structural observation corresponds with the  
361 biochemical characterisation of the O-glycan active GH16 family members described above  
362 as requiring a  $\beta$ 1,3-linked GlcNAc in the -2 subsite for activity.

363

364 Interactions with the  $\beta$ -face of this sugar is usually through residues coming from finger 1  
365 and from the  $\beta$ -sheet in the cleft, but these are variable even within enzymes with the same  
366 activities. The structures available for the enzymes degrading marine polysaccharides have  
367 to deal with an alpha linkage at the -2 position, an anhydrogalactose in the case of agarases  
368 and carrageenases, and sulfation at C6 for porphyranases. This does not involve aromatic  
369 stacking but coordination through polar interactions and non-parallel  $\pi$ -stacking with  
370 aromatic residues (Supplementary Fig. 18c).

371

372 The N-acetyl coming off the C2 of the GlcNAc for the O-glycanases points out into solution  
373 away from the cleft, so accommodating this in a specific cleft pocket is not an issue for the  
374 enzymes reported here. The cleft of the GH16 does have to be fairly open to allow the N-  
375 acetyl and would be too bulky for GH16 enzymes with more closed clefts, so this is likely one  
376 criterion for O-glycan active GH16 enzymes. The C6 of the GlcNAc in the -2 subsite of the  
377 O-glycanases is bonded to a methionine in Baccac\_02680<sup>GH16</sup> and BF4060<sup>GH16</sup> and likely a  
378 leucine in Amuc0724<sup>GH16</sup> and Baccac\_03717<sup>GH16</sup> (Fig. 3b and Supplementary Fig. 19a).

379

380 In addition to  $\beta$ -glucanases, those GH16 family members accommodating glucose-type  
381 sugars at the -1 include the xyloglucan hydrolases, xyloglucan endo transferases and  
382 chitin $\beta$ 1,6gluconatransferases. These are repeating  $\beta$ 1,4-linkages, so require an open  
383 structure around the C4 allowed by the absence of a Finger 1. These enzymes also  
384 therefore do not have the characteristic of a 1,3 linkage between the -1 and -2 subsites.  
385 Structures of the xyloglucan active enzymes show a significantly different cleft to  
386 accommodate the  $\beta$ 1,4-linkages (Supplementary Fig. 18a). There are currently no structures  
387 available of chitin $\beta$ 1,6gluconatransferases for comparison.

388

### 389 *The -3 subsite and beyond*

390 The area around the -3 subsite galactose is fairly open in the Baccac\_02680<sup>GH16E143Q</sup> and  
391 BF4060<sup>GH16</sup> structures and the same is true when the product is overlaid into  
392 Baccac\_03717<sup>GH16</sup>. The extended Finger 2 in the Amuc0724<sup>GH16</sup> structure, however, could  
393 theoretically interact with a longer substrate. An extensive loop structure reaching down to  
394 the binding cleft has been seen before in other GH16 structures, such as the  $\kappa$ -  
395 Carrageenases from *Zobellia galactanivorans* and *Pseudoalteromonas carrageenovora*  
396 (Supplementary Fig. 18d), which possess a similar Finger 2 and it interacts with the -4 sugar  
397 in the case of the *P. carrageenovora* structure<sup>42</sup>.

398

399 In the O-glycan structures presented here, there is space at the -3 for a  $\beta$ 1,4-linked  
400 galactose, but it is easy to see that if the sugar in the -3 did not continue the chain in a linear

401 fashion then that may not be accommodated. We were able to see this when we tested for  
402 activity of the nine O-glycan active GH16 enzymes against Gal $\beta$ 1,4GalNAc $\beta$ 1,3Gal $\beta$ 1,4Glc  
403 and saw negative results, except in the case of Amuc\_0875<sup>GH16</sup> that had trace activity. The  
404 axial position of the hydroxyl at C4 in a GalNAc would mean the galactose in the -3 would  
405 now be kinked, therefore showing specificity for a GlcNAc at the -2 position. Agarases,  
406 carrageenases and porphyranases (galactans) have fairly linear glycans due to alpha bonds  
407 when a 1,3-linkage is used, which alternates with the  $\beta$ 1,4 linkage (Fig. 3e).

408

#### 409 *The positive subsites*

410 The positive subsites of retaining GH enzyme structures are rarely occupied with product  
411 due to the low binding affinity of the positive subsites to facilitate rapid leaving of the product  
412 after the initial glycosylation step<sup>43,44</sup>. However, structures of a GH16 from *Phanerochaete*  
413 *chrysosporium* with different glucan products bound allow us to hypothesise about how the  
414 positive subsite sugars would be accommodated in the O-glycan-active GH16 enzymes.  
415 Orientation of the glucose in the +1 subsite of three structures (PDB codes 2W52, 2WLQ  
416 and 2WN) has the  $\beta$ -face fronting a tryptophan from finger 6. The O-glycan active enzymes  
417 have an aromatic that overlays well with this tryptophan. Analysis of the positive subsites of  
418 GH16 structures show that the majority of them have an aromatic in this area and it could  
419 straddle both the +1 and +2 subsites or just one depending on the structure in question.  
420 Aromatic residues are sometimes not present in the +1 subsite of GH16 enzymes active on  
421 marine polysaccharides. The position of the +1 sugar in the *P. chrysosporium* GH16  
422 suggests the hydrolysis of a  $\beta$ 1,3 bond. For the O-glycan active GH16 enzymes, however,  
423 this would be a  $\beta$ 1,4 bond and rotation of the sugar to reflect this would place the C6  
424 pointing into the cleft of the enzyme. Overlay of the +1 glucose from 2WLQ indicate that this  
425 would be spatially difficult to accommodate, but it is possible the sugar sits slightly further  
426 away from the cleft than seen in glucanases (Fig. 3d).

427

428 The importance of the positive subsite residues was analysed by comparing the rates  
429 against triLacNAc versus milk oligosaccharides LNnT and LNT (Supplementary Fig. 13). The  
430 activity of BF4060<sup>GH16</sup> on the milk oligosaccharides was significantly decreased compared to  
431 triLacNAc, but this was not the case for Baccac\_03717<sup>GH16</sup>. The structures of  
432 Baccac\_03717<sup>GH16</sup> is much more open at this position, whereas BF4060<sup>GH16</sup> has a much  
433 more closed slot for the +1 sugar to sit in and a serine (S174) coming from Finger 5 could  
434 potentially interact with the N-acetyl and pincher it against Finger 6 (Fig. 3d). Therefore,  
435 BF4060<sup>GH16</sup> could be showing specificity for GlcNAc in the +1, but it is also possible that the  
436 enzymes are sensitive to the number of positive subsites that are filled.

437

438 For the Amuc\_0724<sup>GH16</sup> structure, the tryptophan at this position (W279) had dual occupancy  
439 so could be modelled to sit in the cleft or flipped out of this position away from the cleft. The  
440 flipped out position of the tyrosines from the two molecules in the unit cell may be an artefact  
441 of crystallographic dimer rather than biologically relevant (Supplementary Fig. 19c). A  
442 dynamic tyrosine has also been seen in the positive subsites of a GH16 from *B. ovatus* with  
443  $\beta$ -glucanase activity<sup>45</sup> (Supplementary Fig. 17d).

444

445 *Accommodating sulfate, fucose and blood group decorations along the polyLacNAc chain by*  
446 *O-glycan active GH16 family members*

447 O-glycans can have 3S (capping) and 6S sulfation on galactose and 6S also on GlcNAc.  
448 Overlay of the product from the 5OCQ  $\kappa$ -carrageenases from *Pseudoalteromonas*  
449 *carrageenovora* with the Amuc\_0725<sup>GH16</sup> structure shows how the tunnel structure in the -1  
450 subsite could accommodate a sulfate group on the Gal at 6S, however this is most likely not  
451 a possibility for the *Bacteroides* spp. structures (Supplementary Fig. 19e)<sup>42</sup>. Overlay of 3ILF  
452 porphyranase from

453 *Zobellia galactanivorans* with the O-glycan active GH16 structures mimics a 6S sulfation of  
454 the GlcNAc in the -2 subsite and all enzymes show potential in accommodating this  
455 decoration (Supplementary Fig. 19f)<sup>22</sup>. At the -3 subsite, C6 of the galactose points into  
456 solution, so could possibly accommodate sulfate here also.

457

458 Fucose can be linked through  $\alpha$ 1,2/3/4 bonds in O-glycans. It is most likely not possible for a  
459 Gal to be in the -1 position if there is a fucose attached. However, C3 of the GlcNAc in the -2  
460 position looks open to fucose decoration at this position as the clefts have a fairly open  
461 structure. We characterised if the nine O-glycan active enzymes could accommodate blood  
462 group sugars appended to the -3 Gal. The  $\alpha$ 1,2-linked fucose would point into the cleft and  
463 the  $\alpha$ 1,3-linked GalNAc or Gal would be at approximately 90° to the rest of the linear  
464 substrate. As a general trend, the blood group sugars reduce activity of the O-glycan active  
465 GH16 enzymes and the removal of the  $\alpha$ 1,3-linked GalNAc or Gal attenuates this effect  
466 (Supplementary Fig. 13). There does look like there are pockets for a  $\alpha$ 1,2-linked fucose in  
467 the -3' position in the crystal structures presented in this study.

468

469 *Minimum substrate requirements*

470 For all the structures, there are three well-defined subsites from -2 to +1 with some possible  
471 interactions at the -3 and +2 positions. In contrast, it is not unusual for other GH16 family  
472 members to have longer binding clefts, which generates a more specific substrate specificity  
473 and requirement for the subsites to be filled for catalytic activity, for example AgaD, which  
474 requires a minimum product size of DP8<sup>46</sup>. The relatively small number of defined subsites in

475 the O-glycan active GH16 family members described in this study and their minimum  
476 substrate length being DP3 likely reflects the variable nature of O-glycan as a substrate,  
477 particularly in terms of the sulfate and fucose decoration.

478

#### 479 **Activities of the two other CAZymes from the *B. fragilis* PUL**

480 There are two genes predicted to be from other CAZy families in the *B. fragilis* PUL where  
481 the O-glycan active GH16 genes are encoded. They are from families GH20 and GH35 and  
482 both predicted to have SPI type signal peptides (Supplementary Table 2). Recombinant  
483 versions of these enzymes were expressed as described for the GH16 enzymes in this  
484 report and tested against a variety of defined oligosaccharides to determine specificity  
485 (Supplementary Fig. 10 and 22).

486

487 BF4061<sup>GH35</sup> was found to be active against LacNAc, Lacto-N-biose and Gal $\beta$ 1,3Glu, partially  
488 active against lactose and inactive against Gal $\beta$ 1,4Gal. This indicates a preference for  
489 GlcNAc>Glc>Gal in the +1 position, thus a specificity for mucin-type oligosaccharides over  
490 milk and plant-type saccharides (Supplementary Fig 10). There was no activity found against  
491 fucosylated versions of these oligosaccharides, indicating that fucose needs to be removed  
492 prior to this enzyme carrying out its function. This has been seen previously for host glycans,  
493 where fucose needed to be removed from the antenna of complex N-glycans from human  
494 IgA colostrum before the galactosidase (BT0461<sup>GH2</sup>) could act<sup>47</sup>. This galactosidase comes  
495 from a different CAZy family, which illustrates how different bacteria evolve different ways of  
496 dealing with similar substrates. Interestingly, BF4061<sup>GH35</sup> described here can accommodate  
497 both  $\beta$ 1,3 and  $\beta$ 1,4-linkages, whereas BT0461<sup>GH2</sup> can only accommodate  $\beta$ 1,4-linkages and  
498 these specificities represent the linkages present in their respective substrates. BF4061<sup>GH35</sup>  
499 can also remove  $\beta$ 1,3-galactose when there is a GalNAc in the +1 subsite and both capping  
500 galactose from lacto-N-hexaose, where these substrates represent O-glycan core and  
501 branched structures, respectively (Supplementary Fig. 10).

502

503 The second CAZyme, BF4059<sup>GH20</sup>, was very broad acting in accommodating a variety of  
504 linkages and monosaccharides in the +1 position (Supplementary Fig 22).

505 Chitooligosacchrides of a degree of polymerisation between 2 and 5 could be degraded to  
506 GlcNAc and non-reducing end GlcNAc could be removed from O-glycan-type structures  
507 (GlcNAc  $\beta$ 1,3Gal, Lacto-N-triose and Lacto-N-hexaose). BF4059<sup>GH20</sup> can also degrade  
508 GalNAc $\beta$ 1,3Gal, but not GalNAc $\beta$ 1,3Gal $\beta$ 1,4Glu. N-glycan type structure GlcNAc $\beta$ 1,2Man  
509 could also be degraded, reflecting the broad activity of this enzyme.

510

511 The predicted localisation of these enzymes and their specificities most likely places them in  
512 the periplasm of *B. fragilis* acting on the GH16 products that have been imported into the  
513 cell. The action of these enzymes plus fucosidases and sulfatases would allow degradation  
514 of the GH16 products down to monosaccharides.

- 515 1 Cartmell, A. *et al.* How members of the human gut microbiota overcome the sulfation  
516 problem posed by glycosaminoglycans. *Proceedings of the National Academy of Sciences of*  
517 *the United States of America* **114**, 7037-7042, doi:10.1073/pnas.1704367114 (2017).
- 518 2 Ndeh, D. *et al.* The human gut microbe *Bacteroides thetaiotaomicron* encodes the founding  
519 member of a novel glycosaminoglycan-degrading polysaccharide lyase family PL29. *The*  
520 *Journal of biological chemistry* **293**, 17906-17916, doi:10.1074/jbc.RA118.004510 (2018).
- 521 3 Martens, E. C., Chiang, H. C. & Gordon, J. I. Mucosal glycan foraging enhances fitness and  
522 transmission of a saccharolytic human gut bacterial symbiont. *Cell host & microbe* **4**, 447-  
523 457, doi:10.1016/j.chom.2008.09.007 (2008).
- 524 4 Johansson, M. E. *et al.* The inner of the two Muc2 mucin-dependent mucus layers in colon is  
525 devoid of bacteria. *Proceedings of the National Academy of Sciences of the United States of*  
526 *America* **105**, 15064-15069, doi:10.1073/pnas.0803124105 (2008).
- 527 5 Ambort, D. *et al.* Calcium and pH-dependent packing and release of the gel-forming MUC2  
528 mucin. *Proceedings of the National Academy of Sciences of the United States of America* **109**,  
529 5645-5650, doi:10.1073/pnas.1120269109 (2012).
- 530 6 Johansson, M. E. Fast renewal of the distal colonic mucus layers by the surface goblet cells as  
531 measured by in vivo labeling of mucin glycoproteins. *PLoS one* **7**, e41009,  
532 doi:10.1371/journal.pone.0041009 (2012).
- 533 7 Johansson, M. E. *et al.* Normalization of Host Intestinal Mucus Layers Requires Long-Term  
534 Microbial Colonization. *Cell host & microbe* **18**, 582-592, doi:10.1016/j.chom.2015.10.007  
535 (2015).
- 536 8 Hansson, G. C. Mucus and mucins in diseases of the intestinal and respiratory tracts. *J Intern*  
537 *Med*, doi:10.1111/joim.12910 (2019).
- 538 9 Larsson, J. M., Karlsson, H., Sjovall, H. & Hansson, G. C. A complex, but uniform O-  
539 glycosylation of the human MUC2 mucin from colonic biopsies analyzed by nanoLC/MSn.  
540 *Glycobiology* **19**, 756-766, doi:10.1093/glycob/cwp048 (2009).
- 541 10 Andersch-Bjorkman, Y., Thomsson, K. A., Holmen Larsson, J. M., Ekerhovd, E. & Hansson, G.  
542 C. Large scale identification of proteins, mucins, and their O-glycosylation in the endocervical  
543 mucus during the menstrual cycle. *Molecular & cellular proteomics : MCP* **6**, 708-716,  
544 doi:10.1074/mcp.M600439-MCP200 (2007).
- 545 11 Thomsson, K. A., Schulz, B. L., Packer, N. H. & Karlsson, N. G. MUC5B glycosylation in human  
546 saliva reflects blood group and secretor status. *Glycobiology* **15**, 791-804,  
547 doi:10.1093/glycob/cwi059 (2005).



- 548 12 Schulz, B. L. *et al.* Mucin glycosylation changes in cystic fibrosis lung disease are not manifest  
549 in submucosal gland secretions. *The Biochemical journal* **387**, 911-919,  
550 doi:10.1042/bj20041641 (2005).
- 551 13 Fujita, M. *et al.* Glycoside hydrolase family 89 alpha-N-acetylglucosaminidase from  
552 *Clostridium perfringens* specifically acts on GlcNAc alpha1,4Gal beta1R at the non-reducing  
553 terminus of O-glycans in gastric mucin. *The Journal of biological chemistry* **286**, 6479-6489,  
554 doi:10.1074/jbc.M110.206722 (2011).
- 555 14 Nordman, H. *et al.* Gastric MUC5AC and MUC6 are large oligomeric mucins that differ in size,  
556 glycosylation and tissue distribution. *The Biochemical journal* **364**, 191-200,  
557 doi:10.1042/bj3640191 (2002).
- 558 15 Jin, C. *et al.* Structural Diversity of Human Gastric Mucin Glycans. *Molecular & cellular*  
559 *proteomics : MCP* **16**, 743-758, doi:10.1074/mcp.M116.067983 (2017).
- 560 16 Pudlo, N. A. *et al.* Symbiotic Human Gut Bacteria with Variable Metabolic Priorities for Host  
561 Mucosal Glycans. *MBio* **6**, e01282-01215, doi:10.1128/mBio.01282-15 (2015).
- 562 17 Desai, M. S. *et al.* A Dietary Fiber-Deprived Gut Microbiota Degrades the Colonic Mucus  
563 Barrier and Enhances Pathogen Susceptibility. *Cell* **167**, 1339-1353.e1321,  
564 doi:10.1016/j.cell.2016.10.043 (2016).
- 565 18 Ottman, N. *et al.* Genome-Scale Model and Omics Analysis of Metabolic Capacities of  
566 *Akkermansia muciniphila* Reveal a Preferential Mucin-Degrading Lifestyle. *Applied and*  
567 *environmental microbiology* **83**, doi:10.1128/aem.01014-17 (2017).
- 568 19 Shin, J. *et al.* Elucidation of *Akkermansia muciniphila* Probiotic Traits Driven by Mucin  
569 Depletion. *Frontiers in microbiology* **10**, 1137, doi:10.3389/fmicb.2019.01137 (2019).
- 570 20 Ottman, N. *et al.* Characterization of Outer Membrane Proteome of *Akkermansia*  
571 *muciniphila* Reveals Sets of Novel Proteins Exposed to the Human Intestine. *Frontiers in*  
572 *microbiology* **7**, 1157, doi:10.3389/fmicb.2016.01157 (2016).
- 573 21 Cartmell, A. *et al.* A surface endogalactanase in *Bacteroides thetaiotaomicron* confers  
574 keystone status for arabinogalactan degradation. *Nature microbiology* **3**, 1314-1326,  
575 doi:10.1038/s41564-018-0258-8 (2018).
- 576 22 Hehemann, J. H. *et al.* Transfer of carbohydrate-active enzymes from marine bacteria to  
577 Japanese gut microbiota. *Nature* **464**, 908-912, doi:10.1038/nature08937 (2010).
- 578 23 Hehemann, J. H., Kelly, A. G., Pudlo, N. A., Martens, E. C. & Boraston, A. B. Bacteria of the  
579 human gut microbiome catabolize red seaweed glycans with carbohydrate-active enzyme  
580 updates from extrinsic microbes. *Proceedings of the National Academy of Sciences of the*  
581 *United States of America* **109**, 19786-19791, doi:10.1073/pnas.1211002109 (2012).

- 582 24 Kitamikado, M., Ito, M. & Li, Y. T. Isolation and characterization of a keratan sulfate-  
583 degrading endo-beta-galactosidase from *Flavobacterium keratolyticus*. *The Journal of*  
584 *biological chemistry* **256**, 3906-3909 (1981).
- 585 25 Ito, M., Hirabayashi, Y. & Yamagata, T. Substrate specificity of endo-beta-galactosidases  
586 from *Flavobacterium keratolyticus* and *Escherichia freundii* is different from that of  
587 *Pseudomonas* sp. *Journal of biochemistry* **100**, 773-780,  
588 doi:10.1093/oxfordjournals.jbchem.a121770 (1986).
- 589 26 Abro, A. H., Rahimi Shahmirzadi, M. R., Jasim, L. M., Badreddine, S. & Al Deesi, Z.  
590 *Sphingobacterium multivorum* Bacteremia and Acute Meningitis in an Immunocompetent  
591 Adult Patient: A Case Report. *Iranian Red Crescent medical journal* **18**, e38750,  
592 doi:10.5812/ircmj.38750 (2016).
- 593 27 Ashida, H. *et al.* A novel endo-beta-galactosidase from *Clostridium perfringens* that liberates  
594 the disaccharide GlcNAc $\alpha$ 1 $\rightarrow$ Gal from glycans specifically expressed in the gastric gland  
595 mucous cell-type mucin. *The Journal of biological chemistry* **276**, 28226-28232,  
596 doi:10.1074/jbc.M103589200 (2001).
- 597 28 Ashida, H., Maskos, K., Li, S. C. & Li, Y. T. Characterization of a novel endo-beta-galactosidase  
598 specific for releasing the disaccharide GlcNAc  $\alpha$ 1 $\rightarrow$ 4Gal from glycoconjugates.  
599 *Biochemistry* **41**, 2388-2395, doi:10.1021/bi011940e (2002).
- 600 29 Nakayama, J. *et al.* Expression cloning of a human  $\alpha$ 1, 4-N-acetylglucosaminyltransferase  
601 that forms GlcNAc $\alpha$ 1 $\rightarrow$ 4Gal $\beta$  $\rightarrow$ R, a glycan specifically expressed in the gastric gland  
602 mucous cell-type mucin. *Proceedings of the National Academy of Sciences of the United*  
603 *States of America* **96**, 8991-8996, doi:10.1073/pnas.96.16.8991 (1999).
- 604 30 Ishihara, K. *et al.* Peripheral  $\alpha$ -linked N-acetylglucosamine on the carbohydrate moiety  
605 of mucin derived from mammalian gastric gland mucous cells: epitope recognized by a newly  
606 characterized monoclonal antibody. *The Biochemical journal* **318 ( Pt 2)**, 409-416,  
607 doi:10.1042/bj3180409 (1996).
- 608 31 Tempel, W. *et al.* Three-dimensional structure of GlcNAc $\alpha$ 1-4Gal releasing endo-beta-  
609 galactosidase from *Clostridium perfringens*. *Proteins* **59**, 141-144, doi:10.1002/prot.20363  
610 (2005).
- 611 32 Catterson, B. & Melrose, J. Keratan sulfate, a complex glycosaminoglycan with unique  
612 functional capability. *Glycobiology* **28**, 182-206, doi:10.1093/glycob/cwy003 (2018).
- 613 33 Yamagishi, K. *et al.* Purification, characterization, and molecular cloning of a novel keratan  
614 sulfate hydrolase, endo-beta-N-acetylglucosaminidase, from *Bacillus circulans*. *The Journal*  
615 *of biological chemistry* **278**, 25766-25772, doi:10.1074/jbc.M212183200 (2003).

- 616 34 Wang, H. *et al.* Construction and functional characterization of truncated versions of  
617 recombinant keratanase II from *Bacillus circulans*. *Glycoconjugate journal* **34**, 643-649,  
618 doi:10.1007/s10719-017-9786-3 (2017).
- 619 35 Fukuda, M. N. & Matsumura, G. Endo-beta-galactosidase of *Escherichia freundii*. Purification  
620 and endoglycosidic action on keratan sulfates, oligosaccharides, and blood group active  
621 glycoprotein. *The Journal of biological chemistry* **251**, 6218-6225 (1976).
- 622 36 Scudder, P., Uemura, K., Dolby, J., Fukuda, M. N. & Feizi, T. Isolation and characterization of  
623 an endo-beta-galactosidase from *Bacteroides fragilis*. *The Biochemical journal* **213**, 485-494,  
624 doi:10.1042/bj2130485 (1983).
- 625 37 Hirano, S. & Meyer, K. Enzymatic degradation of corneal and cartilaginous keratosulfates.  
626 *Biochemical and biophysical research communications* **44**, 1371-1375, doi:10.1016/s0006-  
627 291x(71)80237-1 (1971).
- 628 38 Biarnes, X. *et al.* The conformational free energy landscape of beta-D-glucopyranose.  
629 Implications for substrate preactivation in beta-glucoside hydrolases. *Journal of the*  
630 *American Chemical Society* **129**, 10686-10693, doi:10.1021/ja068411o (2007).
- 631 39 Labourel, A. *et al.* Structural and biochemical characterization of the laminarinase  
632 ZgLamCGH16 from *Zobellia galactanivorans* suggests preferred recognition of branched  
633 laminarin. *Acta crystallographica. Section D, Biological crystallography* **71**, 173-184,  
634 doi:10.1107/s139900471402450x (2015).
- 635 40 Allouch, J., Helbert, W., Henrissat, B. & Czjzek, M. Parallel substrate binding sites in a beta-  
636 agarase suggest a novel mode of action on double-helical agarose. *Structure (London,*  
637 *England : 1993)* **12**, 623-632, doi:10.1016/j.str.2004.02.020 (2004).
- 638 41 Vasur, J. *et al.* X-ray crystal structures of *Phanerochaete chrysosporium* Laminarinase 16A in  
639 complex with products from lichenin and laminarin hydrolysis. *The FEBS journal* **276**, 3858-  
640 3869, doi:10.1111/j.1742-4658.2009.07099.x (2009).
- 641 42 Matard-Mann, M. *et al.* Structural insights into marine carbohydrate degradation by family  
642 GH16 kappa-carrageenases. *The Journal of biological chemistry* **292**, 19919-19934,  
643 doi:10.1074/jbc.M117.808279 (2017).
- 644 43 Davies, G. J. *et al.* Snapshots along an enzymatic reaction coordinate: analysis of a retaining  
645 beta-glycoside hydrolase. *Biochemistry* **37**, 11707-11713, doi:10.1021/bi981315i (1998).
- 646 44 Davies, G. J., Tolley, S. P., Henrissat, B., Hjort, C. & Schulein, M. Structures of oligosaccharide-  
647 bound forms of the endoglucanase V from *Humicola insolens* at 1.9 Å resolution.  
648 *Biochemistry* **34**, 16210-16220, doi:10.1021/bi00049a037 (1995).

649 45 Tamura, K. *et al.* Molecular Mechanism by which Prominent Human Gut Bacteroidetes  
650 Utilize Mixed-Linkage Beta-Glucans, Major Health-Promoting Cereal Polysaccharides. *Cell*  
651 *Rep* **21**, 417-430, doi:10.1016/j.celrep.2017.09.049 (2017).

652 46 Hehemann, J. H. *et al.* Biochemical and structural characterization of the complex agarolytic  
653 enzyme system from the marine bacterium *Zobellia galactanivorans*. *The Journal of*  
654 *biological chemistry* **287**, 30571-30584, doi:10.1074/jbc.M112.377184 (2012).

655 47 Briliute, J. *et al.* Complex N-glycan breakdown by gut *Bacteroides* involves an extensive  
656 enzymatic apparatus encoded by multiple co-regulated genetic loci. *Nature microbiology* **4**,  
657 1571-1581, doi:10.1038/s41564-019-0466-x (2019).

658

659

660  
661  
662

**Supplementary Table 1 | Percentage identity between all members of the GH16 family included in this study**

|                              | BT2824 <sup>GH16</sup> | BF4058 <sup>GH16</sup> | BF4060 <sup>GH16</sup> | Baccac_02679 <sup>GH16</sup> | Baccac_02680 <sup>GH16</sup> | Baccac_03717 <sup>GH16</sup> | Amuc_0724 <sup>GH16</sup> | Amuc_0875 <sup>GH16</sup> | Amuc_2108 <sup>GH16</sup> |
|------------------------------|------------------------|------------------------|------------------------|------------------------------|------------------------------|------------------------------|---------------------------|---------------------------|---------------------------|
| BT2824 <sup>GH16</sup>       | 100 %                  | 38 %                   | 37 %                   | 38 %                         | 38 %                         | 35 %                         | 27 %                      | 25 %                      | 30 %                      |
| BF4058 <sup>GH16</sup>       |                        | 100 %                  | 28 %                   | 87 %                         | 27 %                         | 31 %                         | 29 %                      | 26 %                      | 29 %                      |
| BF4060 <sup>GH16</sup>       |                        |                        | 100 %                  | 29 %                         | 79 %                         | 31 %                         | 26 %                      | 24 %                      | 29 %                      |
| Baccac_02679 <sup>GH16</sup> |                        |                        |                        | 100 %                        | 27 %                         | 31 %                         | 29 %                      | 27 %                      | 29 %                      |
| Baccac_02680 <sup>GH16</sup> |                        |                        |                        |                              | 100 %                        | 31 %                         | 24 %                      | 22 %                      | 28 %                      |
| Baccac_03717 <sup>GH16</sup> |                        |                        |                        |                              |                              | 100 %                        | 30 %                      | 28 %                      | 36 %                      |
| Amuc_0724 <sup>GH16</sup>    |                        |                        |                        |                              |                              |                              | 100 %                     | 34 %                      | 29 %                      |
| Amuc_0875 <sup>GH16</sup>    |                        |                        |                        |                              |                              |                              |                           | 100 %                     | 23 %                      |
| Amuc_2108 <sup>GH16</sup>    |                        |                        |                        |                              |                              |                              |                           |                           | 100 %                     |

663  
664

665  
666

**Supplementary Table 2 | Signal peptide predictions and likely cellular locations of the Cazymes characterised in this study.**

| Species                    | Locus Tag    | Cazy Classification | Predicted signal peptide <sup>a</sup> | Experimentally determined location |
|----------------------------|--------------|---------------------|---------------------------------------|------------------------------------|
| <i>B. thetaiotaomicron</i> | BT2824       | GH16                | SPII                                  |                                    |
| <i>B. fragilis</i>         | BF4058       | GH16                | SPII                                  |                                    |
| <i>B. fragilis</i>         | BF4059       | GH20                | SPII                                  |                                    |
| <i>B. fragilis</i>         | BF4060       | GH16                | SPI                                   |                                    |
| <i>B. fragilis</i>         | BF4061       | GH35                | SPI                                   |                                    |
| <i>B. caccae</i>           | Baccac_02679 | GH16                | SPII                                  |                                    |
| <i>B. caccae</i>           | Baccac_02680 | GH16                | SPI                                   |                                    |
| <i>B. caccae</i>           | Baccac_03717 | GH16                | SPII                                  |                                    |
| <i>A. muciniphila</i>      | Amuc_0724    | GH16                | nd                                    |                                    |
| <i>A. muciniphila</i>      | Amuc_0875    | GH16                | SPI                                   |                                    |
| <i>A. muciniphila</i>      | Amuc_2108    | GH16                | SPI <sup>b</sup>                      | Outer membrane <sup>20</sup>       |

667  
668  
669

<sup>a</sup>Predictions carried out using SigP5.0

<sup>b</sup>Has a very hydrophobic region at the C-terminus that could be a membrane anchor

670  
671  
672

**Supplementary Table 3 | List of strains used in this study, the locus tag prefixes and also shortened versions used in Supplementary Figs. 5-7.**

| Species                    | Strain analysed | True locus tag prefix | Prefix used for brevity in Supplementary Fig. 20 |
|----------------------------|-----------------|-----------------------|--------------------------------------------------|
| <i>A. muciniphila</i>      | ATCC            | Amuc                  | Amuc                                             |
| <i>B. caecimuris</i>       | I48             | Bcae                  | Bcae                                             |
| <i>B. caccae</i>           | ATCC43185       | BACCAC                | BC                                               |
| <i>B. cellulosityticus</i> | DSM 14838       | BACCELL               | BAC                                              |
| <i>B. dorei</i>            | DSM 17855       | BACDOR                | BACDOR                                           |
| <i>B. fragilis</i>         | NCTC 9343       | BF                    | BF                                               |
| <i>B. finegoldii</i>       | DSM 17565       | BACFIN                | BACFIN                                           |
| <i>B. helocogenes</i>      | DSM 20613       | Bache                 | Bache                                            |
| <i>B. heparinolyticus</i>  | DSM 23917       | Bhep                  | Bhep                                             |
| <i>B. intestinalis</i>     | 341, DSM 17393  | BACINT                | BACINT                                           |
| <i>B. plebius</i>          | DSM 17135       | BACPLE                | BACPLE                                           |
| <i>B. thetaiotaomicron</i> | VPI-5482        | BT                    | BT                                               |
| <i>B. ovatus</i>           | ATCC 8482       | BACOVA                | BO                                               |
| <i>B. vulatus</i>          | ATCC 8483       | BVU                   | BVU                                              |
| <i>B. xylanisolvens</i>    | XB1A            | BXY                   | BXY                                              |

673

**Supplementary Table 4 | Activity of GH16 family members against specific O-glycan substrates** This summarises the enzyme activities of the GH16 family members analysed in this study and characterises what sugars and linkages can be accommodated at different subsites. The information is derived from Supplementary Figs. 13-15. The blue text specifically refers to the results obtained from the substrate depletion data where substrate preferences were analysed in greater detail (Supplementary Fig. 13).

|                   | BT2824 <sup>GH16</sup>                                                                                                                    | BF4058 <sup>GH16</sup>                                                  | BF4060 <sup>GH16</sup>                         | Baccac_02679 <sup>GH16</sup>                   | Baccac_02680 <sup>GH16</sup>                   | Baccac_03717 <sup>GH16</sup>              | Amuc_0724 <sup>GH16</sup>               | Amuc_0875 <sup>GH16</sup>                                               | Amuc_2108 <sup>GH16</sup> |                                           |
|-------------------|-------------------------------------------------------------------------------------------------------------------------------------------|-------------------------------------------------------------------------|------------------------------------------------|------------------------------------------------|------------------------------------------------|-------------------------------------------|-----------------------------------------|-------------------------------------------------------------------------|---------------------------|-------------------------------------------|
| Linear substrates | <b>TriLacNAc</b> spanning -3 to +3 subsites (Supplementary Fig Xa)                                                                        | Yes                                                                     | Yes                                            | Yes                                            | Yes                                            | Yes                                       | Yes                                     | Partial                                                                 | Yes                       |                                           |
|                   | <b>TriLacNAc product</b> GlcNAc $\beta$ 1,3Gal $\beta$ 1,4GlcNAc spanning the -2 to +1 subsites (Supplementary Fig Xa)                    | Yes                                                                     | Yes                                            | Yes                                            | Yes                                            | Yes                                       | Yes                                     | Partial                                                                 | Yes                       |                                           |
|                   | <b>Lacto-N-neotetraose</b> spanning the -3 to +1 subsites (Supplementary Fig Xb)                                                          | Yes<br>Reduced rate relative to TriLacNAc<br><b>Preference over LNT</b> | Yes<br>Very reduced rate relative to TriLacNAc | Yes<br>Very reduced rate relative to TriLacNAc | Yes<br>Very reduced rate relative to TriLacNAc | Yes<br>Reduced rate relative to TriLacNAc | Yes<br>Unaffected relative to TriLacNAc | Yes<br>Reduced rate relative to TriLacNAc<br><b>Preference over LNT</b> | No                        | Yes<br>Reduced rate relative to TriLacNAc |
|                   | <b>Lacto-N-neotetraose product</b> Gal $\beta$ 1,4GlcNAc $\beta$ 1,3Gal spanning the -1 to +2 or -2 to +1 subsites (Supplementary Fig Xb) | Yes                                                                     | No                                             | No                                             | No                                             | No                                        | Yes                                     | Partial                                                                 | No                        | Partial                                   |





|                                                                                        |                                                                |                                                                                           |                                                           |                                                               |                                         |                                                        |                                                           |                                                             |    |                                                               |
|----------------------------------------------------------------------------------------|----------------------------------------------------------------|-------------------------------------------------------------------------------------------|-----------------------------------------------------------|---------------------------------------------------------------|-----------------------------------------|--------------------------------------------------------|-----------------------------------------------------------|-------------------------------------------------------------|----|---------------------------------------------------------------|
| α1,4<br>fucose<br>branch<br>at the -<br>3'<br>subsite                                  | <b>Lacto-N-fucopentaose II</b> spanning the -3' to +1 subsites | Yes                                                                                       | Yes                                                       | Yes                                                           | Partial                                 | Yes                                                    | Yes                                                       | Partial                                                     | No | Yes                                                           |
| Blood<br>groups<br>α-<br>linked<br>sugars<br>at the -<br>4 and -<br>4'<br>subsite<br>s | <b>Blood Group A hexasaccharide II</b>                         | Yes<br>Reduced<br>rate<br>relative to<br>LNT and<br>LNnT.                                 | Yes<br>Reduced<br>rate<br>relative to<br>LNT and<br>LNnT. | Partial<br>Reduced<br>rate<br>relative to<br>LNT and<br>LNnT. | No                                      | Partial                                                | Yes<br>Reduced<br>rate<br>relative to<br>LNT and<br>LNnT. | Yes<br>Rate<br>unaffected<br>relative to<br>LNT and<br>LNnT | No | Partial<br>Reduced<br>rate<br>relative to<br>LNT and<br>LNnT. |
|                                                                                        | <b>Blood Group B hexasaccharide II</b>                         | Yes<br>Reduced<br>rate<br>relative to<br>LNT and<br>LNnT.<br><b>Preference for over A</b> | Yes<br>Reduced<br>rate<br>relative to<br>LNT and<br>LNnT. | Yes                                                           | No                                      | Partial                                                | Yes<br>Reduced<br>rate<br>relative to<br>LNT and<br>LNnT. | Yes<br>Rate<br>unaffected<br>relative to<br>LNT and<br>LNnT | No | Partial<br>Reduced<br>rate<br>relative to<br>LNT and<br>LNnT. |
|                                                                                        | <b>Blood Group H pentasaccharide II</b>                        | Yes<br>Improved<br>rate<br>relative to<br>BGA and<br>B                                    | Yes<br>Same rate<br>to BGA<br>and B                       | Yes<br>Improved<br>rate<br>relative to<br>BGA and<br>B        | Partial<br>Same rate<br>to BGA<br>and B | Yes<br>Improved<br>rate<br>relative to<br>BGA and<br>B | Yes<br>Improved<br>rate<br>relative to<br>BGA and<br>B    | Yes<br>Rate<br>unaffected<br>relative to<br>all             | No | Partial<br>Rate<br>unaffected<br>relative to<br>BGA and<br>B  |

**Supplementary Table 5 | Data collection and refinement statistics**

|                                                     | Amuc_0724 <sup>GH1</sup><br>6                 | Baccac_02680 <sup>G</sup><br>H <sup>16</sup> ligand | Baccac_0371<br>7 <sup>GH16</sup> | BF4060 <sup>GH16</sup><br>ligand |
|-----------------------------------------------------|-----------------------------------------------|-----------------------------------------------------|----------------------------------|----------------------------------|
| Date                                                | 25/01/19                                      | 25/11/18                                            | 11/10/18                         | 11/10/18                         |
| Source                                              | I24                                           | I03                                                 | I03                              | I03                              |
| Wavelength (Å)                                      | 0.9786                                        | 0.9793                                              | 0.9796                           | 0.9796                           |
| Space group                                         | P2 <sub>1</sub> 2 <sub>1</sub> 2 <sub>1</sub> | P4 <sub>1</sub>                                     | C222 <sub>1</sub>                | P6 <sub>1</sub> 22               |
| Cell dimensions                                     |                                               |                                                     |                                  |                                  |
| <i>a</i> , <i>b</i> , <i>c</i> (Å)                  | 87.5, 96.1,<br>128.8                          | 82.92, 82.92,<br>121.31                             | 46.9, 87.1,<br>156.2             | 156.6, 156.6,<br>197.0           |
| α, β, γ (°)                                         | 90, 90, 90                                    | 90, 90, 90                                          | 90, 90, 90                       | 90.0, 90.0,<br>120.0             |
| No. of measured reflections                         | 214047<br>(21796)                             | 418545 (31263)                                      | 136701<br>(11117)                | 469646<br>(98047)                |
| No. of independent reflections                      | 33993 (4096)                                  | 55261 (4092)                                        | 19202 (1554)                     | 22156 (4469)                     |
| Resolution (Å)                                      | 19.90 – 2.70<br>(2.83 – 2.70)                 | 19.99 – 2.00<br>(2.05 – 2.00)                       | 43.57 – 2.10<br>(2.16 – 2.10)    | 197.05 – 3.30<br>( 3.56 – 3.30)  |
| CC <sub>1/2</sub>                                   | 0.991 (0.485)                                 | 0.999 (0.472)                                       | 0.995 (0.743)                    | 0.992 (0.679)                    |
| <i>I</i> / <i>σ</i> <i>I</i>                        | 7.7 (1.0)                                     | 14.0 (1.2)                                          | 7.6 (1.6)                        | 5.1 (1.7)                        |
| Completeness (%)                                    | 99.7 (100.0)                                  | 99.2 (98.4)                                         | 100.0 (100.0)                    | 100.0 (100.0)                    |
| Redundancy                                          | 6.4 (5.4)                                     | 7.6 (7.6)                                           | 7.1 (7.2)                        | 21.2 (21.9)                      |
| <b>Refinement</b>                                   |                                               |                                                     |                                  |                                  |
| <i>R</i> <sub>work</sub> / <i>R</i> <sub>free</sub> | 20.51 / 25.90                                 | 19.39 / 22.59                                       | 19.72 / 24.20                    | 19.45 / 25.38                    |
| No. atoms                                           |                                               |                                                     |                                  |                                  |
| Protein                                             | 4450                                          | 3999                                                | 2035                             | 5811                             |
| Ligand/Ions                                         | 2                                             | 16                                                  | 10                               | 111                              |
| Water                                               | 0                                             | 99                                                  | 126                              | 0                                |
| B-factors                                           |                                               |                                                     |                                  |                                  |
| Protein                                             | 75.2                                          | 47.4                                                | 34.1                             | 66.1                             |
| Ligand/Ions                                         | 108.7                                         | 46.4                                                | 52.2                             | 68.2                             |
| Water                                               | N.A.                                          | 43.3                                                | 36.2                             | N.A.                             |
| R.m.s deviations                                    |                                               |                                                     |                                  |                                  |
| Bond lengths (Å)                                    | 0.011                                         | 0.011                                               | 0.010                            | 0.014                            |
| Bond angles (°)                                     | 2.01                                          | 1.71                                                | 1.73                             | 2.31                             |
| Ramachandran plot (%)                               | 87.1 / 3.6                                    | 97.5 / 0.0                                          | 92.6 / 2.0                       | /                                |
| Favoured/Outliers PDB                               |                                               |                                                     |                                  |                                  |

Values in parenthesis are for the highest resolution shell. R<sub>free</sub> was calculated using a set (5%) of randomly selected reflections that were excluded from

**Supplementary Table 6 | Crystallisation conditions for the GH16 enzymes**

| <b>Enzyme (#)</b>                               | <b>Ligand</b> | <b>Condition</b>                                             | <b>Cryoprotectant</b> |
|-------------------------------------------------|---------------|--------------------------------------------------------------|-----------------------|
| Amuc_0724 (10 mg/ml)                            | apo           | 1.6 M tri-sodium citrate<br>pH 6.5                           | Paratone-N            |
| Baccac__02680 <sup>GH16</sup> (8.1 mg/ml)       | apo           | 20 % PEG3350, 0.24 M sodium malonate pH7.0                   | 25 % ethylene glycol  |
| Baccac__02680 <sup>GH16E143Q</sup> (8.1 mg/ml)  | apo           | 24 % PEG3350, 0.45 M sodium malonate pH7.0                   | 25 % ethylene glycol  |
| Baccac__02680 <sup>GH16 E143Q</sup> (8.1 mg/ml) | L404          | 24 % PEG3350, 0.45 M sodium malonate pH7.0                   | 25 % ethylene glycol  |
| Baccac__02680 <sup>GH16 E143Q</sup> (8.1 mg/ml) | TriLacNAc     | 24 % PEG3350, 0.45 M sodium malonate pH7.0                   | 25 % ethylene glycol  |
| Baccac__03717 <sup>GH16</sup> (10 mg/ml)        | apo           | 1.0 M Ammonium sulphate                                      | 33 % ethylene glycol  |
| BF4060 <sup>GH16</sup> (9.6 mg/ml)              | TriLacNAc     | 20 % PEG6000, 1 M lithium chloride, 0.1 M Citric acid pH 4.0 | 25 % ethylene glycol  |

# Initial concentration

**a**

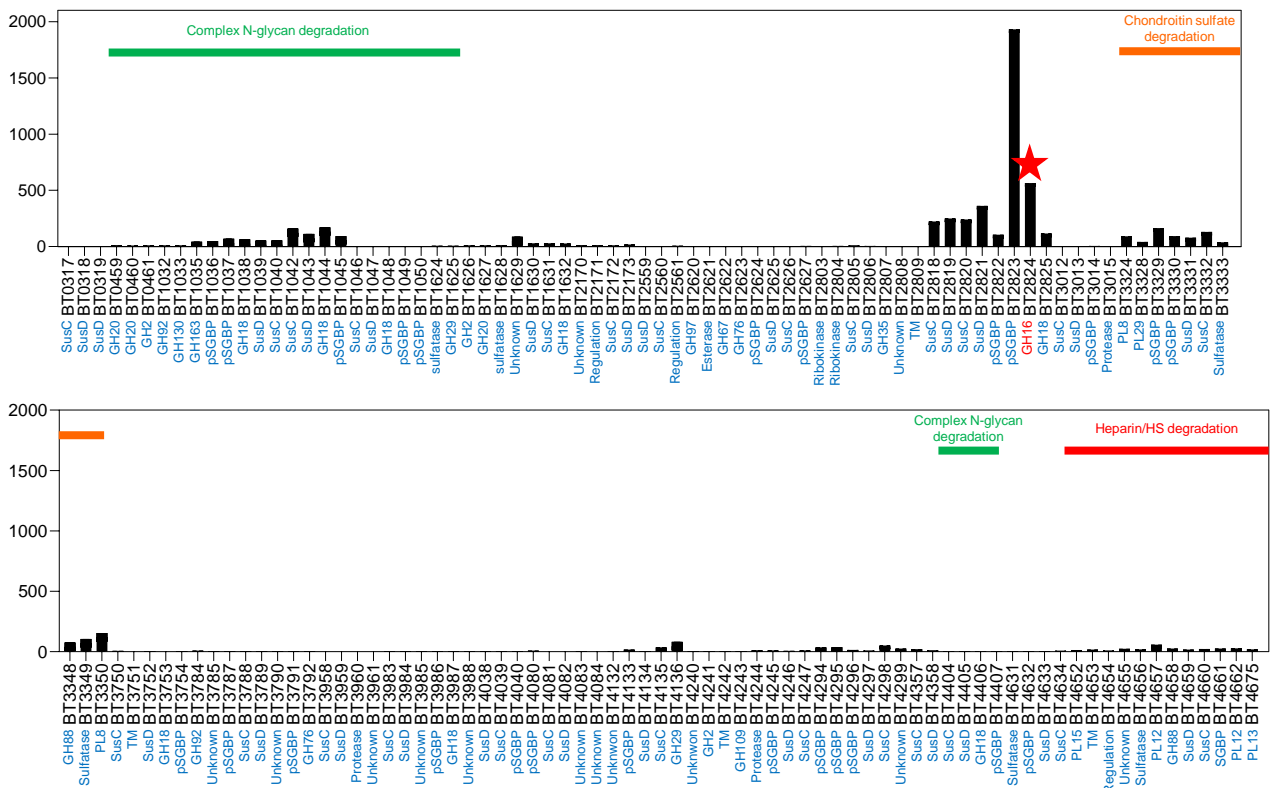

**b**

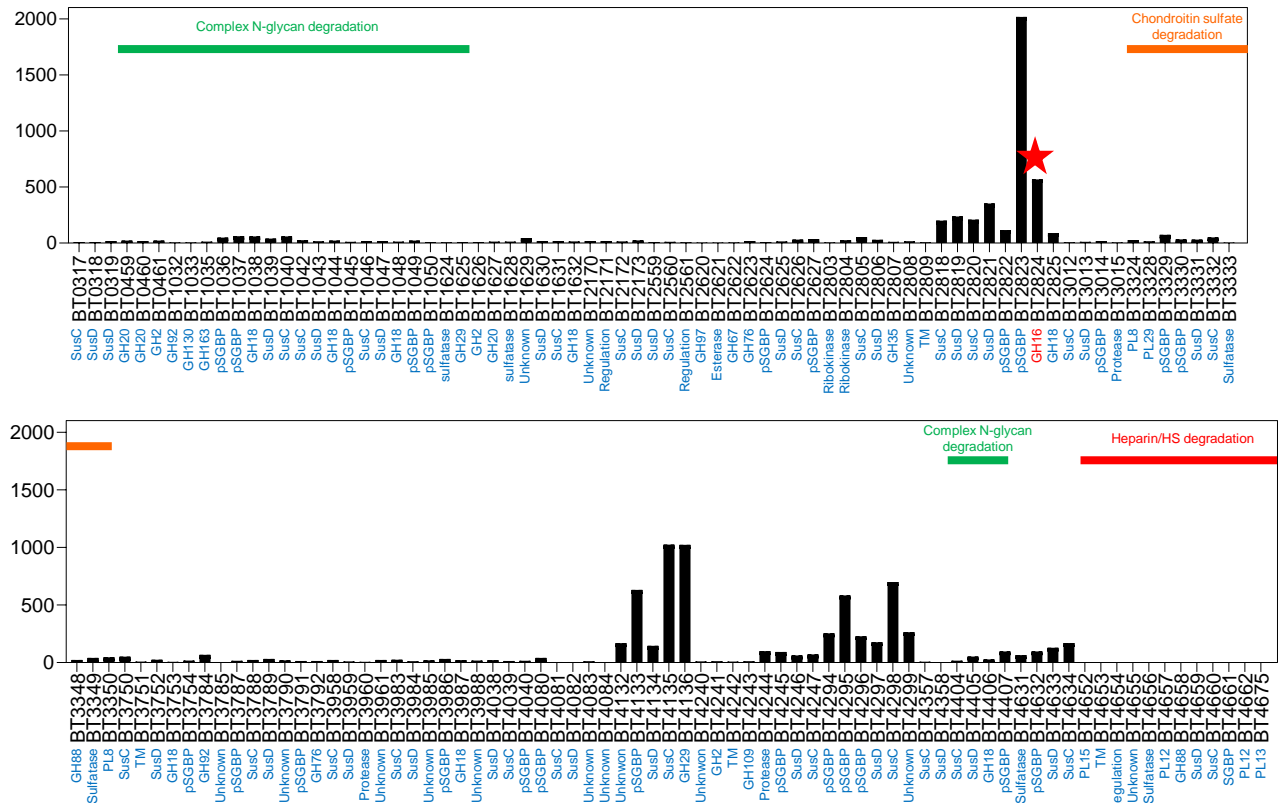

**Supplementary Figure 1 | Upregulation of *Bacteroides thetaiotaomicron* genes on mucin O-glycans** Genes upregulated at least 10-fold *in vitro* using purified mucin O-glycans from PGM type III (Sigma) as the carbon source relative to glucose-grown cells (Martens *et al.* 2008) **a**, early in the growth curve. **b**, late in the growth curve. A number of PULs and non-PUL Cazyme containing loci were upregulated, including those involved in complex N-glycan and glycosaminoglycan degradation. The GH16 family member is indicated to by a red star

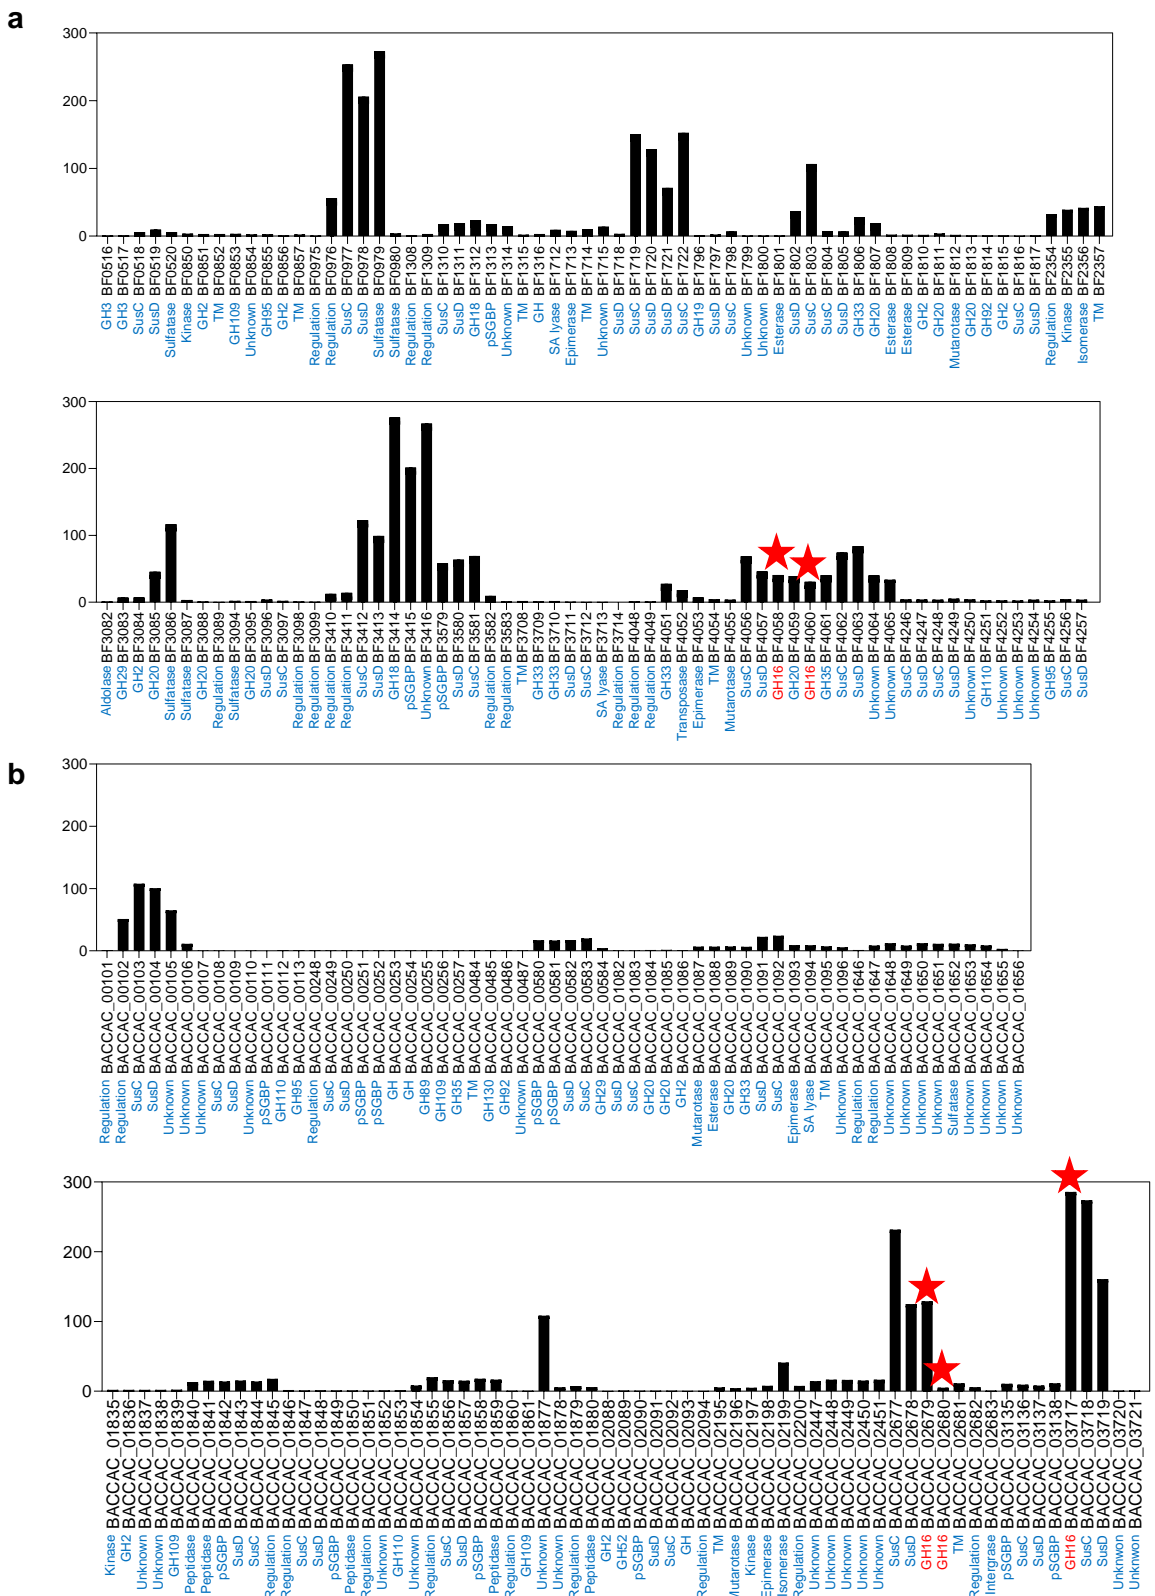

**Supplementary Figure 2 | Upregulation of *Bacteroides fragilis* and *Bacteroides caccae* genes on mucin O-glycans**  
 Genes upregulated at least 10-fold *in vitro* using purified mucin O-glycans from PGM III (Sigma) as the carbon source relative to glucose-grown cells **a**, *Bacteroides fragilis* (Pudlo *et al.* 2015). **b**, *Bacteroides caccae* (Desai *et al.* 2016). The GH16 family members are indicated to by a red star.

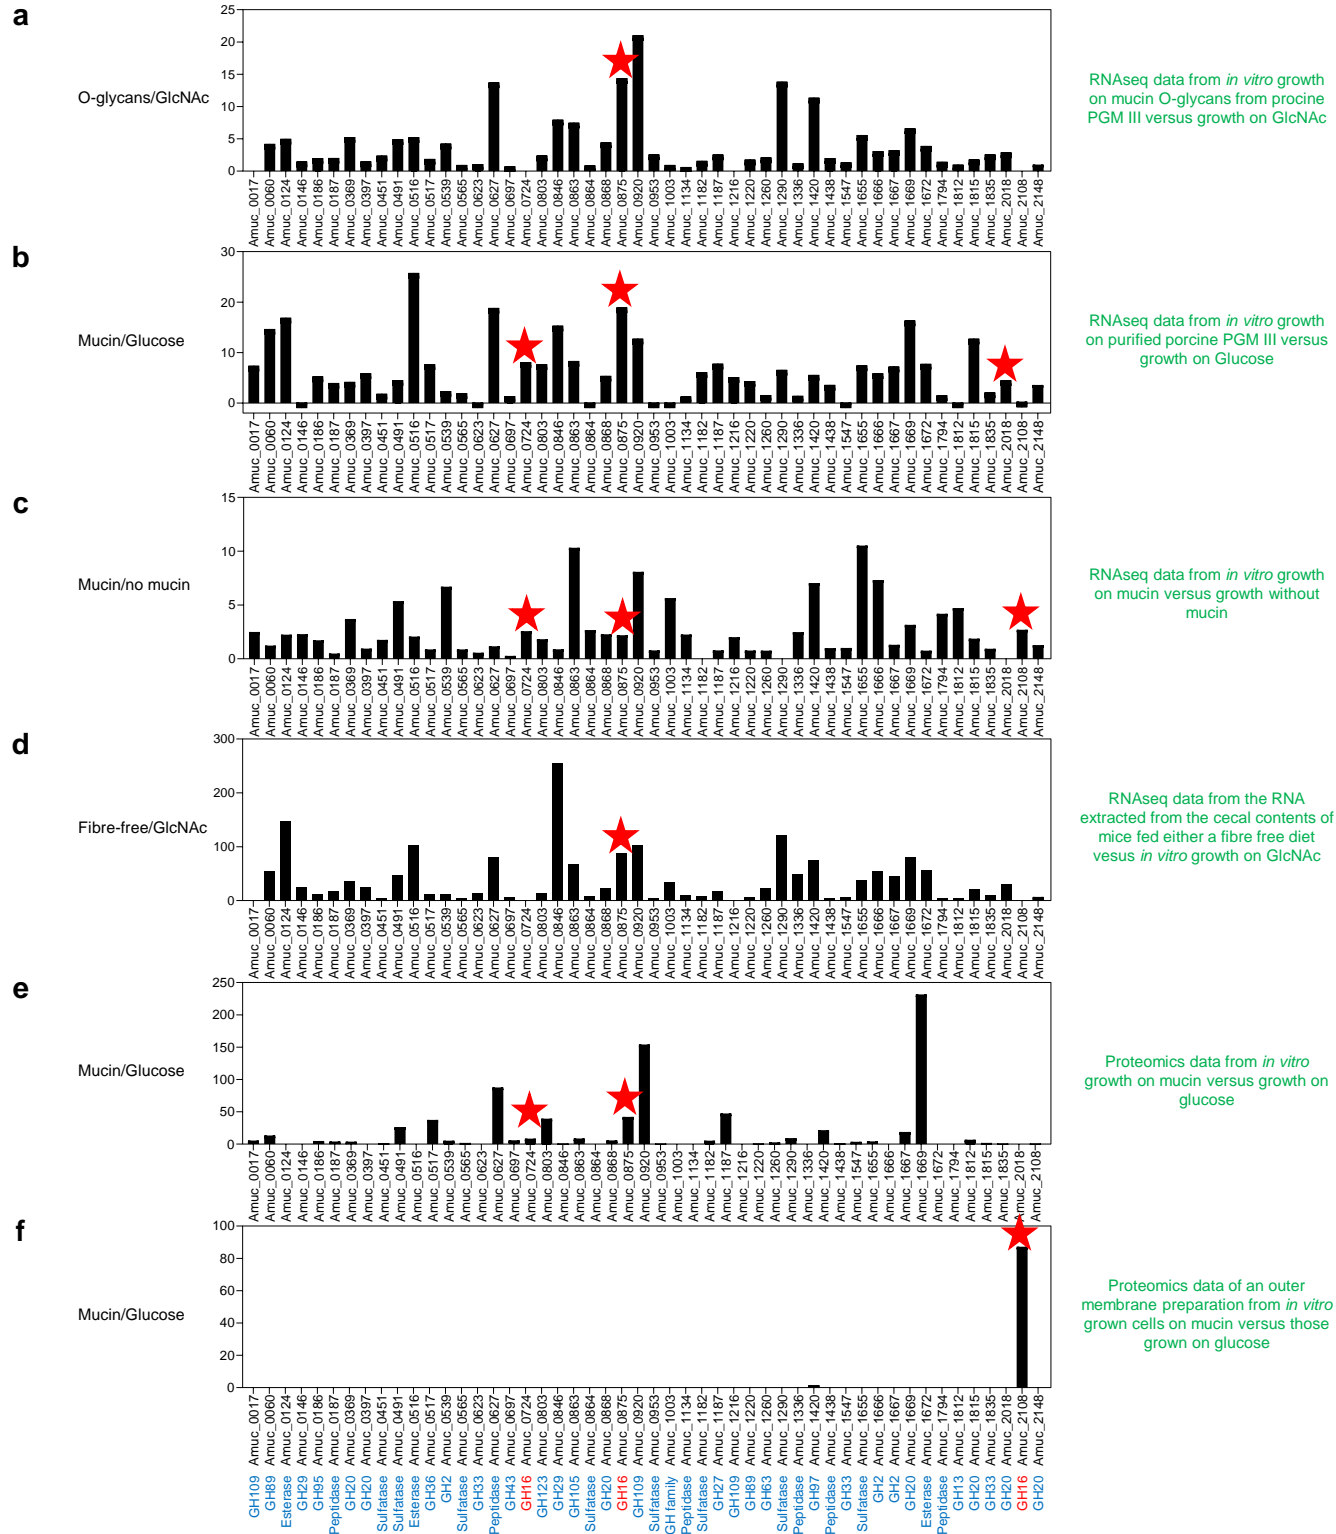

**Supplementary Figure 3 | Upregulation of *A. muciniphila* genes and protein levels during growth on mucins *in vitro* and *in vivo*** **a**, Genes that are upregulated *in vitro* using purified mucin O-glycans as the carbon source relative to a culture grown on GlcNAc (Desai *et al.* 2016). **b**, Genes that are upregulated *in vitro* using purified porcine gastric mucin Type III (Sigma) as the carbon source relative to a culture grown on GlcNAc (Ottman *et al.* 2017). **c**, Genes that are upregulated *in vitro* using purified mucin O-glycans as the carbon source relative to a culture grown on GlcNAc (Shin *et al.* 2019). **d**, Genes that are upregulated when a mouse is fed a fibre-free diet compared to a simple sugar diet (Desai). **e**, Relative protein levels during *in vitro* growth on purified PGM III compared to growth on glucose (Ottman *et al.* 2016). **f**, Relative protein levels in the outer membrane fraction during growth on purified PGM III compared to growth on glucose (Ottman *et al.* 2016). It should be noted that the *in vitro* growths a-c were performed in different basal medias. The GH16 family members are indicated by a red star.

**a** Agarose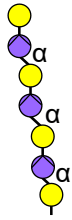**b**  $\kappa$ -Carrageenan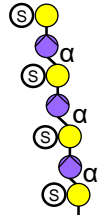**c** Porphyran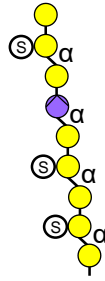**d** Laminarin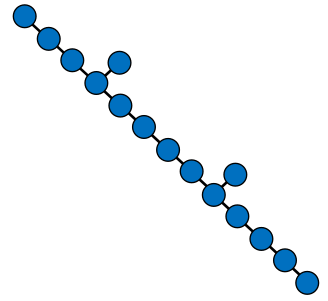**e** Barley  $\beta$ -glucan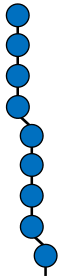**f** Lichenan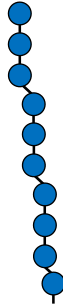**g**  $\beta$ 1,3-galactan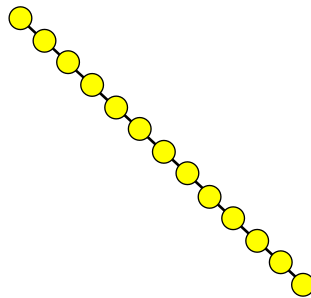**h** Pectic galactan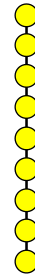**i** Xyloglucan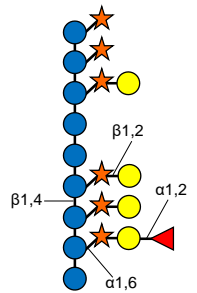**j** Chitin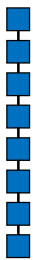**k** Keratan sulfate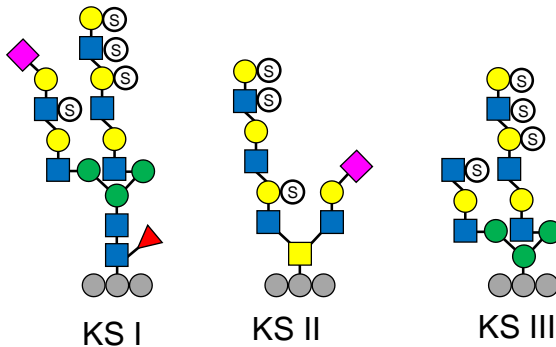**l** O-glycan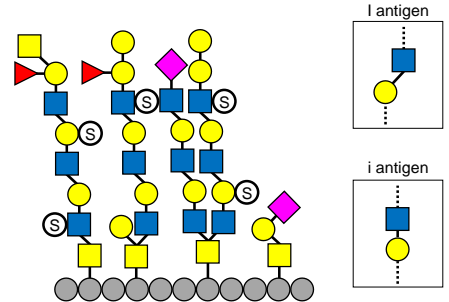

3,6-anhydrogalactose

Galactose

Sulfation

Glucose

GlcNAc

Fucose

Fucose

Mannose

GalNAc

Neu5Ac

Neu5Gc

Amino acid

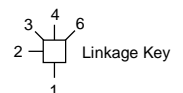

**Supplementary Figure 4 | Classes of glycan targeted by GH16 enzymes.** **a**, Agarose ( $\alpha$ 1,3-3,6-anhydrogalactose- $\beta$ 1,4-galactose repeating units). **b**,  $\kappa$ -carrageenan ( $\alpha$ 1,3-3,6-anhydrogalactose- $\beta$ 1,4-galactose6S repeating units). **c**, Porphyran ( $\alpha$ 1,4-galactose6S- $\beta$ 1,3-galactose repeating units where the galactose6S is sometimes replaced with 3,6-anhydrogalactose). **d**, Laminarin ( $\beta$ 1,4-glucan with occasional  $\beta$ 1,6-glucose decoration). **e**, Barley  $\beta$ -glucan ( $\beta$ 1,4-glucan with occasional  $\beta$ 1,3-linkages). **f**, Lichenan (predominantly  $\beta$ 1,4-glucan with ~25 %  $\beta$ 1,3-linkages). **g**,  $\beta$ 1,3-galactan (arabinogalactan backbone;  $\beta$ 1,3-linkages). **h**, Pectic galactan ( $\beta$ 1,4-linkages). **i**, Xyloglucan (linkages displayed do not follow the key, but are labelled). **j**, Chitin ( $\beta$ 1,4-linkages). **k**, Keratan sulfate (polyLacNAc structures that can be O- or N-linked to protein, 6S decoration possible on galactose and GlcNAc and occasional sialylation and fucosylation). **l**, Mucin O-glycans. In keratan sulfate and O-glycan structures the GlcNAc sugars can also be linked through  $\beta$ 1,4 and  $\beta$ 1,6 linkages (boxes).



**a**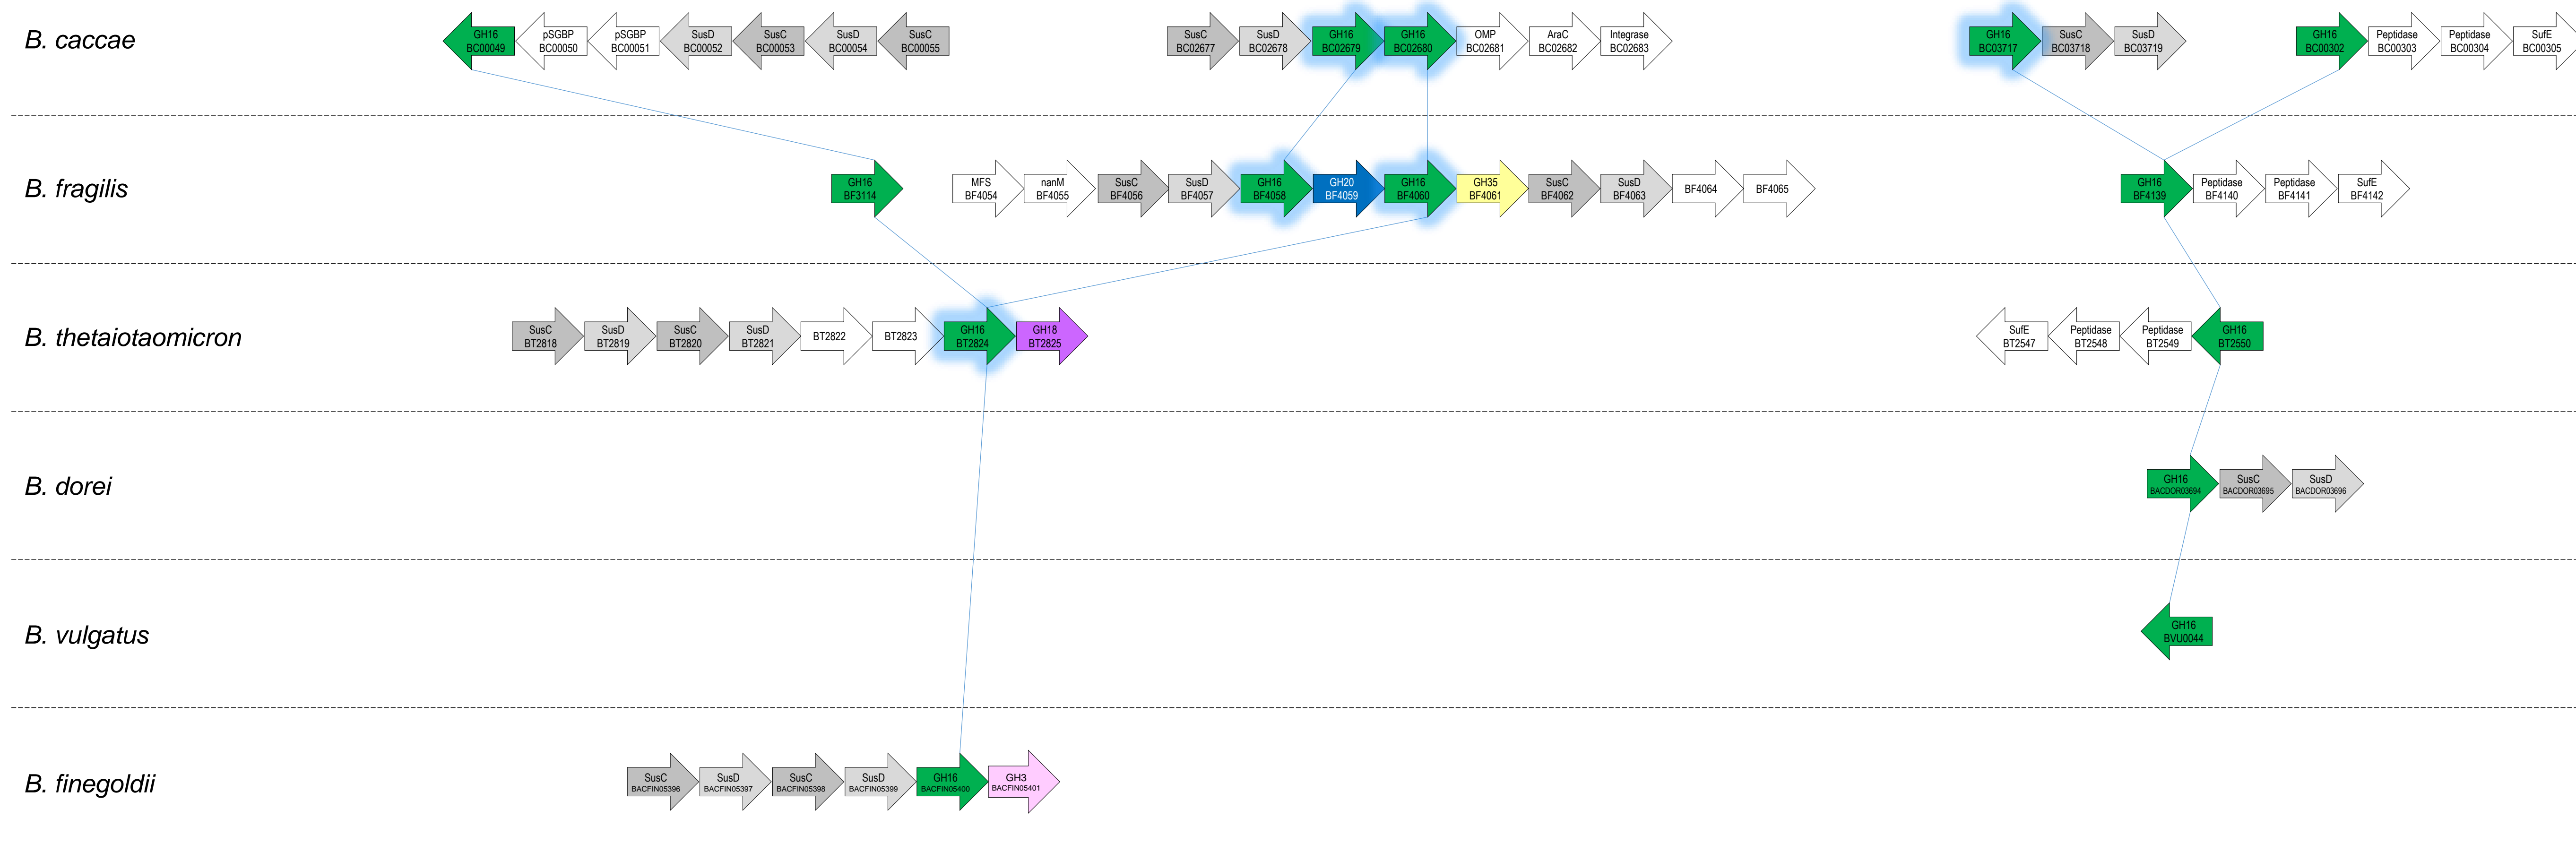**b**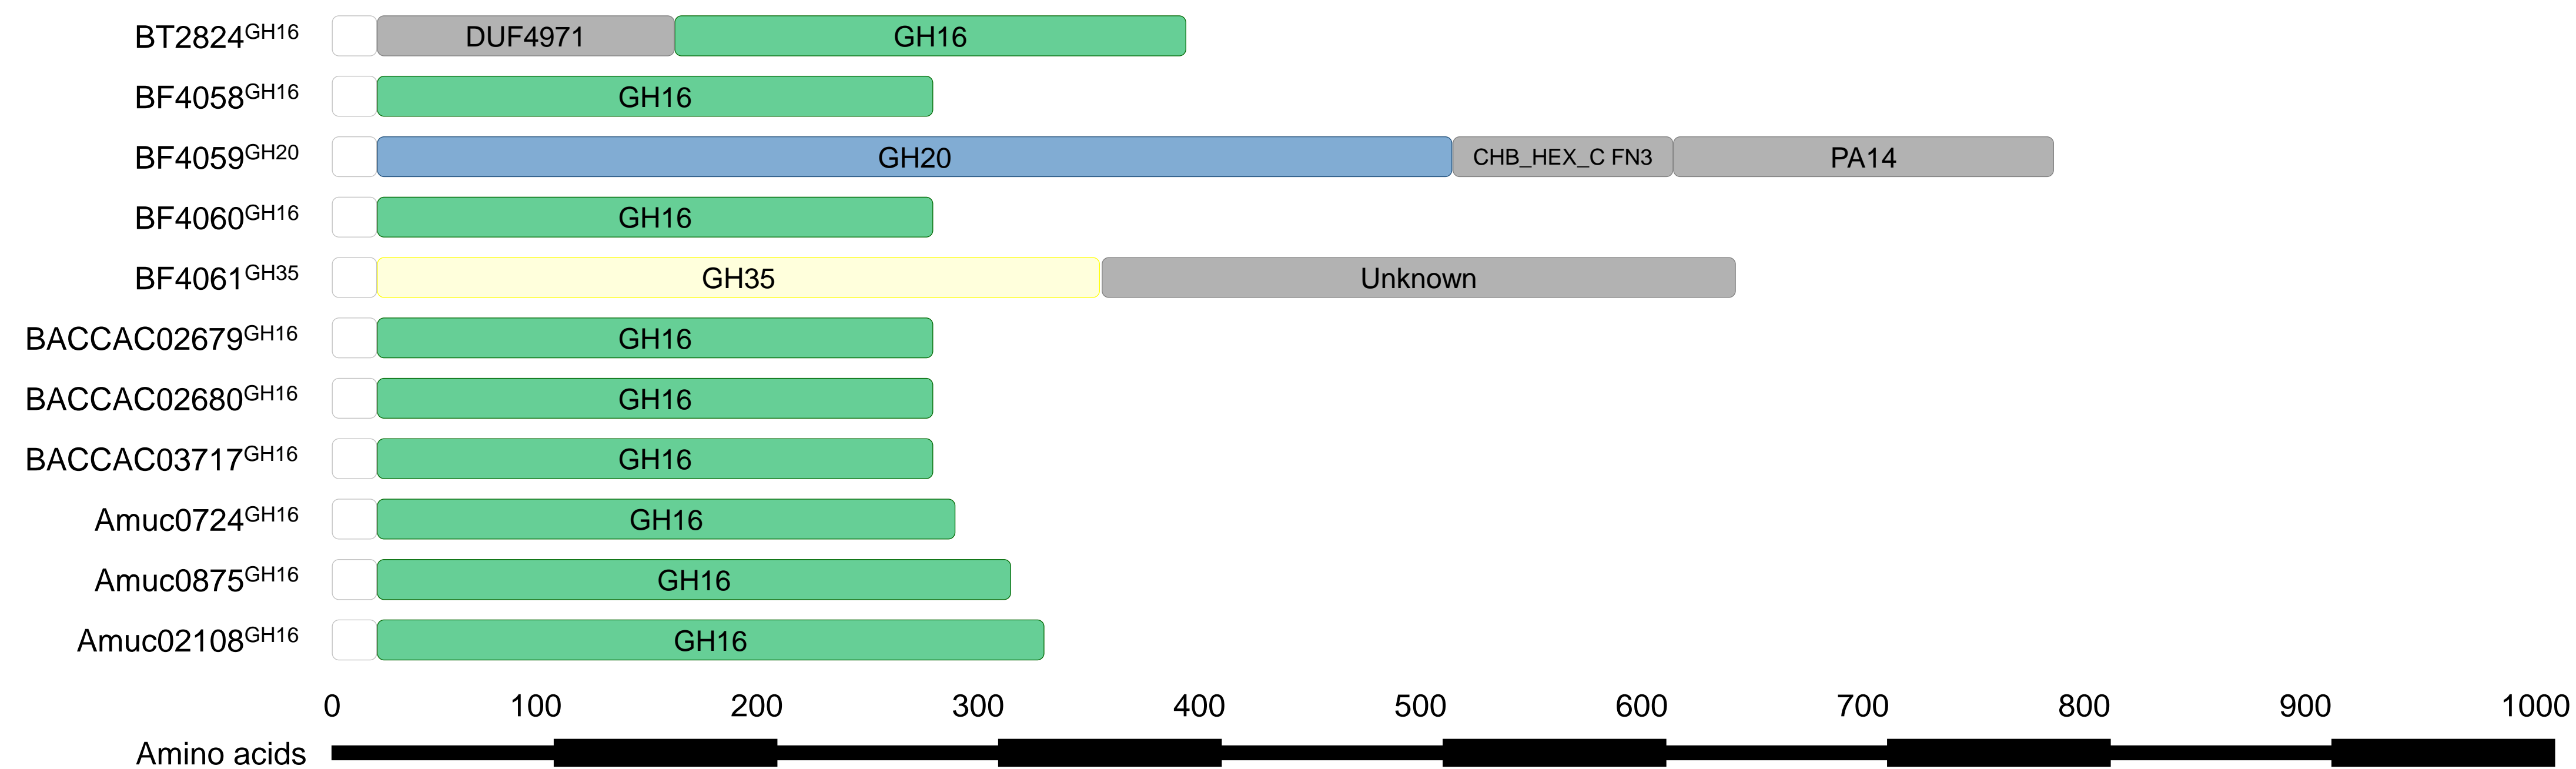

**Supplementary Figure 5 | Genomic context of the O-glycanase GH16 genes from different *Bacteroides* species and the predicted protein domains of the CAZymes explored.** **a**, The GH16 enzymes upregulated on mucin were used to search for homologues in other *Bacteroides* spp. (see Materials and Methods). The GH16 enzymes upregulated on O-glycans are highlighted with a blue glow. The lines connect the homologues. GH and other protein families are colour-coded: GH20 (blue), GH35 (yellow), GH18 (purple), GH3 (pink) and SusC/D-like pairs (grey). Abbreviations include: MFS - major facilitator superfamily. **b**, The domain structure and approximate lengths, which were determined as described in Materials and Methods. The white boxes at the start indicate the signal sequence of the protein.

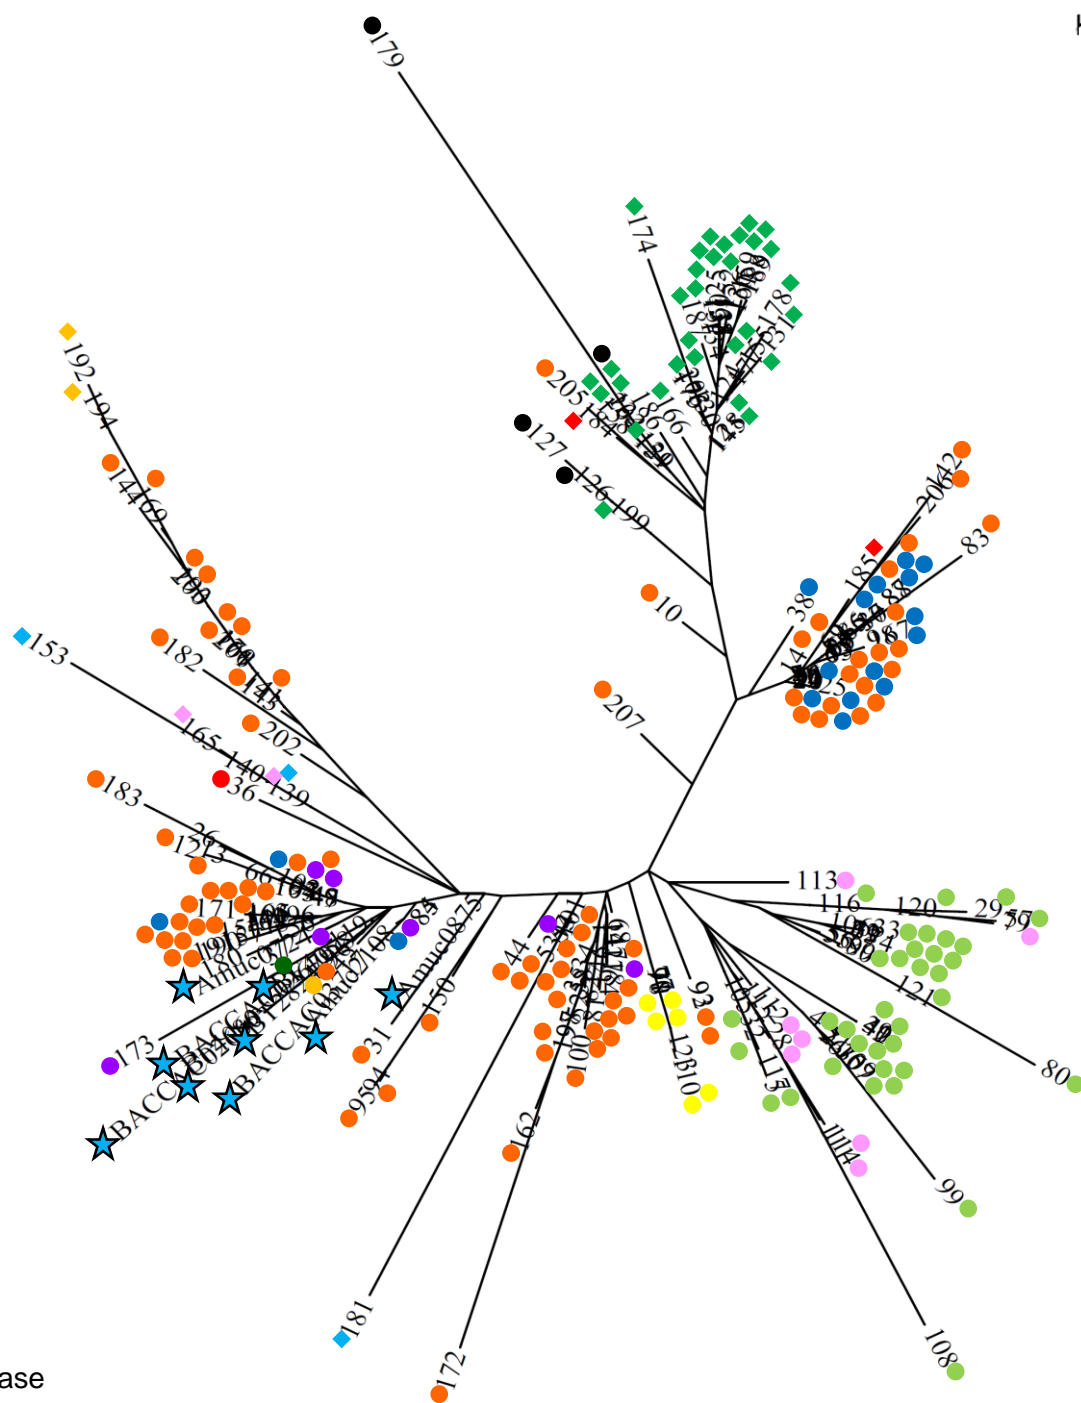

- Glucanase
- Lichanase
- Xyloglucanase
- ◆ Xyloglucan endotransferase
- Agarase
- Porphyranase
- GlcNAc-α1,4-Gal releasing B-galactosidase
- K-Carrageenase
- ◆ Endo-B1,3-galactanase
- Keratan sulfate
- Laminarinase
- Exo-β1,3-galactanase
- ◆ Chitin β-glucanosyltransferase
- ◆ Hyaluronidase

**Supplementary Figure 6 | Phylogenetic tree of characterised GH16 family members.** The sequences of GH16 family members with reported activities (CAZy database) and the O-glycan active family members characterised in this report (blue stars) were compared as described in Materials and Methods. Each CAZy data base entry was given a number to simplify the tree. Sub-activities can be seen branching off together in many instances.

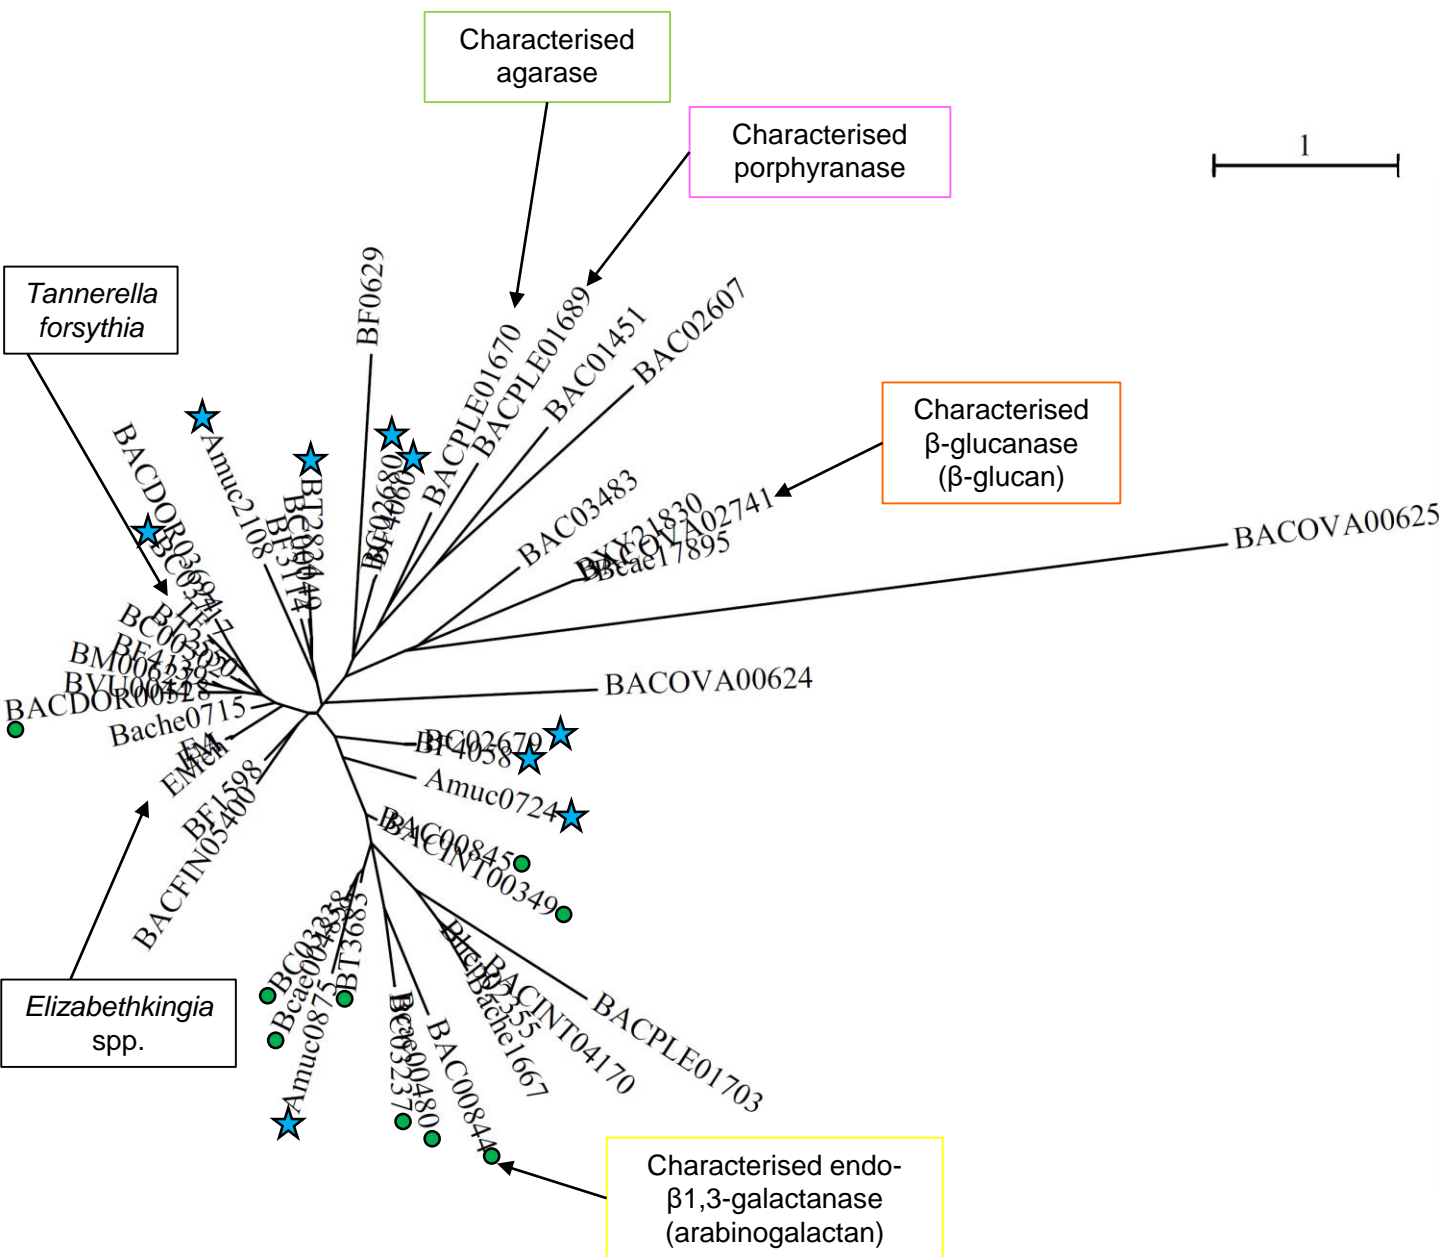

**Supplementary Figure 7 | Phylogenetic tree of a selection of characterised and uncharacterised GH16 family members.** 47 characterised and uncharacterised GH16 family members were selected from 14 mutualistic *Bacteroides* spp., *A. muciniphila* and 4 pathogens from the Bacteroidetes phylum. A key to the abbreviations of the locus tags is provided in Supplementary Table X. The pathogens include *Tannerella forsythia* and the *Elizabethkingia* species *E. meningoseptica*, *E. miricola* and *E. anophelis*. The O-glycan active GH16 family members described in this report are indicated by a blue star. The characterised GH16 family members include a  $\beta$ -glucanase involved in degrading mixed-linkage  $\beta$ -glucan from *B. ovatus* (Tamura *et al.* 2017), a porphyranase and agarose from *B. plebius* (Heheman *et al.* 2012) and a  $\beta$ 1,3-galactanase from *B. cellulosilyticus* involved in the degradation of arabinogalactan (Cartmell *et al.* 2018). Those GH16 enzymes that are in PULs with a similar gene composition to the characterised arabinogalactan GH16 from *B. cellulosilyticus* are highlighted by a green dot.

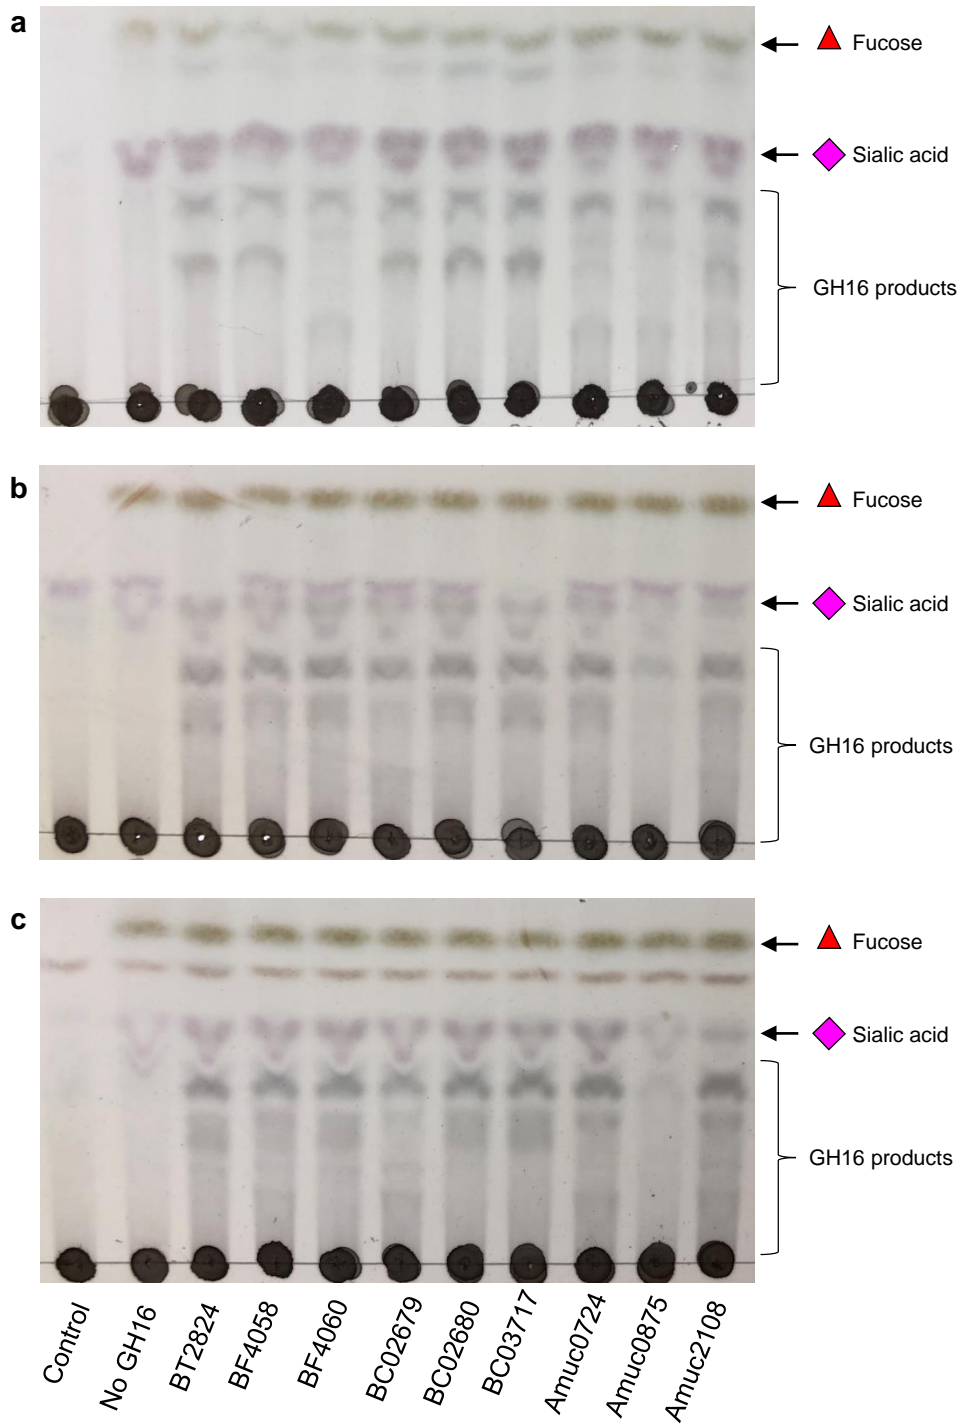

**Supplementary Figure 8 | Activity of the GH16 enzymes against porcine small intestinal mucin and commercially available Porcine gastric mucin a, Porcine small intestinal mucin. b, PGM type II. c, PGM type III. All assays with a GH16 enzyme also included a sialidase and  $\alpha$ 1,2-fucosidase, BT0455<sup>GH33</sup> and a GH95 (from *Bifidobacterium bifidum*; see Supplementary Fig. 9).**

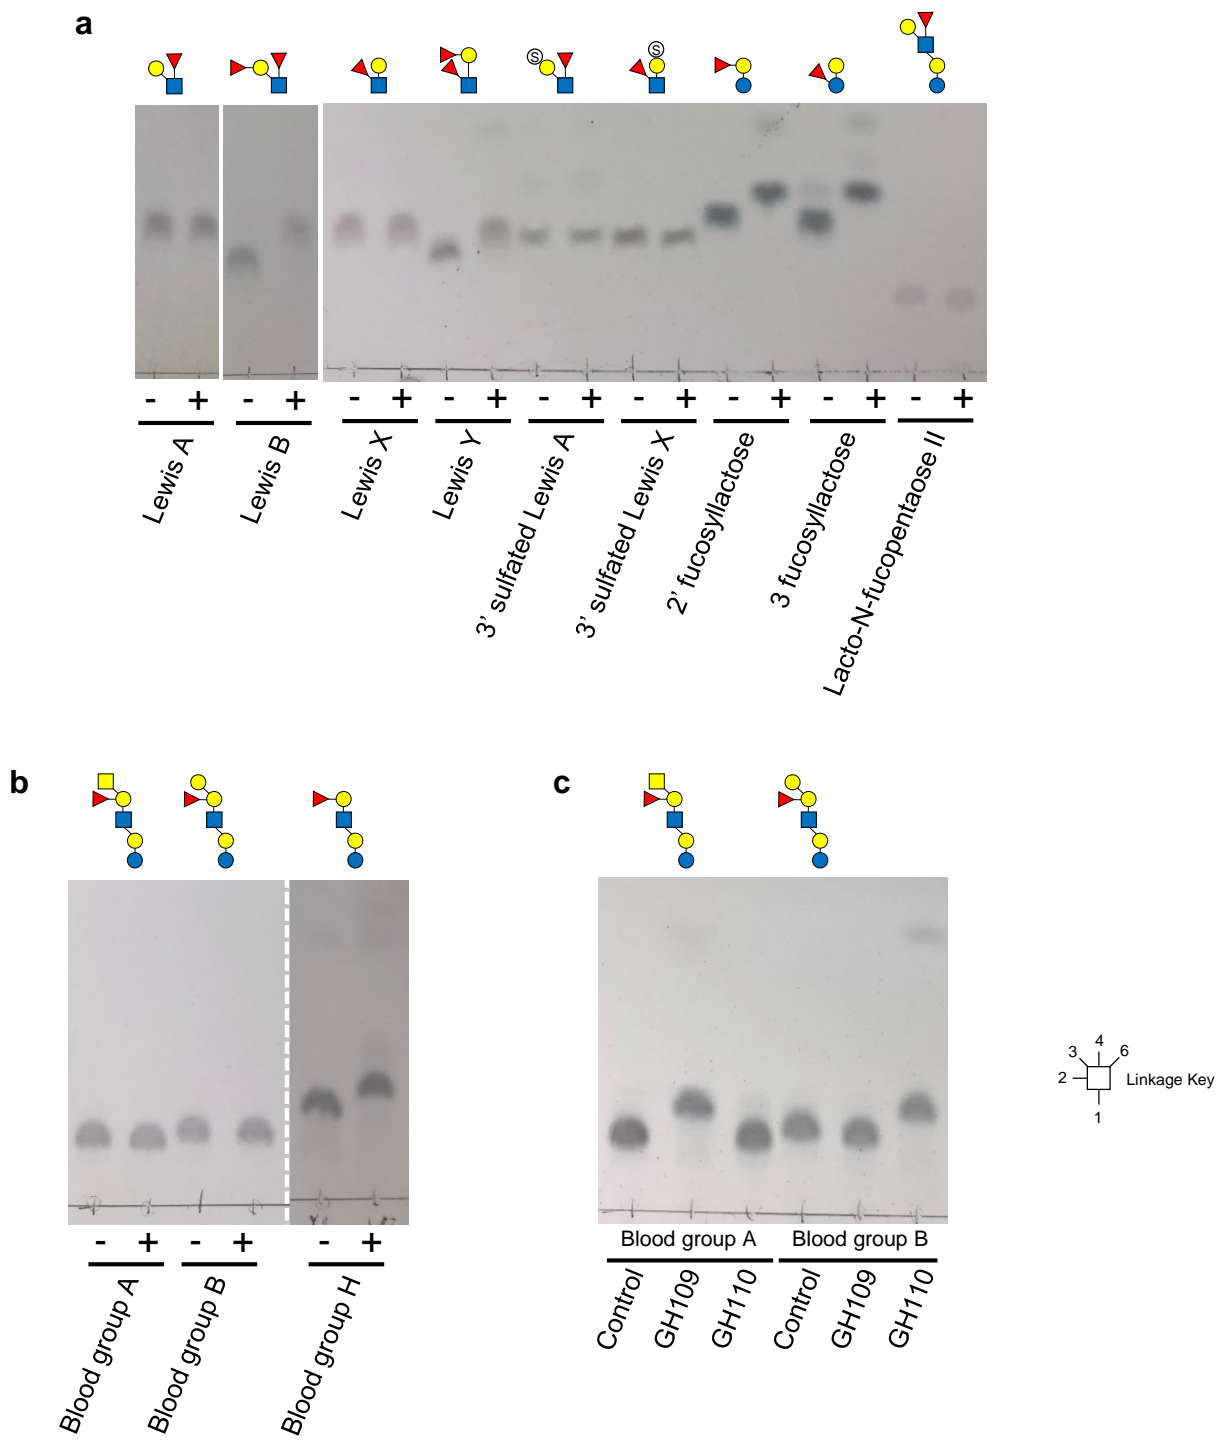

**Supplementary Figure 9 | Activity of exo-acting enzymes against di- and oligo-saccharides a**, GH95  $\alpha$ -fucosidase from *Bifidobacterium bifidum* **b**, GH95  $\alpha$ -1,2-fucosidase from *Bifidobacterium bifidum* against blood group sugars. Activity can only be seen after removal of the  $\alpha$ -linked GalNAc or Gal (blood group H). **c**, Activity of a GH109  $\alpha$ -GalNAc'ase and GH110  $\alpha$ -galactosidase against different blood group structures.

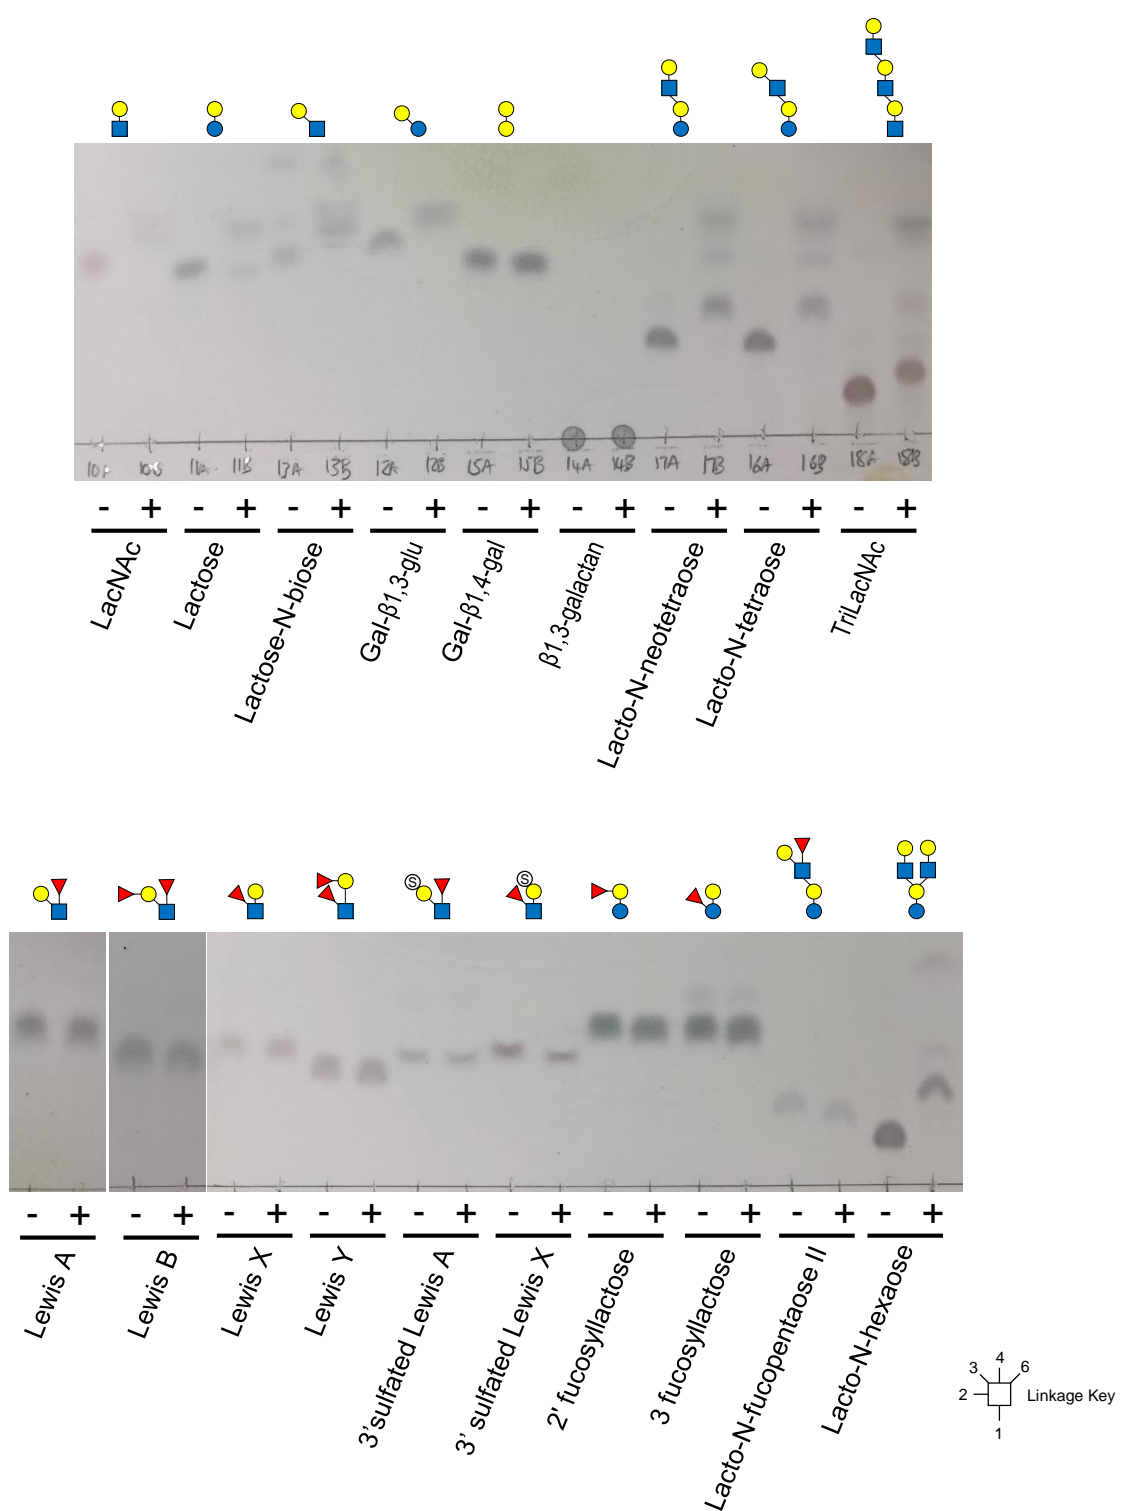

### Supplementary Figure 10 | Activity of galactosidase BF4061<sup>GH35</sup> di- and oligosaccharides

The polysaccharide utilisation loci in *Bacteroides fragilis* encoding the O-glycan active GH16 enzymes also encodes a putative GH35. The recombinant form was incubated with a variety of glycans to determine specificity.

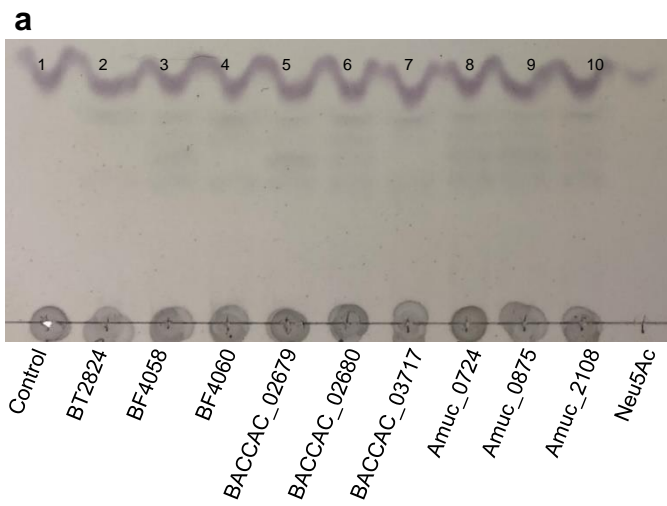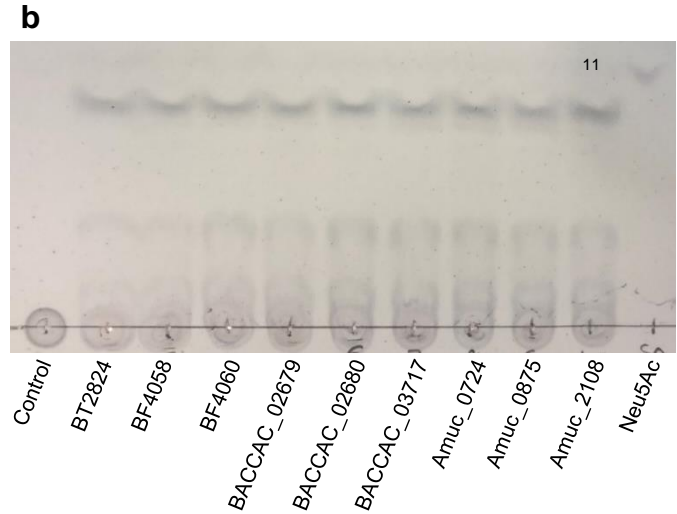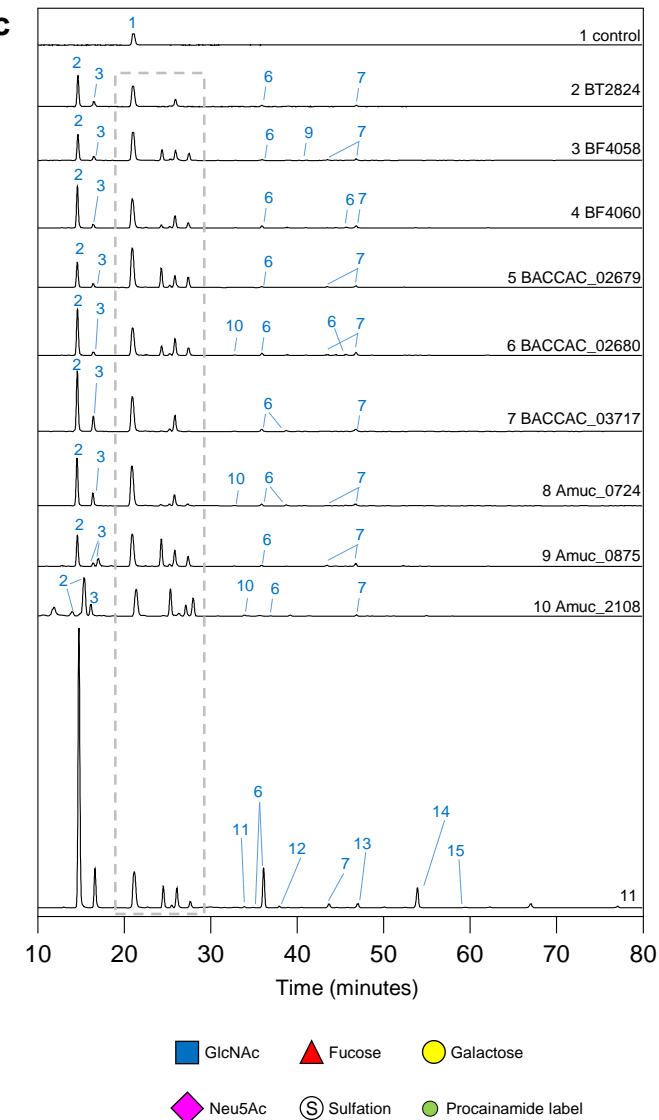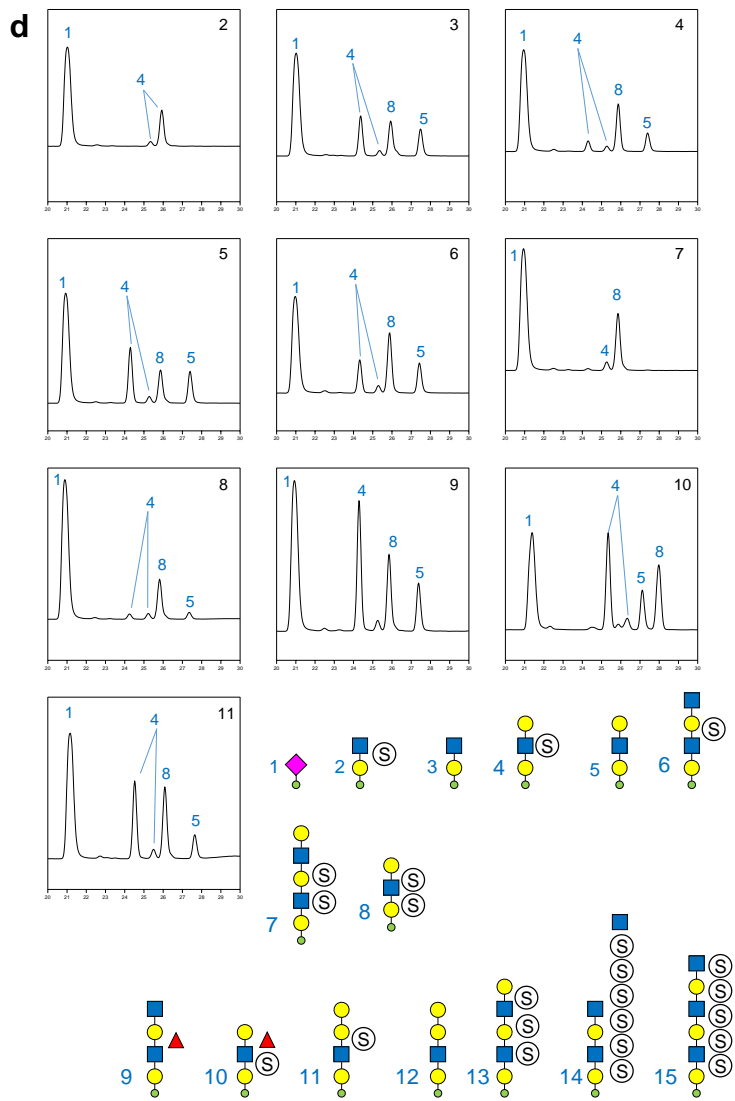

**Supplementary Figure 11 | Products produced by O-glycan active GH16 family members on keratan a, TLC of activity against N-linked egg keratan. b, TLC of activity against N-linked bovine cornea keratan. c, Chromatograms of procaïnamide-labelled keratan products, where the number correspond to those in a and b. The grey dotted box indicated the areas which are magnified in d. d, Magnifications of the chromatograms between 20-30 minutes to allow clearer annotation of the products. All assays also included the broad-acting sialidase BT0455<sup>GH33</sup>. The composition and structure of the products are shown.**

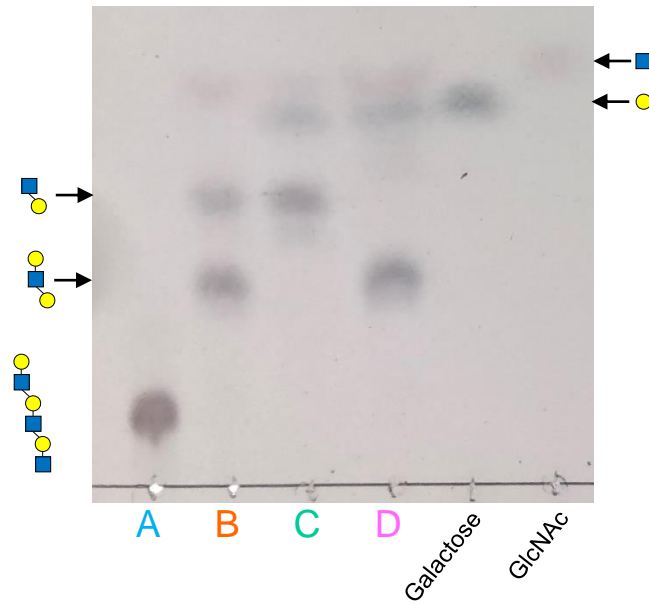

- A. Control
- B. Amuc\_0724<sup>GH16</sup>
- C. Amuc\_0724<sup>GH16</sup> post-treated with  $\beta$ 1,4-galactosidase (BT0461<sup>GH2</sup>)
- D. Amuc\_0724<sup>GH16</sup> post-treated with broad-acting GlcNAc'ase (BT0459<sup>GH20</sup>)

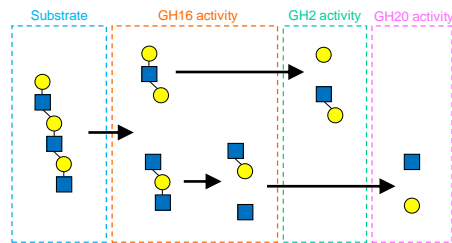

**Supplementary Figure 12 | Activity of Amuc\_0724<sup>GH16</sup> against triLacNAc** The products of triLacNAc digestion by Amuc\_0724<sup>GH16</sup> (lane B) were incubated with either a  $\beta$ 1,4-galactosidase (lane C) or an  $\beta$ -GlcNAc'ase (lane D) to confirm their identity.



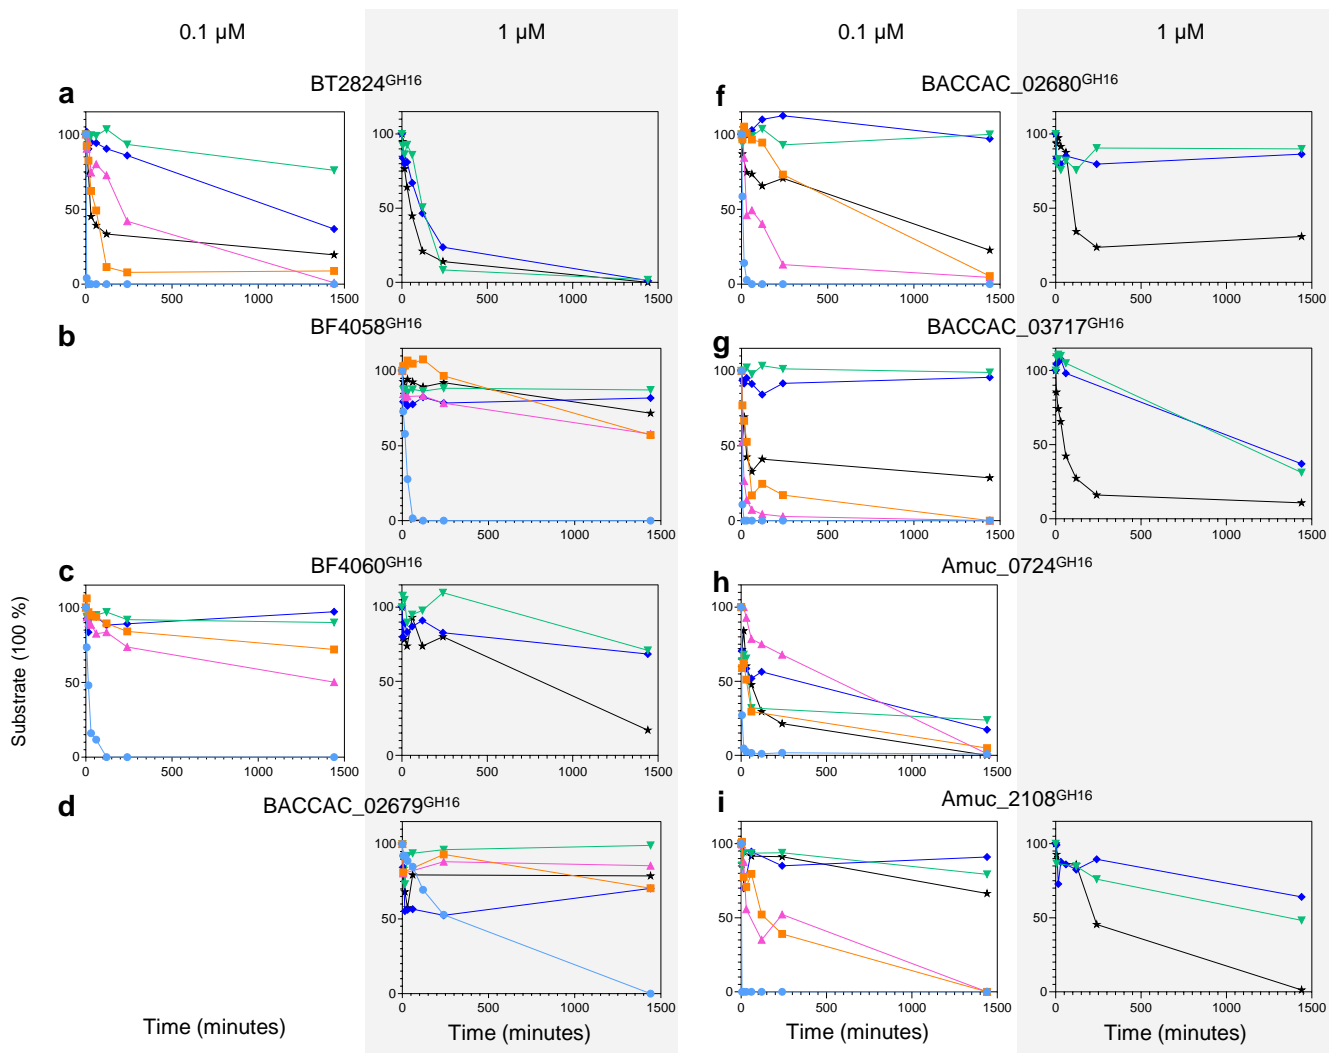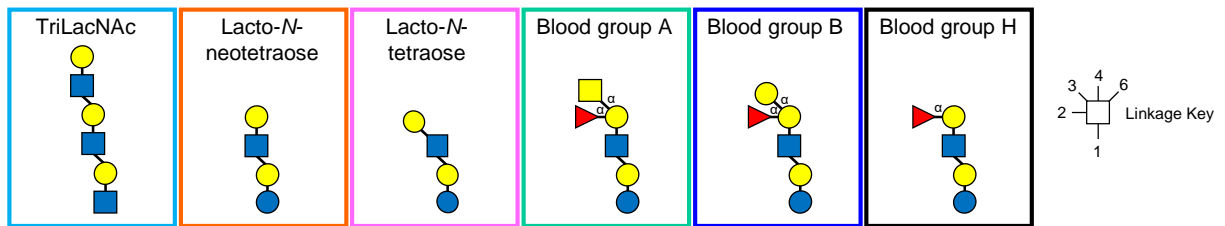

**Supplementary Figure 13 | Substrate depletion assays with defined oligosaccharides to probe the importance of the different sub-sites of the GH16 enzymes** Assays were carried out with 1 mM substrate concentration and samples taken at different time points to monitor substrate depletion by HPAEC-PAD. Enzyme concentration was 0.1  $\mu\text{M}$  (white columns) or 1  $\mu\text{M}$  (grey columns). The defined oligosaccharides used were TriLacNAc (light blue circles), Lacto-*N*-neotetraose (orange squares), Lacto-*N*-tetraose (pink triangles), blood group A (green inverted triangles), blood group B (dark blue diamonds) and blood group H (black stars). **a**, BT2824<sup>GH16</sup>. **b**, BF4058<sup>GH16</sup>. **c**, BF4060<sup>GH16</sup>. **d**, BACCAC\_02679<sup>GH16</sup>. **e**, BACCAC\_02680<sup>GH16</sup>. **f**, BACCAC\_03717<sup>GH16</sup>. **g**, Amuc\_0724<sup>GH16</sup>. **h**, Amuc\_0875<sup>GH16</sup>. **i**, Amuc\_2108<sup>GH16</sup>.

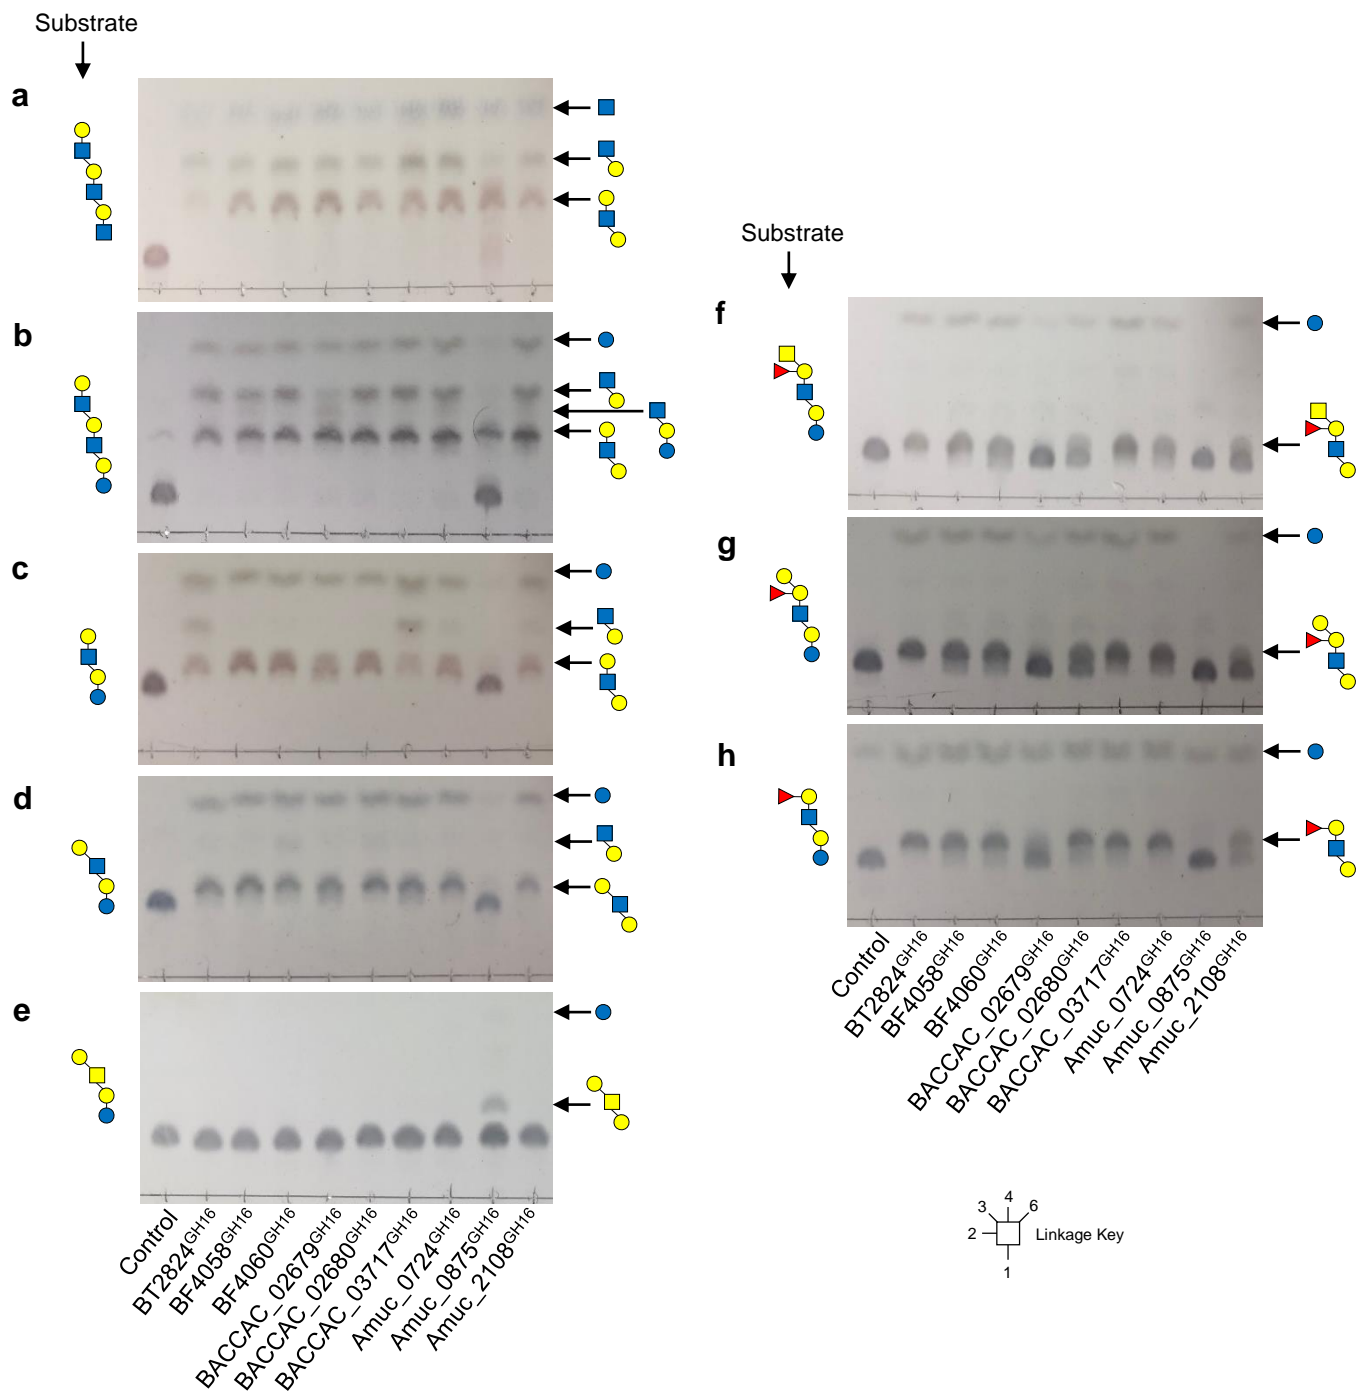

**Supplementary Figure 14 | Activity of the GH16 enzymes against defined oligosaccharides.** Products of GH16 activity were visualised by TLC. **a**, triLacNAc. **b**, paraLacto-N-neohexaose. **c**, Lacto-N-neotetraose. **d**, Lacto-N-tetraose. **e**, Gal $\beta$ 1,3GalNAc  $\beta$ 1,3Gal $\beta$ 1,4Glc. **f**, Blood group A hexasaccharide II. **g**, Blood group B hexasaccharide II. **h**, Blood group H pentasaccharide generated from A or B. Control = no enzyme added.

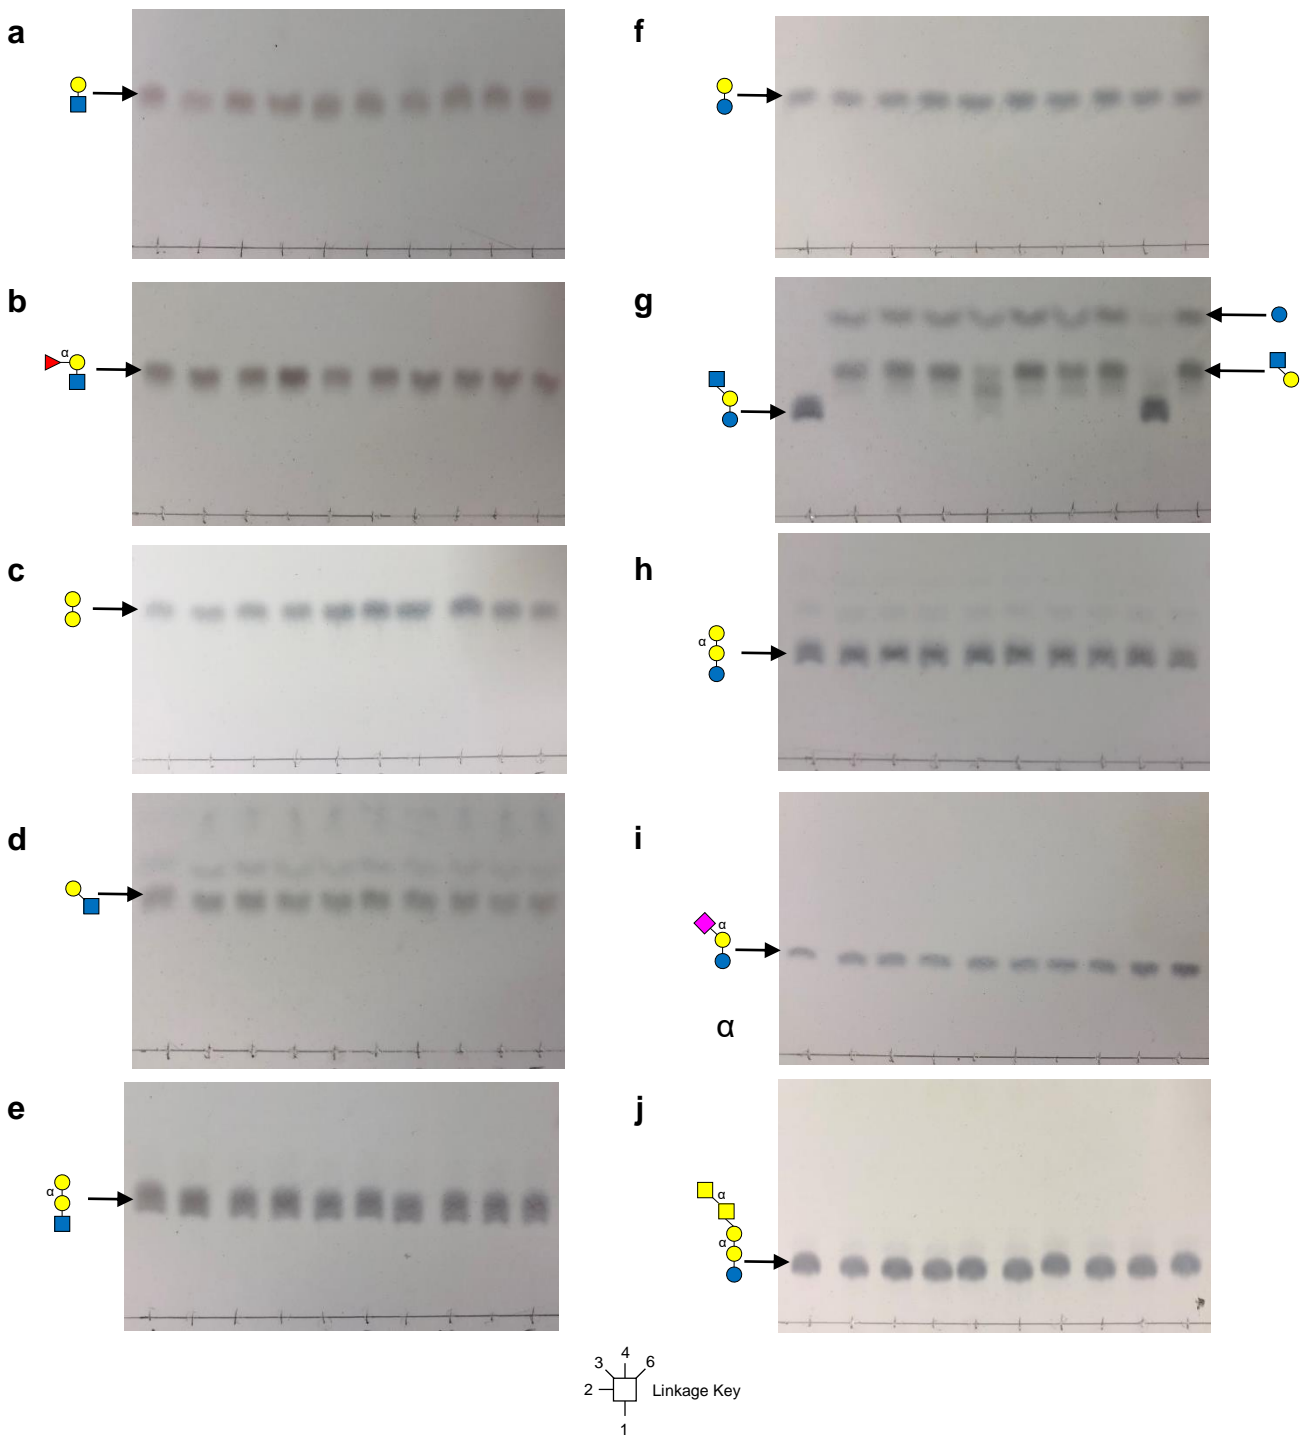

**Supplementary Figure 15 | Activity of the GH16 enzymes defined di- and oligo-saccharides.** Products of GH16 activity were visualised by TLC. **a**, LacNAc. **b**, Blood group H trisaccharide II. **c**, Gal $\beta$ 1,4Gal. **d**, Lacto-N-biose. **e**, P1 antigen. **f**, Lactose. **g**, Lacto-N-triose. **h**, Globotriose. **i**, 3-Sialyllactose. **j**, Forssman antigen.

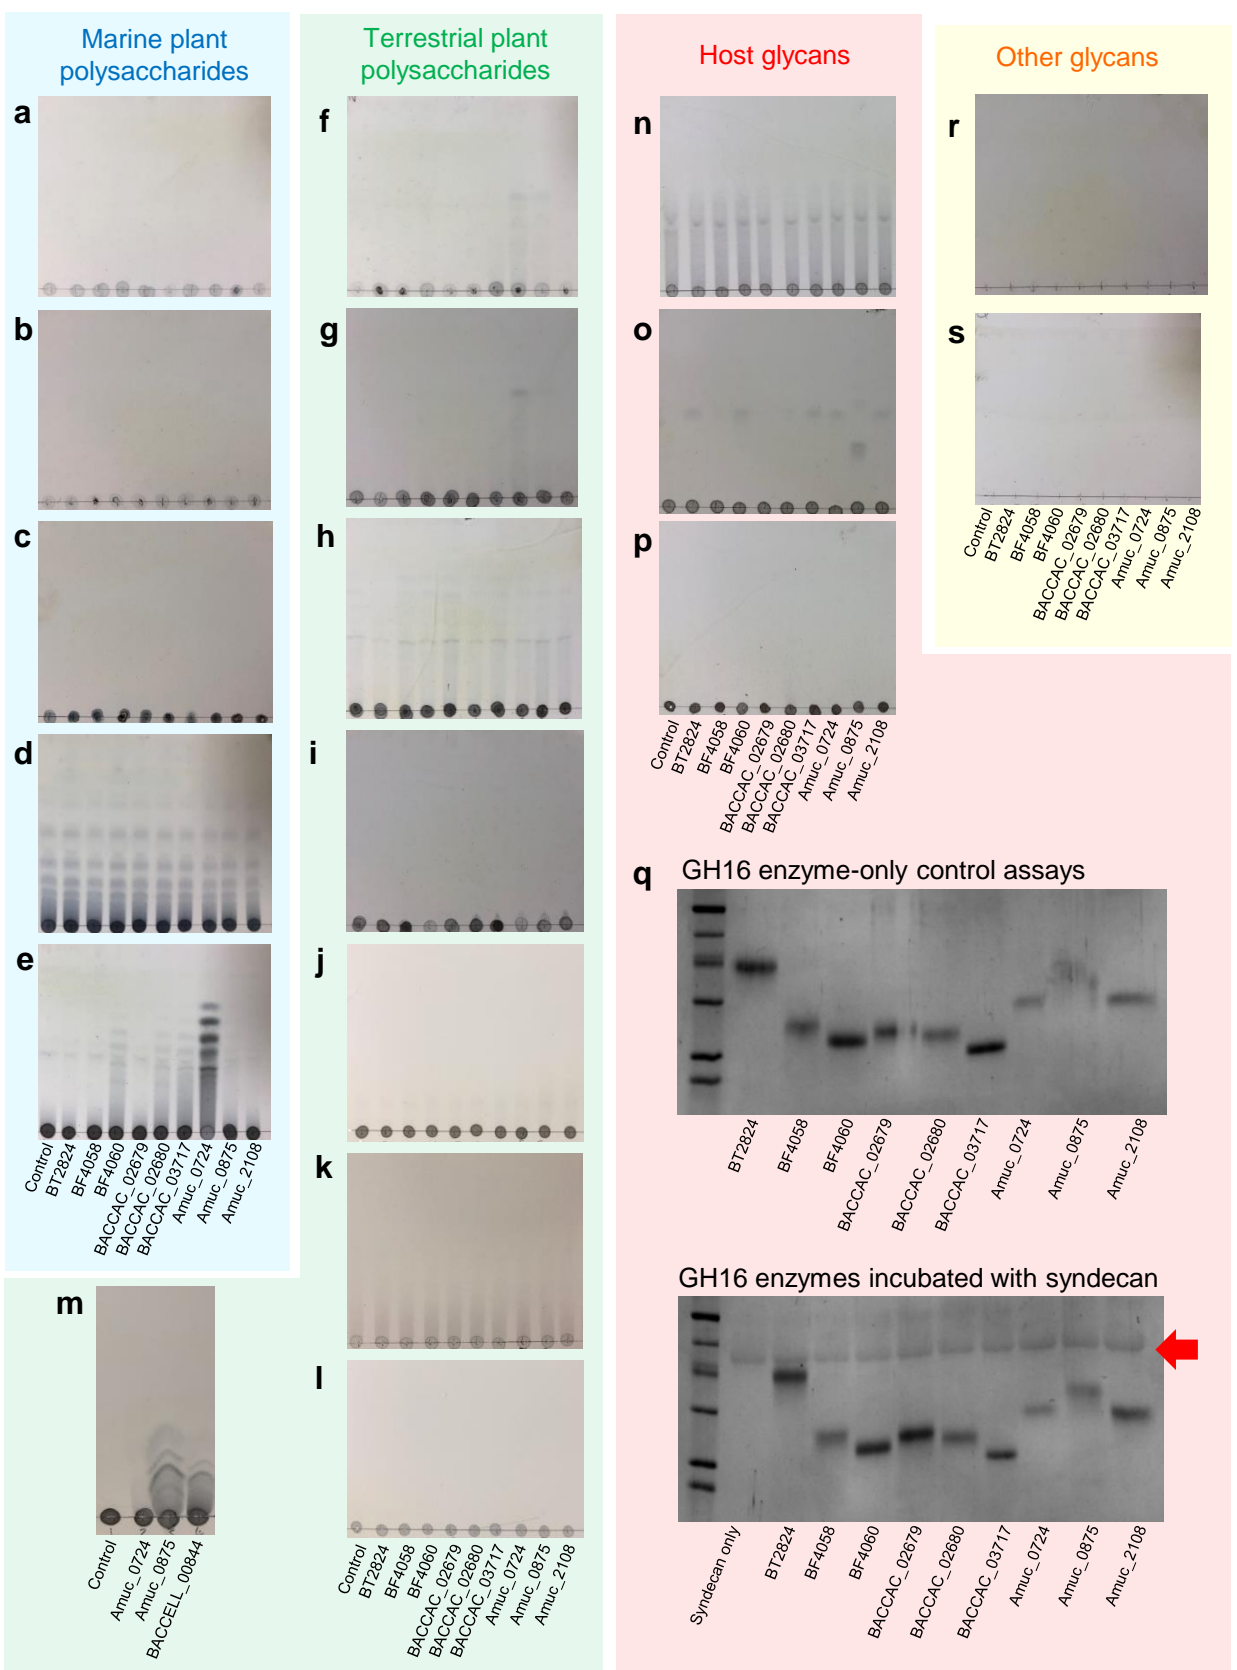

**Supplementary Figure 16 | Activity of the GH16 enzymes characterised in this work against polysaccharides already associated with the family** Activity of GH16 enzymes against substrates associated with this family. All assays were carried out with **a**, Agar. **b**, Agarose. **c**,  $\kappa$ -carrageenan. **d**, Porphyrin. **e**, Laminarin. **f**, Barley  $\beta$ -glucan. **g**, Lichenan. **h**, Pectic  $\beta$ 1,4-galactan. **i**, Xyloglucan. **j**, Larch arabinogalactan. **k**, Wheat arabinogalactan. **l**, Gum arabinogalactan. **m**,  $\beta$ 1,3-galactan **n**, Chondroitin sulfate. **o**, Heparan sulfate. **p**, Hyaluronic acid. **q**, Human syndecan. To assess if the GH16 enzymes could cleave heparan sulfate polysaccharides away from protein they were incubated with human syndecan (bottom gel). A control gel (top) shows GH16-only assays. The red arrow indicates where syndecan (50  $\mu$ g) runs on the gel and shows that it does not decrease in mass with the addition of GH16. **r**, Shrimp chitin. **s**, Squid chitin. All reactions were carried out in phosphate buffer at pH 7 overnight with 3  $\mu$ m enzyme.

**a** BACCAC02680<sup>GH16</sup>

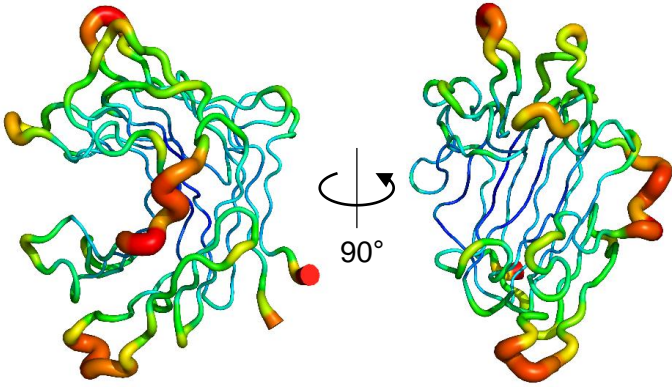

**b** BF4060<sup>GH16</sup>

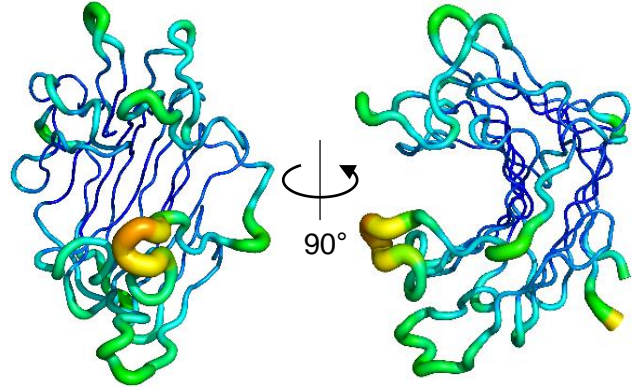

**c** BACCAC03717<sup>GH16</sup>

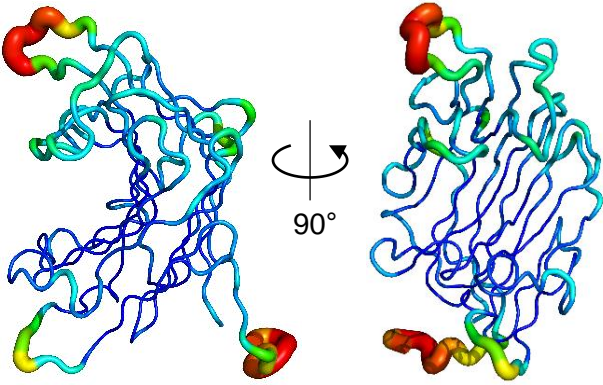

**d** Amuc0724<sup>GH16</sup>

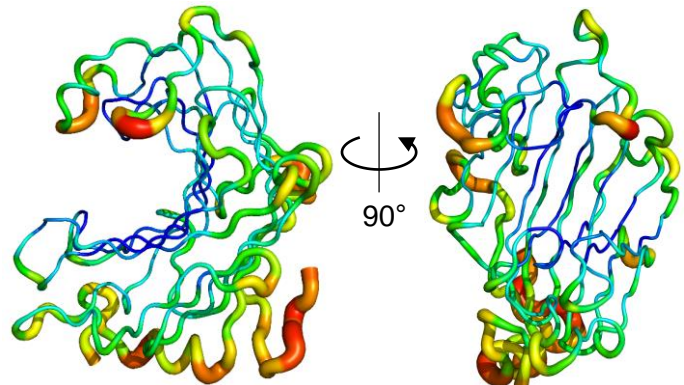

**Supplementary Figure 17 | B factor putty projections of the O-glycan active GH16 crystal structures obtained in this study. a, Baccac\_02680<sup>GH16E143Q</sup>. b, BF4060<sup>GH16</sup>. c, Baccac\_03717<sup>GH16</sup>. d, Amuc\_0724<sup>GH16</sup>.**

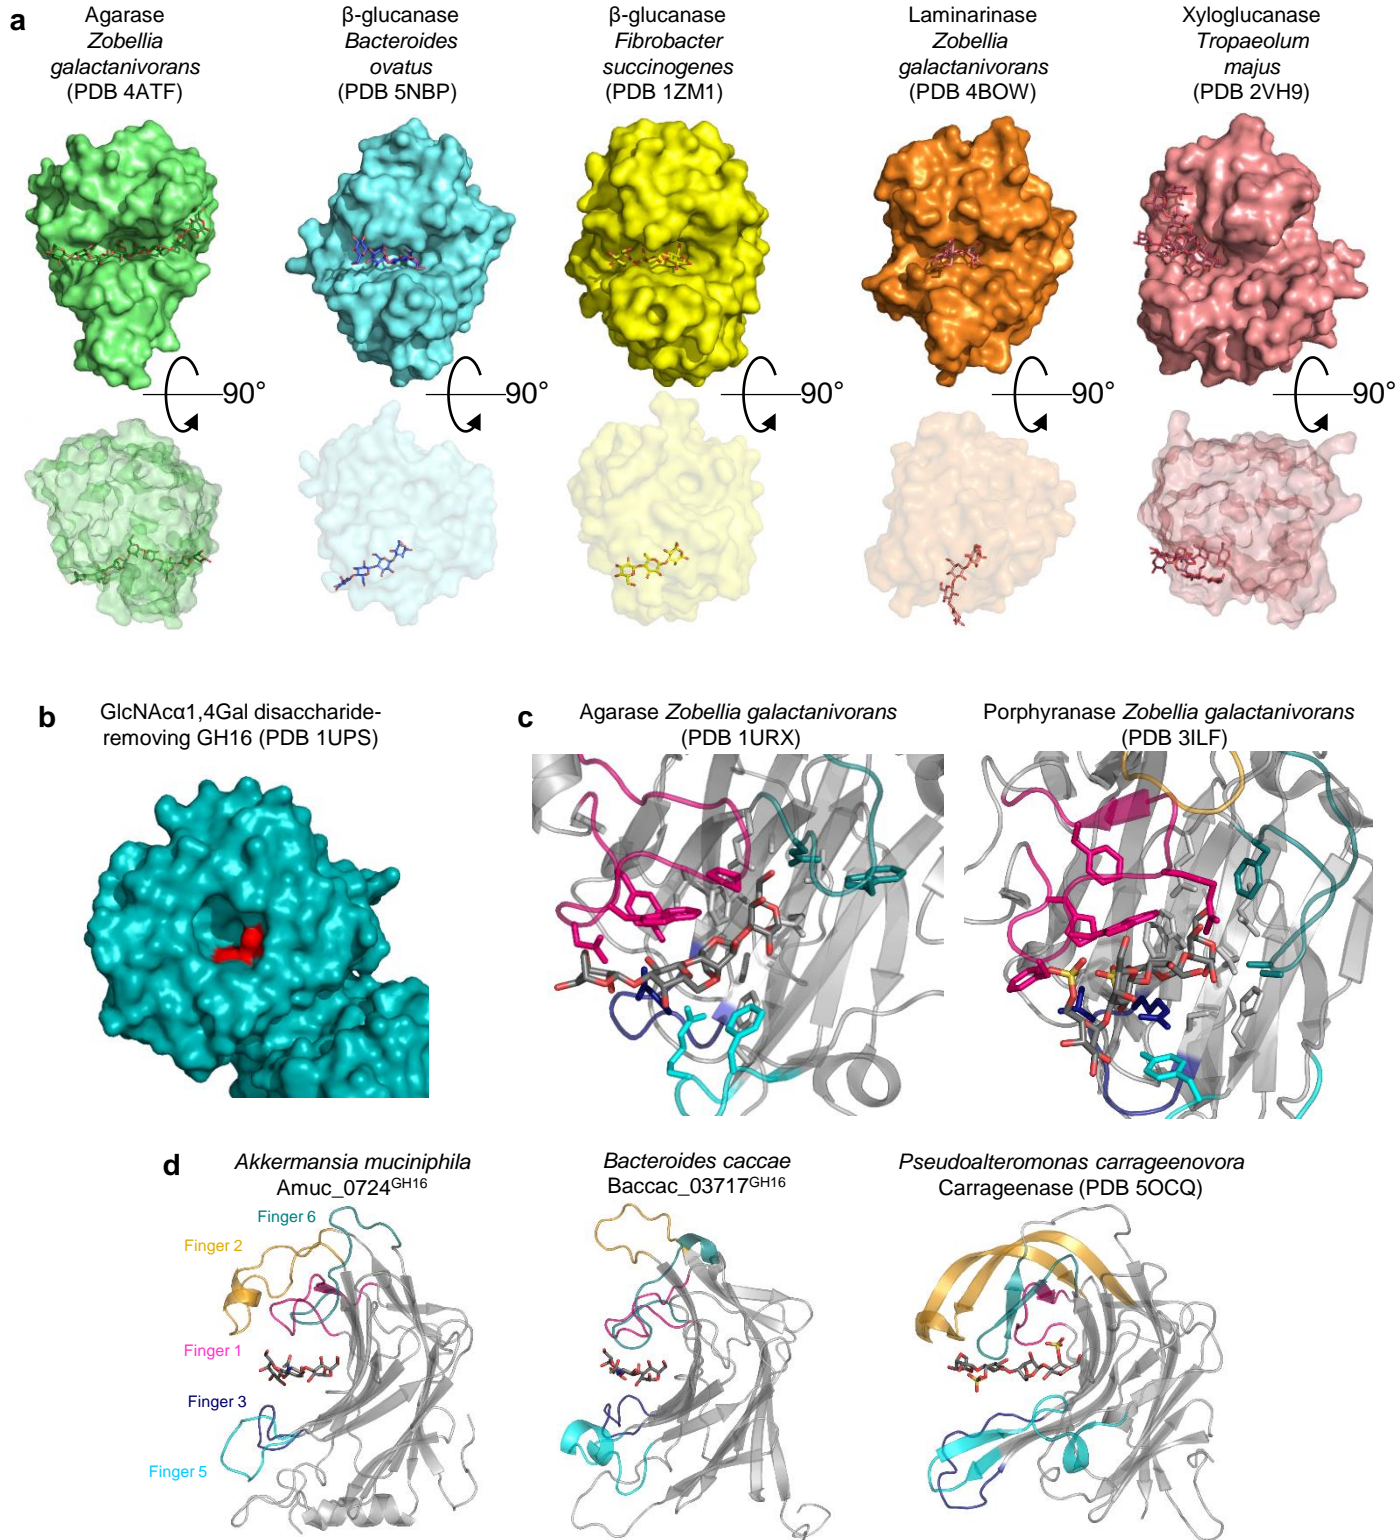

**Supplementary Fig. 18 | Crystal structures differences within the GH16 family members** **a**, Crystal structures of a number of different GH16 family members to exemplify their variation in terms of cleft structure and orientation of substrate (Heheman *et al.* 2012, Tamura *et al.* 2017, Tsai *et al.* 2005, Labourel *et al.* 2014 and Mark *et al.* 2009). **b**, The substrate binding site of *Clostridium perfringens* GH16 family member that removes GlcNAc $\alpha$ 1,4Gal disaccharide from stomach O-glycans. This pocket-like binding site is a unique example amongst the GH16 family structures so far. Catalytic residues are shown in red (Tempel *et al.* 2005). **c**, The active sites of two GH16 enzymes with activity towards marine plant polysaccharides. This demonstrates the differences in the negative subsites to GH16  $\beta$ -glucanases. Both types of enzyme select for a  $\beta$ 1,3 linkage between the -1 and -2 subsite, but the structural reasons driving this are different. **d**, Side views of Amuc\_0724<sup>GH16</sup>, BACCAC\_03717<sup>GH16</sup> and a carrageenase (Matard-Mann *et al.* 2017) to demonstrate the different types of finger two (yellow) and their interactions with sugars occupying the -3 and -4 subsites.

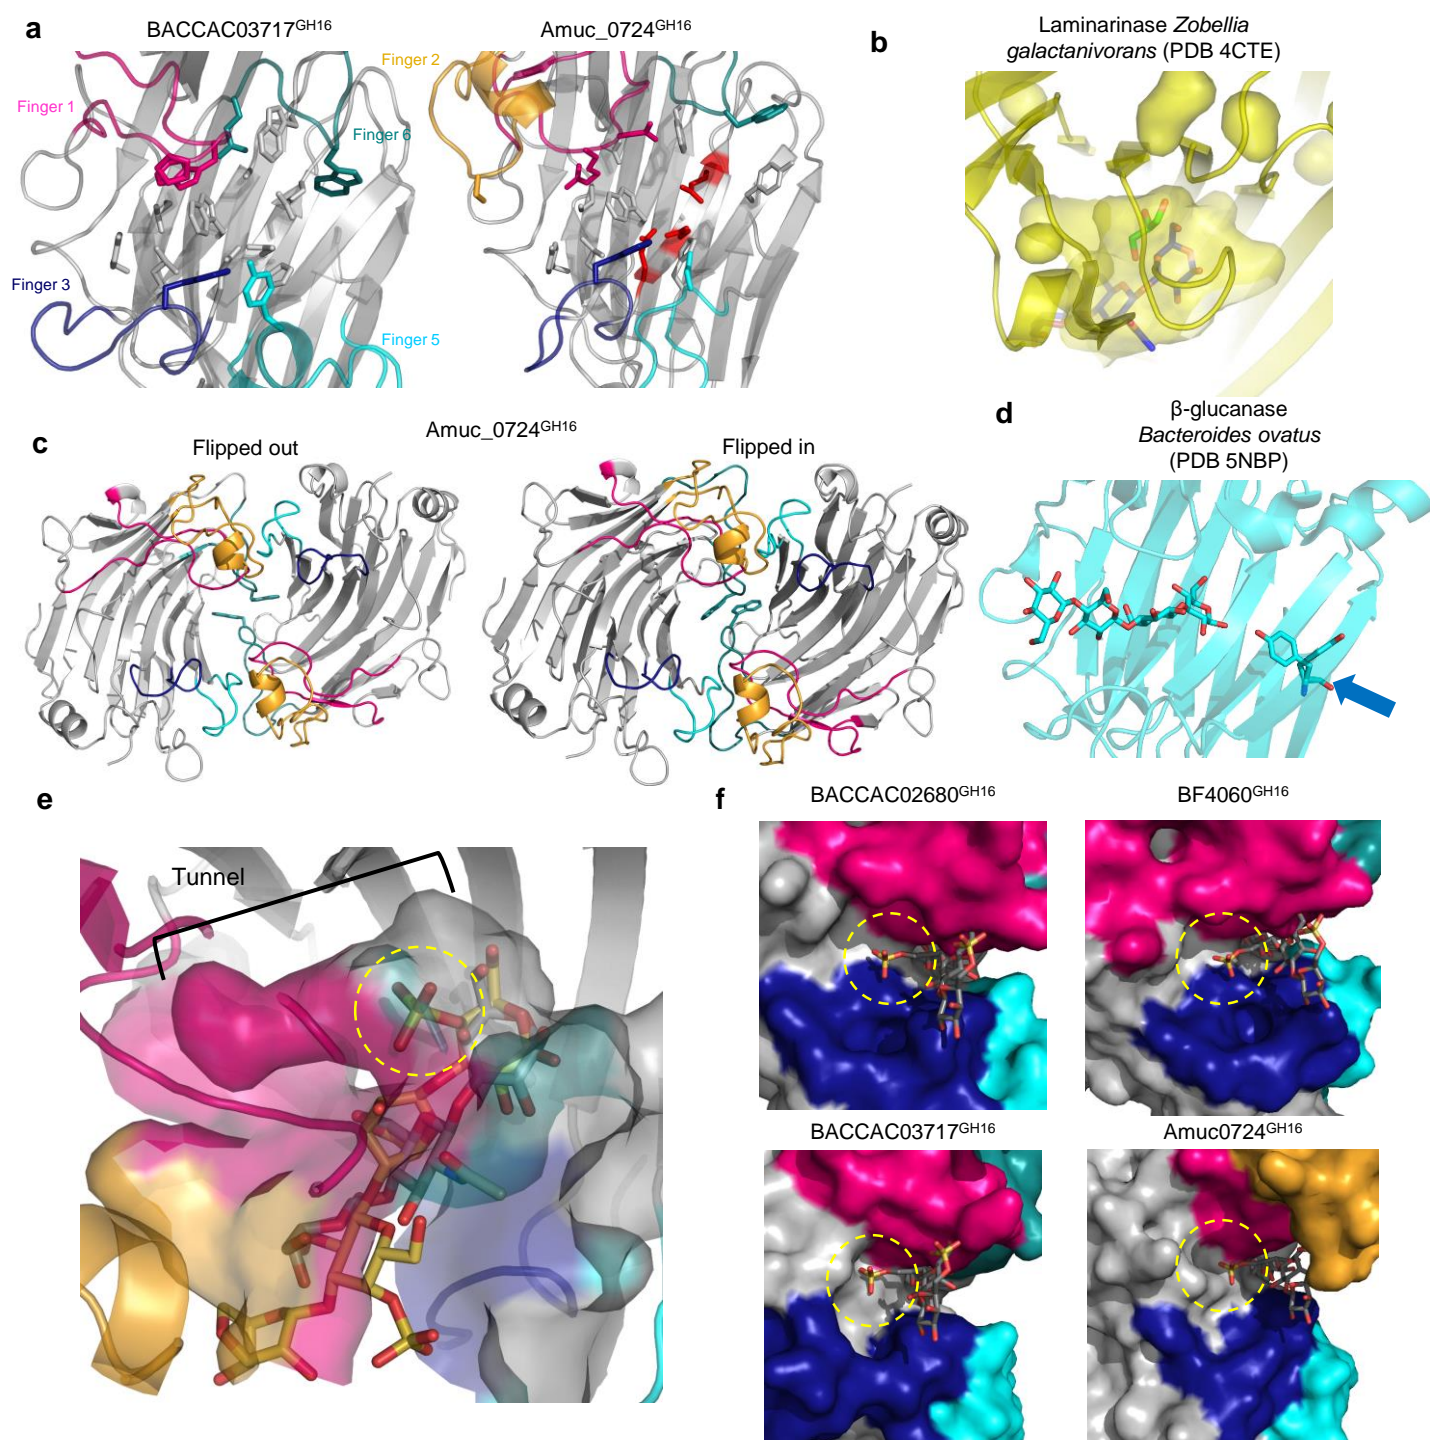

**Supplementary Fig. 19 | Crystal structures comparisons within the GH16 family members a**, The detailed view of the active sites of Baccac\_03717<sup>GH16</sup>, and Amuc\_0724<sup>GH16</sup>. The fingers are colour coded. **b**, A surface representation of the cavities and pockets around the -1 subsite of a laminarinase (Labourel *et al.* 2015). A glycerol was crystallised within the pocket adjoining the -1 subsite and the product from Baccac\_02680<sup>GH16E143Q</sup> is overlaid to show the -1 subsite. The presence of the glycerol, suggested that branching sugars may be accommodated at this position. **c**, The two different occupancies possible for W279 in Amuc\_0724<sup>GH16</sup> in the unit cell to show the interactions between the two molecules. The tyrosines are shown as sticks and come from finger 6 (teal). The flipped-out version may represent a crystallographic artefact rather than a biologically relevant observation. **d**, An example of a dynamic tyrosine (blue arrow) also observed in the positive subsites of a crystal structure of a  $\beta$ -glucanase GH16 family members from *B. ovatus*. **e**, A surface representation of the pockets and cavities around the negative subsites of the Amuc\_0724<sup>GH16</sup> crystal structure. The different colours represent the different fingers of the enzyme. The trisaccharide product from Baccac\_02680<sup>GH16E143Q</sup> is overlaid to the structure (grey) as well as the carrageenan product (yellow) from a  $\kappa$ -carrageenases from *Pseudoalteromonas carrageenovora* (PDB 5OCQ; Matar-Mann *et al.* 2017) to show how a sulfate could be accommodated in the tunnel of Amuc\_0724<sup>GH16</sup> (yellow dashed circle). Accommodation of this sulfate group would not be possible with the O-glycan active GH16 enzymes from *Bacteroides* spp. **f**, The four O-glycan active GH16 enzymes from this study are overlaid with the porphyrane product originally crystallised with a porphyranase from *Zobellia galactanivorans* (PDB 3ILF; Heheman *et al.* 2010). This demonstrates how a sulfate group could be accommodated in the cleft at the -2 subsite of these enzymes (yellow dashed circle).

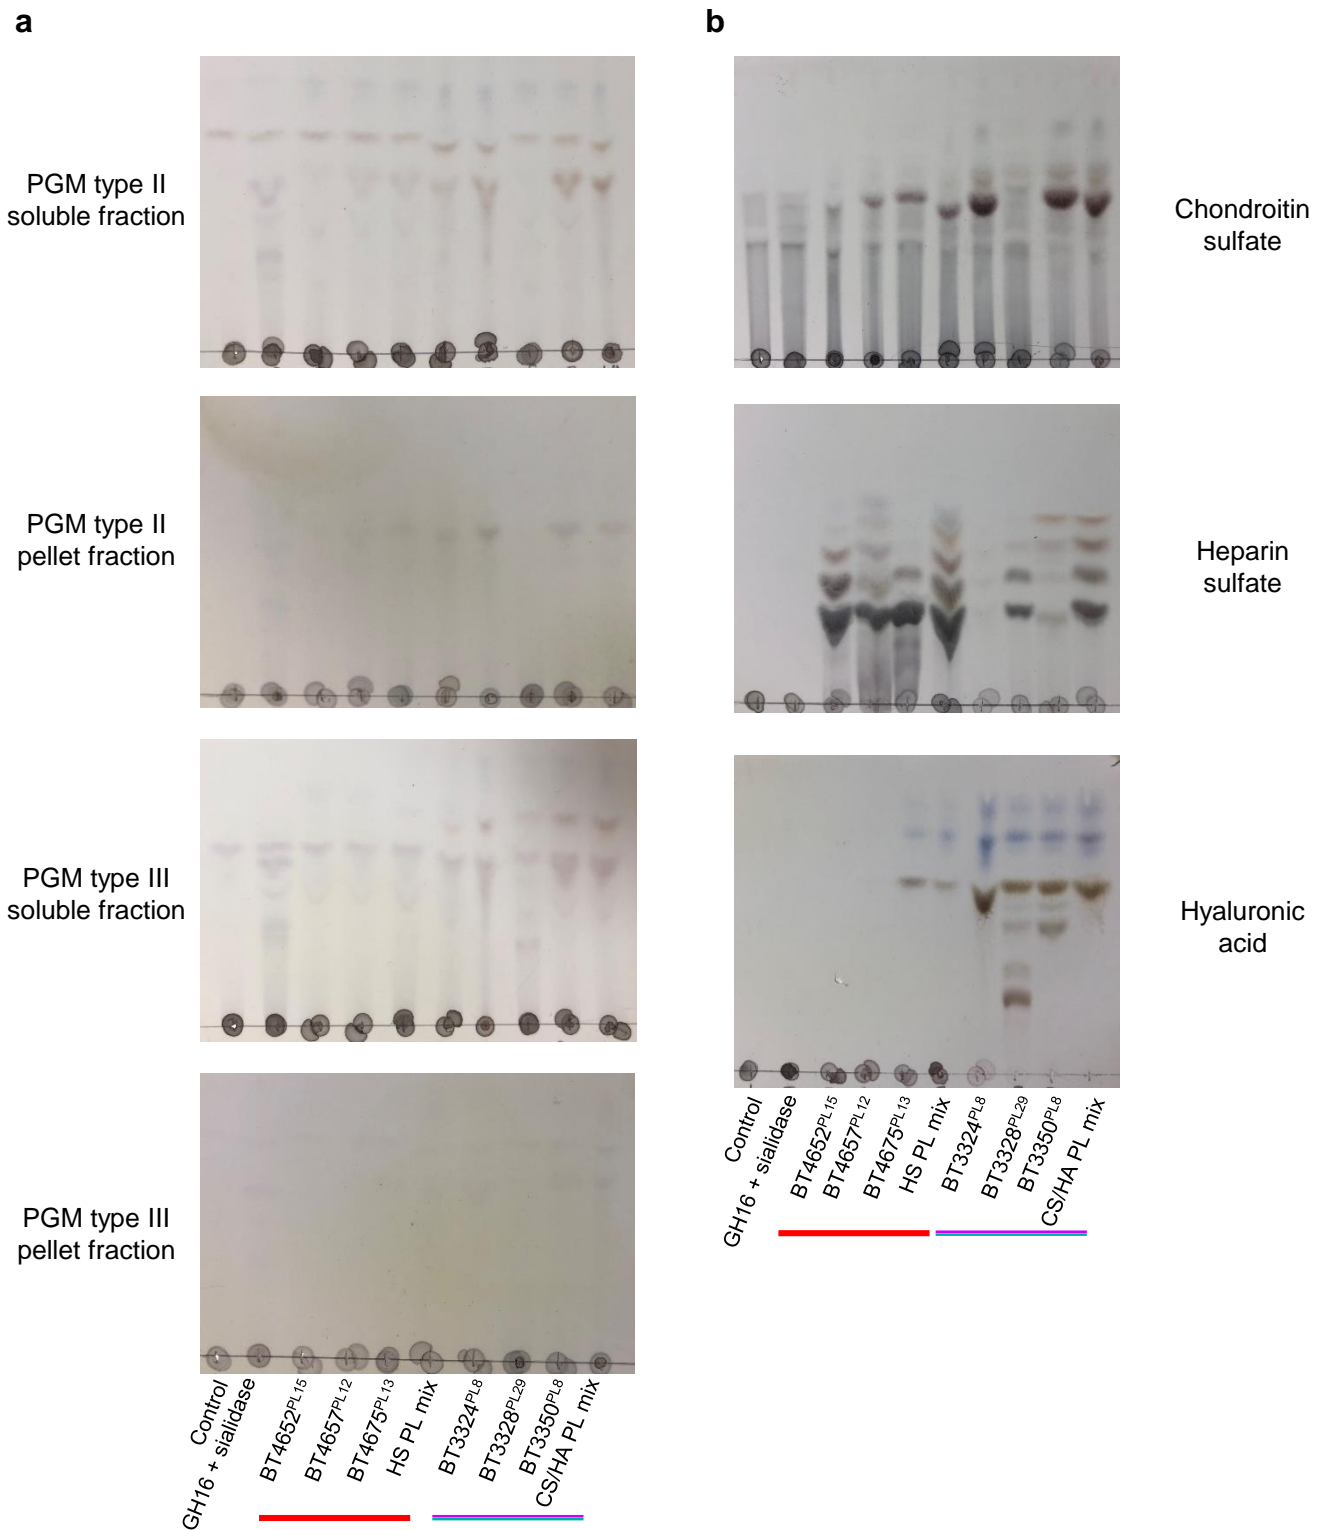

**Supplementary Figure 20 | Analysis of the glycosaminoglycan (GAG) content of porcine gastric mucin (PGM) type II and III.** **a**, The polysaccharide lyases from *B. thetaiotaomicron* involved in or predicted to be involved in the degradation of HS, CS and HA were used to test for the presence of these GAGs in PGM types II and III. PGM was dissolved in DI H<sub>2</sub>O at 50 mg/ml then centrifuged at 16000 x g for 30 min. The supernatant (soluble) and pellet fractions were assayed separately. Each polysaccharide lyase was tested individually and then as a mix (Cartmell *et al.* 2017; Ndeh *et al.* 2018). The red line and purple/teal line represents the HS and CS/HA active lyases, respectively. **b**, The Polysaccharide lyases were tested against pure GAGs as controls.



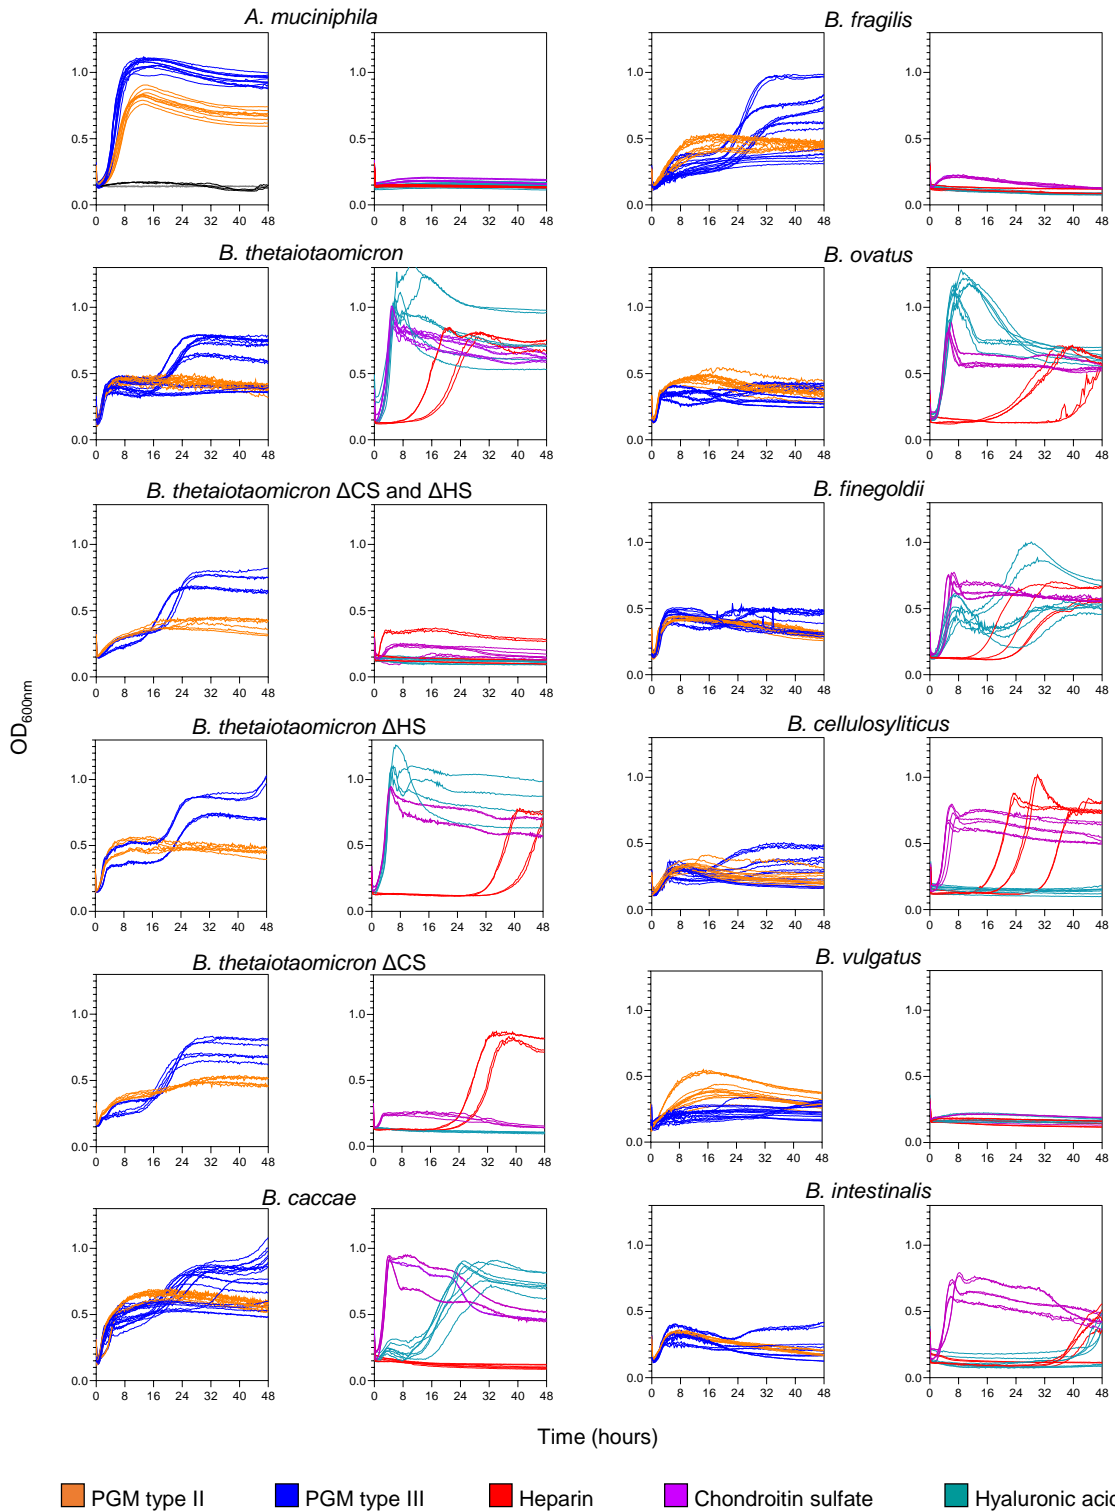

**Supplementary Figure 21 | Growth of human mutualists of host glycans** *A. muciniphila* and different species of *Bacteroides* were grown on commercially available PGM type II, type III, Heparin sulfate, chondroitin sulfate and hyaluronic acid at 35, 40, 20, 20 and 10 mg/ml, respectively. Growth (OD<sub>600</sub>) was monitored continuously using a plate reader.

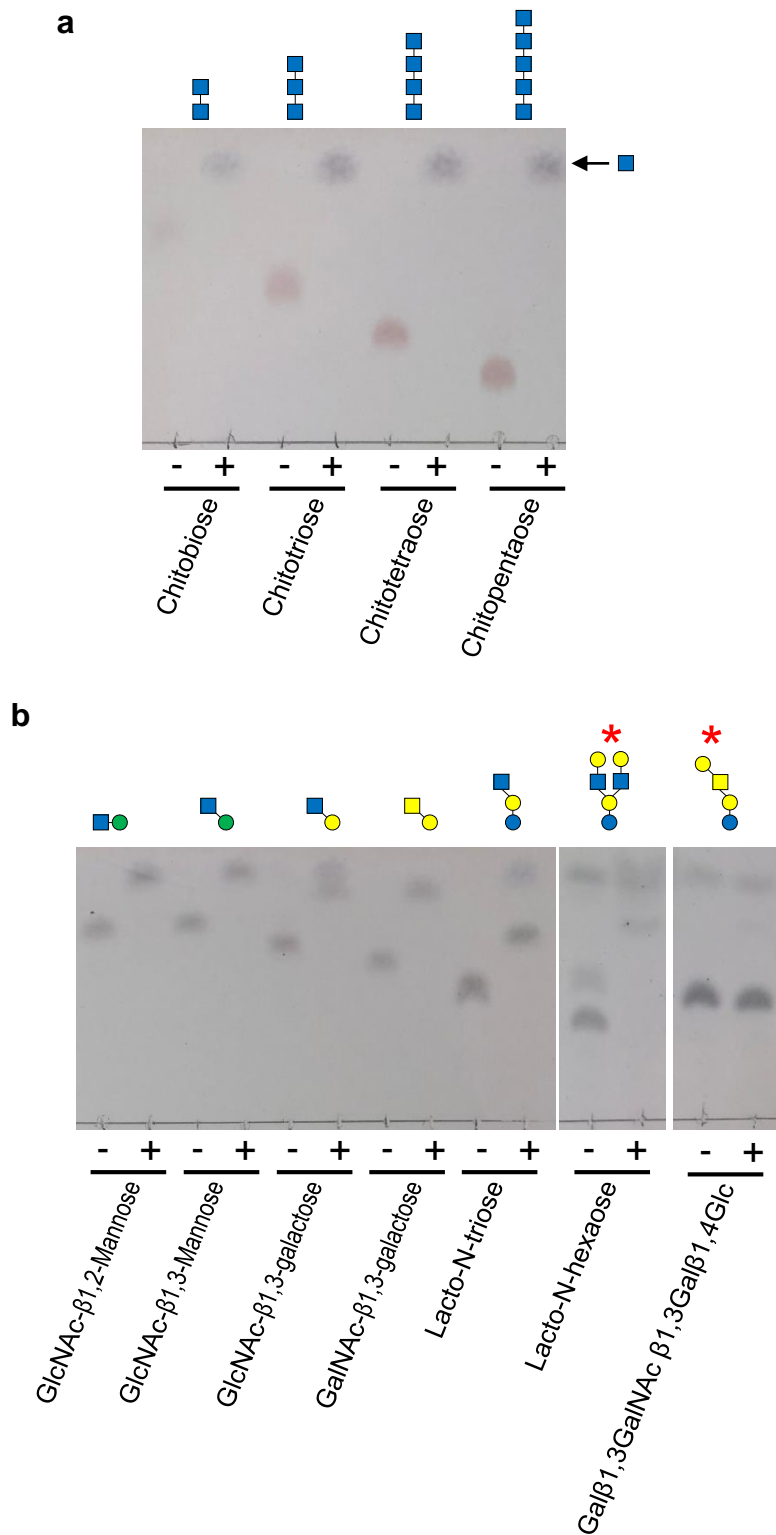

**Supplementary Figure 22 | Activity of BF4059<sup>GH20</sup> against  $\beta$ -GlcNAc containing di- and oligosaccharides a, Chitooligosaccharides. b, Other O- and N-glycan substrates were screened for activity. A red asterisk indicates lacto-N-hexaose and Gal $\beta$ 1,3GalNAc  $\beta$ 1,3Gal $\beta$ 1,4Glc were pre-treated with BF4061<sup>GH35</sup> to remove the galactose before testing.**
